# Supplementary material for: Chemical tagging for sensitive determination of uridine modifications in RNA
Source: Royal Society of Chemistry journal article supplement (doi:10.1039/c9sc05094a), 2020-01-01
Supplement: c9sc05094a1.xlsx [file c9sc05094a1.xlsx]

## Sheet: gene_exp
Column A: Track_id, The database name in gene level. Column B: Gene_Name, The name of gene. Column C: Locus, The genomic coordinate of gene. Column D: Strand, The strand of gene. Column E: Gene_Type, The biological type of gene. Column F ~ G: FPKM, The FPKM of gene in samples.
Gene Information					FPKM
Track_id	Gene_Name	Locus	Strand	Gene_Type
ENSG00000000003.14_2	TSPAN6	chrX:99882106-99894988	-	protein_coding	16.1005
ENSG00000000419.12_2	DPM1	chr20:49551404-49575092	-	protein_coding	26.5026
ENSG00000000457.13_2	SCYL3	chr1:169818772-169863408	-	protein_coding	1.68491
ENSG00000000460.16_4	C1orf112	chr1:169631245-169823221	+	protein_coding	3.45197
ENSG00000001036.13_2	FUCA2	chr6:143815948-143832827	-	protein_coding	22.7337
ENSG00000001084.10_3	GCLC	chr6:53362139-53481768	-	protein_coding	2.04031
ENSG00000001167.14_2	NFYA	chr6:41040684-41067715	+	protein_coding	8.43371
ENSG00000001460.17_2	STPG1	chr1:24683489-24743424	-	protein_coding	2.23801
ENSG00000001461.16_2	NIPAL3	chr1:24742284-24799466	+	protein_coding	2.67054
ENSG00000001497.16_2	LAS1L	chrX:64732462-64754655	-	protein_coding	36.2559
ENSG00000001561.6_2	ENPP4	chr6:46097730-46114436	+	protein_coding	1.05374
ENSG00000001617.11_2	SEMA3F	chr3:50192478-50226508	+	protein_coding	12.7057
ENSG00000001629.9_3	ANKIB1	chr7:91875548-92030698	+	protein_coding	1.17324
ENSG00000001630.15_3	CYP51A1	chr7:91741465-91772266	-	protein_coding	11.8668
ENSG00000001631.15_3	KRIT1	chr7:91828283-91875480	-	protein_coding	2.05843
ENSG00000002016.17_3	RAD52	chr12:1021243-1099219	-	protein_coding	0.790318
ENSG00000002330.13_2	BAD	chr11:64037302-64052176	-	protein_coding	15.1632
ENSG00000002549.12_2	LAP3	chr4:17578815-17609595	+	protein_coding	24.7095
ENSG00000002586.18_3	CD99	chrX:2609220-2659350	+	protein_coding	67.8577
ENSG00000002822.15_3	MAD1L1	chr7:1855429-2272878	-	protein_coding	11.3351
ENSG00000002834.17_3	LASP1	chr17:37026112-37078023	+	protein_coding	5.36241
ENSG00000002919.14_2	SNX11	chr17:46180719-46200436	+	protein_coding	4.05112
ENSG00000003056.3	M6PR	chr12:9092959-9102551	-	protein_coding	5.98181
ENSG00000003096.14_3	KLHL13	chrX:117031776-117251303	-	protein_coding	2.2859
ENSG00000003137.8_2	CYP26B1	chr2:72356367-72375167	-	protein_coding	1.46303
ENSG00000003147.17_2	ICA1	chr7:8152814-8302317	-	protein_coding	1.86743
ENSG00000003249.13_2	DBNDD1	chr16:90071273-90086536	-	protein_coding	17.1571
ENSG00000003393.14_3	ALS2	chr2:202565277-202645912	-	protein_coding	2.25736
ENSG00000003436.15_3	TFPI	chr2:188328957-188430487	-	protein_coding	0.462282
ENSG00000003509.15_2	NDUFAF7	chr2:37458774-37480546	+	protein_coding	4.01566
ENSG00000003756.16_3	RBM5	chr3:50126341-50156454	+	protein_coding	4.66277
ENSG00000003989.17_4	SLC7A2	chr8:17354597-17428082	+	protein_coding	0.460069
ENSG00000004059.10_4	ARF5	chr7:127228399-127231759	+	protein_coding	88.9363
ENSG00000004139.13_3	SARM1	chr17:26691378-26731067	+	protein_coding	1.01087
ENSG00000004142.11_2	POLDIP2	chr17:26674203-26684545	-	protein_coding	79.1416
ENSG00000004399.12_3	PLXND1	chr3:129274018-129325661	-	protein_coding	7.97454
ENSG00000004455.16_2	AK2	chr1:33473541-33546597	-	protein_coding	94.2343
ENSG00000004478.7_2	FKBP4	chr12:2904119-2914589	+	protein_coding	89.6264
ENSG00000004487.15_3	KDM1A	chr1:23345941-23410182	+	protein_coding	37.4498
ENSG00000004534.14_3	RBM6	chr3:49977440-50137478	+	protein_coding	6.87566
ENSG00000004660.14_2	CAMKK1	chr17:3763609-3798185	-	protein_coding	3.452
ENSG00000004700.15_3	RECQL	chr12:21621845-21654603	-	protein_coding	3.73814
ENSG00000004766.15_2	VPS50	chr7:92861653-92990433	+	protein_coding	0.650469
ENSG00000004776.12_2	HSPB6	chr19:36245470-36248980	-	protein_coding	0.443084
ENSG00000004777.18_3	ARHGAP33	chr19:36265434-36279724	+	protein_coding	0.813613
ENSG00000004779.9_2	NDUFAB1	chr16:23592323-23607677	-	protein_coding	38.9865
ENSG00000004799.7_2	PDK4	chr7:95212811-95225803	-	protein_coding	0.096772
ENSG00000004864.13_2	SLC25A13	chr7:95749532-95951459	-	protein_coding	12.6637
ENSG00000004866.20_3	ST7	chr7:116593292-116870157	+	protein_coding	3.19401
ENSG00000004897.11_3	CDC27	chr17:45195069-45266788	-	protein_coding	5.86279
ENSG00000004961.14_2	HCCS	chrX:11129421-11141198	+	protein_coding	21.3186
ENSG00000004975.11_2	DVL2	chr17:7128660-7137864	-	protein_coding	15.2893
ENSG00000005007.12_2	UPF1	chr19:18942747-18979045	+	protein_coding	15.1466
ENSG00000005020.12_3	SKAP2	chr7:26706681-27034858	-	protein_coding	3.95104
ENSG00000005022.5_2	SLC25A5	chrX:118602363-118605282	+	protein_coding	485.078
ENSG00000005059.15_3	MCUB	chr4:110481361-110609882	+	protein_coding	7.4405
ENSG00000005073.5_2	HOXA11	chr7:27221129-27224842	-	protein_coding	16.1914
ENSG00000005075.15_2	POLR2J	chr7:102113565-102119354	-	protein_coding	147.288
ENSG00000005100.12_3	DHX33	chr17:5344232-5372380	-	protein_coding	6.1367
ENSG00000005102.12_2	MEOX1	chr17:41717756-41739322	-	protein_coding	0.958916
ENSG00000005156.11_3	LIG3	chr17:33307513-33336762	+	protein_coding	5.21833
ENSG00000005175.9_3	RPAP3	chr12:48055032-48099844	-	protein_coding	5.74695
ENSG00000005187.11_3	ACSM3	chr16:20621565-20808903	+	protein_coding	1.02232
ENSG00000005189.19_3	REXO5	chr16:20817751-20860990	+	protein_coding	2.14886
ENSG00000005194.14_3	CIAPIN1	chr16:57462081-57481440	-	protein_coding	15.5434
ENSG00000005206.16_1	SPPL2B	chr19:2328614-2354804	+	protein_coding	2.31463
ENSG00000005238.19_2	FAM214B	chr9:35104109-35116338	-	protein_coding	0.630119
ENSG00000005249.12_2	PRKAR2B	chr7:106685094-106802256	+	protein_coding	2.68353
ENSG00000005302.17_3	MSL3	chrX:11776278-11793872	+	protein_coding	2.69173
ENSG00000005339.14_3	CREBBP	chr16:3775055-3930727	-	protein_coding	3.24915
ENSG00000005436.13_3	GCFC2	chr2:75879126-75938115	-	protein_coding	2.56038
ENSG00000005448.16_2	WDR54	chr2:74648805-74652882	+	protein_coding	13.1497
ENSG00000005469.11_2	CROT	chr7:86974997-87029111	+	protein_coding	0.630612
ENSG00000005483.20_3	KMT2E	chr7:104654626-104754808	+	protein_coding	2.26671
ENSG00000005486.16_2	RHBDD2	chr7:75471920-75518244	+	protein_coding	25.61
ENSG00000005513.9_2	SOX8	chr16:1031808-1036979	+	protein_coding	7.82036
ENSG00000005700.14_2	IBTK	chr6:82879700-82957471	-	protein_coding	0.942128
ENSG00000005801.16_3	ZNF195	chr11:3360491-3400452	-	protein_coding	1.07472
ENSG00000005810.17_1	MYCBP2	chr13:77618790-77901185	-	protein_coding	2.32648
ENSG00000005812.10_3	FBXL3	chr13:77566733-77601330	-	protein_coding	2.10518
ENSG00000005882.11_4	PDK2	chr17:48172101-48189516	+	protein_coding	9.63081
ENSG00000005884.17_2	ITGA3	chr17:48133332-48167845	+	protein_coding	1.91248
ENSG00000005889.15_2	ZFX	chrX:24167290-24234372	+	protein_coding	0.822753
ENSG00000005893.15_2	LAMP2	chrX:119561682-119603220	-	protein_coding	14.5219
ENSG00000005961.17_3	ITGA2B	chr17:42449548-42466873	-	protein_coding	1.56764
ENSG00000006007.11_2	GDE1	chr16:19513011-19533467	-	protein_coding	10.6714
ENSG00000006015.17_3	C19orf60	chr19:18699495-18703146	+	protein_coding	6.631
ENSG00000006016.10_2	CRLF1	chr19:18683030-18718551	-	protein_coding	9.82842
ENSG00000006042.11_2	TMEM98	chr17:31254928-31272124	+	protein_coding	5.46324
ENSG00000006062.14_2	MAP3K14	chr17:43340488-43394406	-	protein_coding	1.04659
ENSG00000006118.14_4	TMEM132A	chr11:60691935-60704631	+	protein_coding	5.0833
ENSG00000006125.17_4	AP2B1	chr17:33905065-34053428	+	protein_coding	9.95225
ENSG00000006194.9_3	ZNF263	chr16:3313800-3351401	+	protein_coding	2.04269
ENSG00000006282.20_3	SPATA20	chr17:48620419-48633213	+	protein_coding	3.10166
ENSG00000006283.17_3	CACNA1G	chr17:48638429-48704835	+	protein_coding	0.75571
ENSG00000006327.13_2	TNFRSF12A	chr16:3068446-3072384	+	protein_coding	12.1663
ENSG00000006377.10_2	DLX6	chr7:96634860-96640351	+	protein_coding	3.13253
ENSG00000006432.15_3	MAP3K9	chr14:71189243-71276251	-	protein_coding	0.895719
ENSG00000006451.7_3	RALA	chr7:39663082-39747723	+	protein_coding	11.0083
ENSG00000006453.13_3	BAIAP2L1	chr7:97920963-98030380	-	protein_coding	19.0732
ENSG00000006459.10_2	KDM7A	chr7:139784546-139876835	-	protein_coding	0.9038
ENSG00000006530.15_2	AGK	chr7:141250989-141355044	+	protein_coding	11.5829
ENSG00000006576.16_2	PHTF2	chr7:77428109-77586820	+	protein_coding	1.06709
ENSG00000006607.13_3	FARP2	chr2:242295658-242434256	+	protein_coding	2.72266
ENSG00000006611.15_2	USH1C	chr11:17515442-17565963	-	protein_coding	9.67477
ENSG00000006625.17_3	GGCT	chr7:30536237-30544460	-	protein_coding	24.3536
ENSG00000006634.7_2	DBF4	chr7:87505531-87538856	+	protein_coding	1.87291
ENSG00000006638.11_2	TBXA2R	chr19:3594504-3606838	-	protein_coding	4.33708
ENSG00000006652.13_3	IFRD1	chr7:112063023-112121072	+	protein_coding	3.37491
ENSG00000006695.10_2	COX10	chr17:13972813-14111994	+	protein_coding	8.41471
ENSG00000006704.10_3	GTF2IRD1	chr7:73868120-74016930	+	protein_coding	9.30241
ENSG00000006712.14_3	PAF1	chr19:39876492-39881835	-	protein_coding	64.6656
ENSG00000006715.15_3	VPS41	chr7:38762563-38971994	-	protein_coding	2.1622
ENSG00000006740.16_2	ARHGAP44	chr17:12692856-12894960	+	protein_coding	2.55336
ENSG00000006744.18_3	ELAC2	chr17:12895708-12921504	-	protein_coding	19.2462
ENSG00000006757.11_2	PNPLA4	chrX:7866288-7895780	-	protein_coding	11.5394
ENSG00000006831.9_2	ADIPOR2	chr12:1797740-1897844	+	protein_coding	10.9642
ENSG00000007047.14_3	MARK4	chr19:45582546-45808541	+	protein_coding	16.4149
ENSG00000007080.10_2	CCDC124	chr19:18043825-18054800	+	protein_coding	260.409
ENSG00000007168.12_3	PAFAH1B1	chr17:2496504-2588909	+	protein_coding	6.09767
ENSG00000007171.16_3	NOS2	chr17:26083792-26127525	-	protein_coding	8.32619
ENSG00000007202.14_3	KIAA0100	chr17:26941458-26972472	-	protein_coding	18.8427
ENSG00000007237.18_3	GAS7	chr17:9813926-10101868	-	protein_coding	0.987118
ENSG00000007255.10_2	TRAPPC6A	chr19:45666186-45681495	-	protein_coding	20.5296
ENSG00000007264.14_3	MATK	chr19:3777968-3802127	-	protein_coding	20.5118
ENSG00000007314.12_2	SCN4A	chr17:62015914-62050278	-	protein_coding	0.936307
ENSG00000007341.18_2	ST7L	chr1:113066140-113163447	-	protein_coding	1.87262
ENSG00000007350.16_3	TKTL1	chrX:153524024-153558700	+	protein_coding	0.328433
ENSG00000007372.21_4	PAX6	chr11:31806327-31839610	-	protein_coding	0.621586
ENSG00000007376.7_2	RPUSD1	chr16:834974-838397	-	protein_coding	19.5773
ENSG00000007384.15_2	RHBDF1	chr16:108058-126354	-	protein_coding	2.52789
ENSG00000007392.16_3	LUC7L	chr16:238968-279462	-	protein_coding	6.84437
ENSG00000007402.11_3	CACNA2D2	chr3:50400230-50541675	-	protein_coding	3.86616
ENSG00000007516.13_4	BAIAP3	chr16:1383602-1399442	+	protein_coding	0.820641
ENSG00000007520.3_2	TSR3	chr16:1399241-1401912	-	protein_coding	56.8456
ENSG00000007541.16_1	PIGQ	chr16:616995-634136	+	protein_coding	3.9029
ENSG00000007545.15_3	CRAMP1	chr16:1662326-1727909	+	protein_coding	0.840555
ENSG00000007866.19_4	TEAD3	chr6:35441374-35464853	-	protein_coding	8.03797
ENSG00000007923.15_2	DNAJC11	chr1:6694228-6761984	-	protein_coding	19.5492
ENSG00000007944.14_2	MYLIP	chr6:16129356-16148479	+	protein_coding	2.49221
ENSG00000007968.6_2	E2F2	chr1:23832922-23857712	-	protein_coding	6.06218
ENSG00000008018.8_2	PSMB1	chr6:170844205-170862429	-	protein_coding	126.599
ENSG00000008083.13_2	JARID2	chr6:15246527-15522271	+	protein_coding	7.23207
ENSG00000008128.22_3	CDK11A	chr1:1634169-1655763	-	protein_coding	12.2365
ENSG00000008130.15_2	NADK	chr1:1682671-1711896	-	protein_coding	14.9065
ENSG00000008256.15_2	CYTH3	chr7:6201407-6312275	-	protein_coding	6.31048
ENSG00000008277.14_2	ADAM22	chr7:87563458-87832204	+	protein_coding	0.447665
ENSG00000008282.8_2	SYPL1	chr7:105730949-105753022	-	protein_coding	6.64097
ENSG00000008283.15_3	CYB561	chr17:61509665-61523739	-	protein_coding	1.74382
ENSG00000008294.20_2	SPAG9	chr17:49039535-49198226	-	protein_coding	3.30406
ENSG00000008300.16_3	CELSR3	chr3:48673902-48700348	-	protein_coding	0.640612
ENSG00000008311.14_2	AASS	chr7:121715701-121784334	-	protein_coding	1.53132
ENSG00000008324.11_2	SS18L2	chr3:42623332-42636606	+	protein_coding	6.21426
ENSG00000008382.15_4	MPND	chr19:4343524-4360083	+	protein_coding	23.6499
ENSG00000008394.12_3	MGST1	chr12:16500076-16762193	+	protein_coding	4.48891
ENSG00000008405.11_3	CRY1	chr12:107385142-107487607	-	protein_coding	2.00615
ENSG00000008441.16_4	NFIX	chr19:13106422-13209610	+	protein_coding	12.3582
ENSG00000008513.14_3	ST3GAL1	chr8:134467091-134584183	-	protein_coding	2.42816
ENSG00000008517.16_4	IL32	chr16:3115298-3132193	+	protein_coding	4.31939
ENSG00000008710.19_3	PKD1	chr16:2138711-2185899	-	protein_coding	1.23574
ENSG00000008735.13_2	MAPK8IP2	chr22:51039114-51052409	+	protein_coding	10.6572
ENSG00000008838.19_3	MED24	chr17:38175350-38217468	-	protein_coding	17.5555
ENSG00000008853.16_2	RHOBTB2	chr8:22844930-22877712	+	protein_coding	3.15516
ENSG00000008869.11_2	HEATR5B	chr2:37195526-37311485	-	protein_coding	2.37811
ENSG00000008952.16_2	SEC62	chr3:169684423-169716161	+	protein_coding	6.38945
ENSG00000008988.9_2	RPS20	chr8:56979854-56987140	-	protein_coding	100.444
ENSG00000009307.15_3	CSDE1	chr1:115259534-115301297	-	protein_coding	59.1507
ENSG00000009335.17_3	UBE3C	chr7:156931607-157062066	+	protein_coding	6.39924
ENSG00000009413.15_3	REV3L	chr6:111620231-111804918	-	protein_coding	0.547441
ENSG00000009780.15_3	FAM76A	chr1:28052490-28089633	+	protein_coding	3.70909
ENSG00000009830.11_3	POMT2	chr14:77741299-77787227	-	protein_coding	2.27516
ENSG00000009844.15_2	VTA1	chr6:142468299-142545826	+	protein_coding	7.27725
ENSG00000009950.15_4	MLXIPL	chr7:73007524-73038873	-	protein_coding	4.22088
ENSG00000009954.10_2	BAZ1B	chr7:72854728-72936608	-	protein_coding	17.8372
ENSG00000010017.12_2	RANBP9	chr6:13621730-13711796	-	protein_coding	11.2621
ENSG00000010072.15_2	SPRTN	chr1:231472850-231490769	+	protein_coding	2.28695
ENSG00000010165.19_3	METTL13	chr1:171750804-171783163	+	protein_coding	11.8495
ENSG00000010219.13_3	DYRK4	chr12:4671370-4724468	+	protein_coding	3.05384
ENSG00000010244.18_3	ZNF207	chr17:30677136-30708905	+	protein_coding	13.4344
ENSG00000010256.10_2	UQCRC1	chr3:48636435-48648409	-	protein_coding	97.0826
ENSG00000010270.13_2	STARD3NL	chr7:38217824-38270272	+	protein_coding	6.07793
ENSG00000010278.12_3	CD9	chr12:6308881-6347437	+	protein_coding	17.2858
ENSG00000010292.12_3	NCAPD2	chr12:6602522-6641121	+	protein_coding	45.2512
ENSG00000010295.19_3	IFFO1	chr12:6647541-6665249	-	protein_coding	4.41633
ENSG00000010310.8_3	GIPR	chr19:46171502-46186982	+	protein_coding	0.619568
ENSG00000010318.20_3	PHF7	chr3:52444673-52457657	+	protein_coding	1.59442
ENSG00000010319.6_3	SEMA3G	chr3:52467069-52479101	-	protein_coding	3.15153
ENSG00000010322.15_2	NISCH	chr3:52489134-52527087	+	protein_coding	3.95141
ENSG00000010361.13_3	FUZ	chr19:50310126-50320633	-	protein_coding	10.5484
ENSG00000010404.17_3	IDS	chrX:148558521-148602635	-	protein_coding	5.02505
ENSG00000010539.11_4	ZNF200	chr16:3272325-3286221	-	protein_coding	0.926569
ENSG00000010626.14_4	LRRC23	chr12:6982733-7023407	+	protein_coding	4.60372
ENSG00000010803.16_2	SCMH1	chr1:41492872-41707826	-	protein_coding	8.33219
ENSG00000010810.17_3	FYN	chr6:111981535-112194655	-	protein_coding	8.62966
ENSG00000010818.9_2	HIVEP2	chr6:143072604-143277835	-	protein_coding	0.822131
ENSG00000011007.12_2	ELOA	chr1:24069645-24088549	+	protein_coding	7.84271
ENSG00000011009.10_2	LYPLA2	chr1:24117460-24122029	+	protein_coding	24.042
ENSG00000011021.21_3	CLCN6	chr1:11866153-11903201	+	protein_coding	1.20563
ENSG00000011028.13_2	MRC2	chr17:60704762-60770958	+	protein_coding	7.24871
ENSG00000011052.21_3	NME1-NME2	chr17:49230951-49249105	+	protein_coding	402.885
ENSG00000011105.12_3	TSPAN9	chr12:3186521-3395730	+	protein_coding	3.76471
ENSG00000011114.14_3	BTBD7	chr14:93703896-93799438	-	protein_coding	0.935778
ENSG00000011132.11_3	APBA3	chr19:3750817-3761697	-	protein_coding	3.036
ENSG00000011143.16_3	MKS1	chr17:56282798-56296966	-	protein_coding	8.56145
ENSG00000011198.7_2	ABHD5	chr3:43731605-43775863	+	protein_coding	2.78348
ENSG00000011243.17_3	AKAP8L	chr19:15490859-15529952	-	protein_coding	34.7976
ENSG00000011258.15_3	MBTD1	chr17:49254786-49337524	-	protein_coding	1.2926
ENSG00000011260.13_2	UTP18	chr17:49337889-49375297	+	protein_coding	17.476
ENSG00000011275.18_3	RNF216	chr7:5659678-5821370	-	protein_coding	10.3589
ENSG00000011295.15_4	TTC19	chr17:15902694-15948329	+	protein_coding	2.142
ENSG00000011304.19_4	PTBP1	chr19:797075-812327	+	protein_coding	82.4388
ENSG00000011332.19_3	DPF1	chr19:38701646-38720354	-	protein_coding	5.21711
ENSG00000011347.9_3	SYT7	chr11:61282785-61348620	-	protein_coding	6.53105
ENSG00000011376.9_3	LARS2	chr3:45429998-45590913	+	protein_coding	7.38913
ENSG00000011405.13_3	PIK3C2A	chr11:17099277-17229530	-	protein_coding	1.78437
ENSG00000011422.11_3	PLAUR	chr19:44150247-44174699	-	protein_coding	2.55293
ENSG00000011426.10_3	ANLN	chr7:36429415-36493400	+	protein_coding	8.31846
ENSG00000011451.17_3	WIZ	chr19:15530791-15560762	-	protein_coding	13.7756
ENSG00000011454.16_3	RABGAP1	chr9:125703112-125867145	+	protein_coding	2.85071
ENSG00000011478.11_2	QPCTL	chr19:46195741-46207247	+	protein_coding	9.87102
ENSG00000011485.14_2	PPP5C	chr19:46850251-46896238	+	protein_coding	27.2757
ENSG00000011523.13_3	CEP68	chr2:65283500-65314138	+	protein_coding	2.08173
ENSG00000011566.14_3	MAP4K3	chr2:39476407-39664453	-	protein_coding	0.976159
ENSG00000011638.10_3	TMEM159	chr16:21169698-21191937	+	protein_coding	2.2042
ENSG00000012048.20_3	BRCA1	chr17:41196312-41322262	-	protein_coding	2.05154
ENSG00000012061.15_3	ERCC1	chr19:45910591-45982086	-	protein_coding	15.75
ENSG00000012171.19_3	SEMA3B	chr3:50304990-50314977	+	protein_coding	0.861594
ENSG00000012174.11_3	MBTPS2	chrX:21857754-21903542	+	protein_coding	1.33405
ENSG00000012211.12_3	PRICKLE3	chrX:49031613-49042981	-	protein_coding	12.3257
ENSG00000012232.8_2	EXTL3	chr8:28457986-28613116	+	protein_coding	2.59126
ENSG00000012660.13_3	ELOVL5	chr6:53132196-53213977	-	protein_coding	24.0717
ENSG00000012822.15_3	CALCOCO1	chr12:54102301-54121529	-	protein_coding	4.8129
ENSG00000012963.14_3	UBR7	chr14:93673401-93695561	+	protein_coding	12.5009
ENSG00000012983.11_2	MAP4K5	chr14:50885219-51027844	-	protein_coding	1.97169
ENSG00000013016.15_3	EHD3	chr2:31457203-31492313	+	protein_coding	6.24557
ENSG00000013275.7_2	PSMC4	chr19:40476912-40487348	+	protein_coding	89.8446
ENSG00000013288.8_2	MAN2B2	chr4:6576902-6625089	+	protein_coding	3.14478
ENSG00000013306.15_3	SLC25A39	chr17:42396993-42402238	-	protein_coding	44.7915
ENSG00000013364.18_3	MVP	chr16:29831715-29859360	+	protein_coding	0.879393
ENSG00000013374.15_4	NUB1	chr7:151038785-151075535	+	protein_coding	14.74
ENSG00000013375.15_3	PGM3	chr6:83870869-83903655	-	protein_coding	2.24582
ENSG00000013392.7_2	RWDD2A	chr6:83903098-83908651	+	protein_coding	1.01686
ENSG00000013441.15_2	CLK1	chr2:201717732-201729467	-	protein_coding	1.57831
ENSG00000013503.9_2	POLR3B	chr12:106751436-106903976	+	protein_coding	7.92074
ENSG00000013523.9_3	ANGEL1	chr14:77252521-77292589	-	protein_coding	6.2145
ENSG00000013561.17_3	RNF14	chr5:141337893-141369856	+	protein_coding	3.32762
ENSG00000013563.13_3	DNASE1L1	chrX:153629579-153640449	-	protein_coding	3.66049
ENSG00000013573.16_3	DDX11	chr12:31226779-31257725	+	protein_coding	7.99699
ENSG00000013583.8_3	HEBP1	chr12:13127798-13153207	-	protein_coding	20.4691
ENSG00000013588.7_3	GPRC5A	chr12:13043716-13070871	+	protein_coding	0.843419
ENSG00000013619.13_3	MAMLD1	chrX:149529689-149682448	+	protein_coding	2.24169
ENSG00000013810.18_3	TACC3	chr4:1723217-1746903	+	protein_coding	27.5123
ENSG00000014123.9_2	UFL1	chr6:96969471-97003152	+	protein_coding	2.98841
ENSG00000014138.8_3	POLA2	chr11:65029233-65073060	+	protein_coding	15.8317
ENSG00000014164.6_2	ZC3H3	chr8:144519825-144623623	-	protein_coding	17.0831
ENSG00000014216.15_4	CAPN1	chr11:64948037-64979477	+	protein_coding	17.4519
ENSG00000014257.15_2	ACPP	chr3:132036211-132087142	+	protein_coding	0.526867
ENSG00000014641.17_2	MDH1	chr2:63815743-63834331	+	protein_coding	27.0628
ENSG00000014824.13_3	SLC30A9	chr4:41992489-42092474	+	protein_coding	3.67027
ENSG00000014919.12_2	COX15	chr10:101471601-101491857	-	protein_coding	11.506
ENSG00000015133.18_2	CCDC88C	chr14:91737667-91884188	-	protein_coding	2.17276
ENSG00000015153.14_2	YAF2	chr12:42550906-42632151	-	protein_coding	0.748172
ENSG00000015171.19_3	ZMYND11	chr10:180405-300577	+	protein_coding	2.47948
ENSG00000015285.10_2	WAS	chrX:48534985-48549818	+	protein_coding	1.29984
ENSG00000015475.18_2	BID	chr22:18216904-18257536	-	protein_coding	8.09396
ENSG00000015479.18_3	MATR3	chr5:138629337-138667366	+	protein_coding	5.4747
ENSG00000015532.9_2	XYLT2	chr17:48423453-48440499	+	protein_coding	8.33106
ENSG00000015568.12_2	RGPD5	chr2:110550335-110615272	+	protein_coding	0.44583
ENSG00000015676.17_2	NUDCD3	chr7:44418720-44530479	-	protein_coding	6.69145
ENSG00000016082.14_2	ISL1	chr5:50679225-50690572	+	protein_coding	5.83065
ENSG00000016391.10_3	CHDH	chr3:53846362-53880417	-	protein_coding	2.21649
ENSG00000016864.18_3	GLT8D1	chr3:52728504-52740048	-	protein_coding	6.072
ENSG00000017260.19_4	ATP2C1	chr3:130569439-130735556	+	protein_coding	4.49691
ENSG00000017797.12_3	RALBP1	chr18:9475007-9538114	+	protein_coding	4.74663
ENSG00000018189.12_3	RUFY3	chr4:71569921-71673032	+	protein_coding	1.17513
ENSG00000018236.14_4	CNTN1	chr12:41086244-41466220	+	protein_coding	0.731941
ENSG00000018408.14_3	WWTR1	chr3:149235022-149454501	-	protein_coding	4.52986
ENSG00000018510.13_3	AGPS	chr2:178257372-178424027	+	protein_coding	3.92958
ENSG00000018610.13_2	CXorf56	chrX:118672112-118699371	-	protein_coding	21.7289
ENSG00000018699.11_2	TTC27	chr2:32853099-33046118	+	protein_coding	8.78712
ENSG00000018869.16_3	ZNF582	chr19:56887215-56904914	-	protein_coding	0.496541
ENSG00000019144.18_3	PHLDB1	chr11:118477155-118528748	+	protein_coding	2.06202
ENSG00000019505.7_2	SYT13	chr11:45261852-45307870	-	protein_coding	1.04737
ENSG00000019549.9_2	SNAI2	chr8:49830327-49834299	-	protein_coding	26.8615
ENSG00000019582.14_3	CD74	chr5:149781200-149792492	-	protein_coding	0.3627
ENSG00000019995.6_3	ZRANB1	chr10:126630692-126676758	+	protein_coding	3.94035
ENSG00000020129.15_2	NCDN	chr1:36023074-36032875	+	protein_coding	11.7786
ENSG00000020181.17_2	ADGRA2	chr8:37641709-37702414	+	protein_coding	13.729
ENSG00000020256.19_3	ZFP64	chr20:50668202-50820847	-	protein_coding	9.09828
ENSG00000020426.10_3	MNAT1	chr14:61201460-61436671	+	protein_coding	5.05567
ENSG00000020577.13_2	SAMD4A	chr14:55033815-55260033	+	protein_coding	0.556001
ENSG00000020633.18_2	RUNX3	chr1:25226002-25291612	-	protein_coding	1.7506
ENSG00000020922.12_3	MRE11	chr11:94148744-94227074	-	protein_coding	1.63305
ENSG00000021300.13_3	PLEKHB1	chr11:73357223-73373864	+	protein_coding	5.69752
ENSG00000021355.12_2	SERPINB1	chr6:2832566-2842240	-	protein_coding	8.72678
ENSG00000021574.11_2	SPAST	chr2:32288680-32382706	+	protein_coding	1.01721
ENSG00000021762.19_3	OSBPL5	chr11:3108346-3187969	-	protein_coding	4.48517
ENSG00000021776.10_3	AQR	chr15:35143983-35262040	-	protein_coding	2.75404
ENSG00000021826.14_3	CPS1	chr2:211342406-211543831	+	protein_coding	0.519273
ENSG00000022267.16_3	FHL1	chrX:135228861-135293518	+	protein_coding	39.1666
ENSG00000022277.12_3	RTFDC1	chr20:55043641-55094505	+	protein_coding	21.078
ENSG00000022567.9_3	SLC45A4	chr8:142217265-142318404	-	protein_coding	1.36886
ENSG00000022840.15_3	RNF10	chr12:120971283-121015397	+	protein_coding	14.4093
ENSG00000022976.15_3	ZNF839	chr14:102783714-102809039	+	protein_coding	1.87139
ENSG00000023041.11_3	ZDHHC6	chr10:114184186-114206675	-	protein_coding	4.69806
ENSG00000023191.16_2	RNH1	chr11:494512-507300	-	protein_coding	9.49449
ENSG00000023228.13_3	NDUFS1	chr2:206979541-207024327	-	protein_coding	7.58768
ENSG00000023287.12_3	RB1CC1	chr8:53535016-53658403	-	protein_coding	3.4733
ENSG00000023318.7_3	ERP44	chr9:102741461-102861322	-	protein_coding	17.7667
ENSG00000023330.14_2	ALAS1	chr3:52232102-52248343	+	protein_coding	28.4108
ENSG00000023516.8_2	AKAP11	chr13:42846289-42897403	+	protein_coding	1.07083
ENSG00000023572.8_2	GLRX2	chr1:193065598-193075244	-	protein_coding	15.8212
ENSG00000023608.4_3	SNAPC1	chr14:62229075-62263146	+	protein_coding	4.38498
ENSG00000023697.12_3	DERA	chr12:16064106-16190216	+	protein_coding	5.48231
ENSG00000023734.10_3	STRAP	chr12:16035325-16056412	+	protein_coding	84.1156
ENSG00000023892.10_2	DEF6	chr6:35265629-35289548	+	protein_coding	10.262
ENSG00000023902.13_2	PLEKHO1	chr1:150121373-150136916	+	protein_coding	3.27251
ENSG00000023909.9_2	GCLM	chr1:94350761-94375012	-	protein_coding	1.64576
ENSG00000024048.10_2	UBR2	chr6:42531800-42661242	+	protein_coding	2.28656
ENSG00000024422.11_3	EHD2	chr19:48216600-48246391	+	protein_coding	9.17567
ENSG00000024526.16_3	DEPDC1	chr1:68939835-68962904	-	protein_coding	4.41745
ENSG00000024862.17_3	CCDC28A	chr6:139094646-139114456	+	protein_coding	7.93066
ENSG00000025039.14_2	RRAGD	chr6:90074355-90121989	-	protein_coding	4.4864
ENSG00000025156.12_2	HSF2	chr6:122720691-122754264	+	protein_coding	6.72519
ENSG00000025293.16_3	PHF20	chr20:34359896-34538303	+	protein_coding	3.51819
ENSG00000025423.11_3	HSD17B6	chr12:57145945-57181574	+	protein_coding	2.59188
ENSG00000025434.18_3	NR1H3	chr11:47269851-47290583	+	protein_coding	3.16274
ENSG00000025708.13_3	TYMP	chr22:50964181-50968485	-	protein_coding	0.918115
ENSG00000025770.18_2	NCAPH2	chr22:50946645-50961901	+	protein_coding	35.1049
ENSG00000025772.7_2	TOMM34	chr20:43570771-43589127	-	protein_coding	61.2318
ENSG00000025796.13_2	SEC63	chr6:108188960-108279393	-	protein_coding	9.3003
ENSG00000025800.13_3	KPNA6	chr1:32573639-32642169	+	protein_coding	6.71184
ENSG00000026025.15_3	VIM	chr10:17270258-17279592	+	protein_coding	151.078
ENSG00000026036.21_3	RTEL1-TNFRSF6B	chr20:62290653-62330037	+	protein_coding	0.678995
ENSG00000026103.21_3	FAS	chr10:90750339-90775542	+	protein_coding	0.18824
ENSG00000026297.15_3	RNASET2	chr6:167342992-167370679	-	protein_coding	4.51583
ENSG00000026559.13_3	KCNG1	chr20:49620193-49639666	-	protein_coding	9.2315
ENSG00000026652.13_3	AGPAT4	chr6:161551011-161695093	-	protein_coding	2.43904
ENSG00000026950.16_3	BTN3A1	chr6:26402465-26415444	+	protein_coding	1.76352
ENSG00000027001.9_3	MIPEP	chr13:24304328-24463558	-	protein_coding	7.20518
ENSG00000027075.14_3	PRKCH	chr14:61654277-62017694	+	protein_coding	1.24536
ENSG00000027697.13_3	IFNGR1	chr6:137518621-137540586	-	protein_coding	9.14558
ENSG00000027847.13_3	B4GALT7	chr5:177027101-177037348	+	protein_coding	4.83415
ENSG00000027869.11_3	SH2D2A	chr1:156776035-156786654	-	protein_coding	11.9754
ENSG00000028116.16_3	VRK2	chr2:58134786-58387055	+	protein_coding	2.4314
ENSG00000028203.17_2	VEZT	chr12:95611522-95696566	+	protein_coding	2.12043
ENSG00000028310.17_3	BRD9	chr5:850406-892939	-	protein_coding	4.45438
ENSG00000028528.14_3	SNX1	chr15:64386322-64438289	+	protein_coding	6.48642
ENSG00000028839.9_3	TBPL1	chr6:134273308-134311570	+	protein_coding	2.85204
ENSG00000029153.14_3	ARNTL2	chr12:27485787-27578222	+	protein_coding	0.903165
ENSG00000029363.16_3	BCLAF1	chr6:136577765-136610989	-	protein_coding	4.79624
ENSG00000029364.11_2	SLC39A9	chr14:69864732-69929105	+	protein_coding	3.39654
ENSG00000029534.19_3	ANK1	chr8:41510739-41754280	-	protein_coding	1.25973
ENSG00000029639.10_2	TFB1M	chr6:155578643-155635627	-	protein_coding	12.791
ENSG00000029725.16_3	RABEP1	chr17:5185560-5289132	+	protein_coding	9.40877
ENSG00000029993.14_3	HMGB3	chrX:150148982-150159248	+	protein_coding	46.0911
ENSG00000030066.13_3	NUP160	chr11:47799639-47870107	-	protein_coding	7.86048
ENSG00000030110.12_2	BAK1	chr6:33540324-33548070	-	protein_coding	19.9467
ENSG00000030582.17_3	GRN	chr17:42422454-42430470	+	protein_coding	28.6012
ENSG00000031003.10_3	FAM13B	chr5:137273649-137387650	-	protein_coding	0.906806
ENSG00000031081.10_4	ARHGAP31	chr3:119013220-119139561	+	protein_coding	0.870015
ENSG00000031691.6_2	CENPQ	chr6:49431091-49460820	+	protein_coding	3.67919
ENSG00000031698.12_2	SARS	chr1:109756540-109780791	+	protein_coding	135.844
ENSG00000031823.14_3	RANBP3	chr19:5916150-5978153	-	protein_coding	14.2689
ENSG00000032219.18_2	ARID4A	chr14:58765103-58840605	+	protein_coding	0.73508
ENSG00000032389.12_4	EIPR1	chr2:3192696-3381653	-	protein_coding	6.32156
ENSG00000032444.15_3	PNPLA6	chr19:7598890-7626650	+	protein_coding	7.11196
ENSG00000032742.17_3	IFT88	chr13:21141208-21265576	+	protein_coding	0.704912
ENSG00000033011.11_3	ALG1	chr16:5083961-5137380	+	protein_coding	6.58257
ENSG00000033030.13_2	ZCCHC8	chr12:122956147-122985620	-	protein_coding	3.38063
ENSG00000033050.7_2	ABCF2	chr7:150904923-150924316	-	protein_coding	58.8381
ENSG00000033100.16_3	CHPF2	chr7:150929575-150935913	+	protein_coding	5.02393
ENSG00000033170.16_3	FUT8	chr14:65877310-66210839	+	protein_coding	2.52218
ENSG00000033178.12_2	UBA6	chr4:68478370-68566897	-	protein_coding	1.57129
ENSG00000033327.12_3	GAB2	chr11:77926343-78129394	-	protein_coding	1.67436
ENSG00000033627.16_3	ATP6V0A1	chr17:40610862-40674629	+	protein_coding	4.7723
ENSG00000033800.13_2	PIAS1	chr15:68346517-68490941	+	protein_coding	5.10073
ENSG00000033867.16_3	SLC4A7	chr3:27414212-27525911	-	protein_coding	0.714465
ENSG00000034053.14_3	APBA2	chr15:29129629-29410518	+	protein_coding	8.90795
ENSG00000034152.18_3	MAP2K3	chr17:21187984-21218552	+	protein_coding	15.1736
ENSG00000034510.5_2	TMSB10	chr2:85132749-85133799	+	protein_coding	1375.58
ENSG00000034533.11_2	ASTE1	chr3:130732719-130746493	-	protein_coding	2.33069
ENSG00000034677.12_3	RNF19A	chr8:101269288-101348446	-	protein_coding	0.848346
ENSG00000034693.14_3	PEX3	chr6:143771944-143811147	+	protein_coding	10.2745
ENSG00000034713.7_2	GABARAPL2	chr16:75600249-75611779	+	protein_coding	20.8708
ENSG00000035141.7_2	FAM136A	chr2:70523107-70529222	-	protein_coding	22.3092
ENSG00000035403.17_3	VCL	chr10:75754951-75881121	+	protein_coding	12.9716
ENSG00000035499.12_2	DEPDC1B	chr5:59892739-59996017	-	protein_coding	3.23583
ENSG00000035681.7_3	NSMAF	chr8:59496063-59572403	-	protein_coding	1.95674
ENSG00000035687.9_3	ADSS	chr1:244571796-244615436	-	protein_coding	12.1029
ENSG00000035862.12_3	TIMP2	chr17:76849059-76921469	-	protein_coding	14.4335
ENSG00000035928.15_3	RFC1	chr4:39289076-39367995	-	protein_coding	5.24903
ENSG00000036054.12_2	TBC1D23	chr3:99979844-100044095	+	protein_coding	2.98638
ENSG00000036257.12_3	CUL3	chr2:225334867-225450114	-	protein_coding	3.68747
ENSG00000036448.9_2	MYOM2	chr8:1993155-2113475	+	protein_coding	2.87952
ENSG00000036549.12_3	ZZZ3	chr1:78028101-78149104	-	protein_coding	1.12865
ENSG00000036672.15_3	USP2	chr11:119225925-119252436	-	protein_coding	10.6146
ENSG00000037042.8_2	TUBG2	chr17:40811323-40819024	+	protein_coding	16.8813
ENSG00000037241.7_3	RPL26L1	chr5:172385732-172396774	+	protein_coding	85.8635
ENSG00000037280.15_3	FLT4	chr5:180028506-180076624	-	protein_coding	12.4581
ENSG00000037474.14_2	NSUN2	chr5:6599352-6633404	-	protein_coding	15.7497
ENSG00000037637.10_3	FBXO42	chr1:16573334-16678949	-	protein_coding	3.34402
ENSG00000037749.11_3	MFAP3	chr5:153418466-153600038	+	protein_coding	0.274405
ENSG00000037757.13_3	MRI1	chr19:13875346-13885096	+	protein_coding	25.2168
ENSG00000037897.16_3	METTL1	chr12:58162254-58166576	-	protein_coding	10.4887
ENSG00000037965.5_3	HOXC8	chr12:54402890-54406146	+	protein_coding	3.40262
ENSG00000038002.8_2	AGA	chr4:178351924-178363657	-	protein_coding	7.61958
ENSG00000038210.12_3	PI4K2B	chr4:25235597-25280714	+	protein_coding	2.11494
ENSG00000038219.12_2	BOD1L1	chr4:13570362-13629347	-	protein_coding	1.18246
ENSG00000038274.16_2	MAT2B	chr5:162930120-162946342	+	protein_coding	6.85381
ENSG00000038358.14_3	EDC4	chr16:67906926-67918406	+	protein_coding	15.0447
ENSG00000038382.18_2	TRIO	chr5:14143811-14532237	+	protein_coding	1.39005
ENSG00000038427.15_3	VCAN	chr5:82767284-82878122	+	protein_coding	2.0034
ENSG00000038532.14_3	CLEC16A	chr16:11038345-11276046	+	protein_coding	2.84483
ENSG00000039123.15_3	SKIV2L2	chr5:54603588-54721409	+	protein_coding	7.96662
ENSG00000039319.16_3	ZFYVE16	chr5:79703832-79775169	+	protein_coding	1.30789
ENSG00000039523.19_4	RIPOR1	chr16:67552321-67580691	+	protein_coding	10.1121
ENSG00000039560.13_2	RAI14	chr5:34656342-34832732	+	protein_coding	3.05207
ENSG00000039650.11_3	PNKP	chr19:50363139-50381608	-	protein_coding	12.2197
ENSG00000040199.18_3	PHLPP2	chr16:71671738-71758604	-	protein_coding	0.432446
ENSG00000040275.16_3	SPDL1	chr5:169010638-169031782	+	protein_coding	6.76502
ENSG00000040341.17_4	STAU2	chr8:74332604-74659943	-	protein_coding	1.76693
ENSG00000040487.12_3	PQLC2	chr1:19638820-19655794	+	protein_coding	6.91351
ENSG00000040531.14_3	CTNS	chr17:3539762-3564836	+	protein_coding	5.61887
ENSG00000040608.13_3	RTN4R	chr22:20228938-20270769	-	protein_coding	8.5617
ENSG00000040633.12_3	PHF23	chr17:7138347-7143041	-	protein_coding	25.8119
ENSG00000040933.15_2	INPP4A	chr2:99061317-99210853	+	protein_coding	1.15985
ENSG00000041357.15_2	PSMA4	chr15:78832747-78844761	+	protein_coding	14.0701
ENSG00000041802.10_2	LSG1	chr3:194361517-194393206	-	protein_coding	10.8089
ENSG00000041880.14_3	PARP3	chr3:51976361-51982883	+	protein_coding	2.5742
ENSG00000041982.15_3	TNC	chr9:117781857-117880536	-	protein_coding	0.678666
ENSG00000041988.15_4	THAP3	chr1:6684926-6695646	+	protein_coding	5.87031
ENSG00000042088.13_3	TDP1	chr14:90421283-90511112	+	protein_coding	5.35133
ENSG00000042286.14_2	AIFM2	chr10:71857979-71892690	-	protein_coding	0.526591
ENSG00000042317.16_3	SPATA7	chr14:88851268-88936694	+	protein_coding	0.650066
ENSG00000042429.11_3	MED17	chr11:93517393-93548129	+	protein_coding	1.04908
ENSG00000042445.13_3	RETSAT	chr2:85569211-85581743	-	protein_coding	6.08338
ENSG00000042493.15_2	CAPG	chr2:85621871-85645555	-	protein_coding	7.04298
ENSG00000042753.11_2	AP2S1	chr19:47341393-47354249	-	protein_coding	99.0301
ENSG00000043039.6_2	BARX2	chr11:129245835-129322174	+	protein_coding	8.7059
ENSG00000043093.13_3	DCUN1D1	chr3:182655862-182703741	-	protein_coding	1.77996
ENSG00000043143.20_2	JADE2	chr5:133860003-133918920	+	protein_coding	0.893483
ENSG00000043355.11_3	ZIC2	chr13:100634026-100639027	+	protein_coding	28.0406
ENSG00000043514.15_2	TRIT1	chr1:40306694-40349183	-	protein_coding	5.62517
ENSG00000043591.5_3	ADRB1	chr10:115803815-115806667	+	protein_coding	0.284126
ENSG00000044090.8_2	CUL7	chr6:43005355-43021683	-	protein_coding	5.00164
ENSG00000044115.20_3	CTNNA1	chr5:137946656-138270723	+	protein_coding	20.1269
ENSG00000044446.11_2	PHKA2	chrX:18910418-19002716	-	protein_coding	3.16053
ENSG00000044459.14_3	CNTLN	chr9:17134980-17503921	+	protein_coding	0.904579
ENSG00000044524.10_2	EPHA3	chr3:89156674-89531284	+	protein_coding	0.260666
ENSG00000044574.7_2	HSPA5	chr9:127997132-128003609	-	protein_coding	172.515
ENSG00000046604.12_2	DSG2	chr18:29078006-29128971	+	protein_coding	13.2788
ENSG00000046647.13_2	GEMIN8	chrX:14026398-14048012	-	protein_coding	6.79373
ENSG00000046651.14_3	OFD1	chrX:13752864-13787472	+	protein_coding	2.57811
ENSG00000046653.14_3	GPM6B	chrX:13789150-13956757	-	protein_coding	1.81051
ENSG00000047056.14_2	WDR37	chr10:1095478-1178237	+	protein_coding	1.93267
ENSG00000047188.15_2	YTHDC2	chr5:112849380-112930982	+	protein_coding	2.17001
ENSG00000047230.14_2	CTPS2	chrX:16606126-16731059	-	protein_coding	2.8716
ENSG00000047249.17_4	ATP6V1H	chr8:54628117-54756118	-	protein_coding	5.78865
ENSG00000047315.15_2	POLR2B	chr4:57843888-57897334	+	protein_coding	22.3121
ENSG00000047346.12_3	FAM214A	chr15:52873514-53002014	-	protein_coding	0.239337
ENSG00000047410.13_2	TPR	chr1:186280784-186344825	-	protein_coding	11.3098
ENSG00000047578.12_4	KIAA0556	chr16:27561454-27791690	+	protein_coding	1.63192
ENSG00000047579.19_2	DTNBP1	chr6:15523032-15663289	-	protein_coding	15.3639
ENSG00000047597.5_3	XK	chrX:37545012-37591383	+	protein_coding	0.40192
ENSG00000047621.11_3	C12orf4	chr12:4596894-4647674	-	protein_coding	1.75177
ENSG00000047634.14_3	SCML1	chrX:17755569-17773108	+	protein_coding	8.29021
ENSG00000047849.21_4	MAP4	chr3:47892180-48130762	-	protein_coding	20.698
ENSG00000047932.13_3	GOPC	chr6:117881432-117923705	-	protein_coding	5.38127
ENSG00000048028.11_3	USP28	chr11:113668596-113746292	-	protein_coding	5.04743
ENSG00000048140.17_3	TSPAN17	chr5:176074388-176086055	+	protein_coding	5.34152
ENSG00000048162.20_3	NOP16	chr5:175810941-175815976	-	protein_coding	29.3306
ENSG00000048342.15_3	CC2D2A	chr4:15471489-15603180	+	protein_coding	1.74951
ENSG00000048392.11_2	RRM2B	chr8:103216730-103251346	-	protein_coding	1.02864
ENSG00000048405.9_3	ZNF800	chr7:126986844-127071978	-	protein_coding	0.422346
ENSG00000048471.13_3	SNX29	chr16:12070594-12668146	+	protein_coding	1.20952
ENSG00000048544.5_2	MRPS10	chr6:42174539-42185603	-	protein_coding	19.8624
ENSG00000048649.13_3	RSF1	chr11:77371041-77532063	-	protein_coding	1.26354
ENSG00000048707.13_3	VPS13D	chr1:12290124-12572099	+	protein_coding	0.9656
ENSG00000048740.18_3	CELF2	chr10:10840360-11378674	+	protein_coding	0.848921
ENSG00000048828.16_3	FAM120A	chr9:96214004-96328389	+	protein_coding	11.5687
ENSG00000048991.16_2	R3HDM1	chr2:136289025-136482840	+	protein_coding	5.86816
ENSG00000049089.13_3	COL9A2	chr1:40766159-40783488	-	protein_coding	1.08697
ENSG00000049130.14_2	KITLG	chr12:88886570-88974628	-	protein_coding	0.925935
ENSG00000049167.13_3	ERCC8	chr5:60169658-60240900	-	protein_coding	1.7163
ENSG00000049239.12_2	H6PD	chr1:9294834-9331396	+	protein_coding	1.68571
ENSG00000049245.12_3	VAMP3	chr1:7831329-7841492	+	protein_coding	26.4742
ENSG00000049249.8_3	TNFRSF9	chr1:7975954-8003225	-	protein_coding	0.926495
ENSG00000049323.15_2	LTBP1	chr2:33172039-33624576	+	protein_coding	4.99891
ENSG00000049449.8_3	RCN1	chr11:31833939-32127301	+	protein_coding	15.4631
ENSG00000049540.16_3	ELN	chr7:73442119-73484237	+	protein_coding	0.385699
ENSG00000049541.10_3	RFC2	chr7:73645829-73668788	-	protein_coding	48.1084
ENSG00000049618.22_3	ARID1B	chr6:157098508-157531913	+	protein_coding	0.698979
ENSG00000049656.13_2	CLPTM1L	chr5:1317859-1345214	-	protein_coding	8.57463
ENSG00000049759.17_3	NEDD4L	chr18:55711599-56068772	+	protein_coding	1.73787
ENSG00000049768.14_2	FOXP3	chrX:49106897-49121288	-	protein_coding	1.15552
ENSG00000049769.12_3	PPP1R3F	chrX:49126306-49157940	+	protein_coding	0.845095
ENSG00000049860.13_3	HEXB	chr5:73935848-74018472	+	protein_coding	6.94689
ENSG00000049883.14_3	PTCD2	chr5:71616194-71664222	+	protein_coding	0.846479
ENSG00000050130.17_2	JKAMP	chr14:59951161-59972128	+	protein_coding	1.5394
ENSG00000050165.17_2	DKK3	chr11:11984653-12031316	-	protein_coding	1.94007
ENSG00000050344.8_2	NFE2L3	chr7:26191860-26226745	+	protein_coding	9.72306
ENSG00000050393.11_3	MCUR1	chr6:13786789-13814800	-	protein_coding	8.03453
ENSG00000050405.13_3	LIMA1	chr12:50569571-50677329	-	protein_coding	2.84386
ENSG00000050426.15_4	LETMD1	chr12:51441745-51454207	+	protein_coding	3.14032
ENSG00000050555.17_3	LAMC3	chr9:133884469-133969860	+	protein_coding	2.14563
ENSG00000050748.17_4	MAPK9	chr5:179660143-179719099	-	protein_coding	2.96357
ENSG00000050767.15_3	COL23A1	chr5:177664619-178017556	-	protein_coding	3.33569
ENSG00000050820.16_4	BCAR1	chr16:75262085-75301951	-	protein_coding	7.22241
ENSG00000051009.10_2	FAM160A2	chr11:6232565-6255941	-	protein_coding	3.35315
ENSG00000051108.14_4	HERPUD1	chr16:56965960-56978775	+	protein_coding	13.9992
ENSG00000051128.18_3	HOMER3	chr19:19040010-19052070	-	protein_coding	6.90698
ENSG00000051180.16_2	RAD51	chr15:40986972-41024537	+	protein_coding	12.3671
ENSG00000051341.13_2	POLQ	chr3:121150274-121265488	-	protein_coding	1.25514
ENSG00000051382.8_2	PIK3CB	chr3:138371541-138553780	-	protein_coding	1.0546
ENSG00000051523.10_3	CYBA	chr16:88709691-88717560	-	protein_coding	78.392
ENSG00000051596.9_3	THOC3	chr5:175344876-175461683	-	protein_coding	32.9245
ENSG00000051620.10_2	HEBP2	chr6:138724668-138743334	+	protein_coding	8.89021
ENSG00000051825.14_4	MPHOSPH9	chr12:123636867-123728561	-	protein_coding	0.734434
ENSG00000052126.14_3	PLEKHA5	chr12:19282686-19529334	+	protein_coding	1.09556
ENSG00000052344.15_2	PRSS8	chr16:31142754-31147083	-	protein_coding	2.94041
ENSG00000052723.11_3	SIKE1	chr1:115312100-115323306	-	protein_coding	3.60111
ENSG00000052749.13_4	RRP12	chr10:99116115-99185833	-	protein_coding	8.24902
ENSG00000052795.12_3	FNIP2	chr4:159690290-159829201	+	protein_coding	0.436118
ENSG00000052802.12_3	MSMO1	chr4:166248775-166264312	+	protein_coding	8.03166
ENSG00000052841.14_3	TTC17	chr11:43380482-43516483	+	protein_coding	3.15094
ENSG00000052850.5_2	ALX4	chr11:44281994-44331716	-	protein_coding	6.95635
ENSG00000053254.15_3	FOXN3	chr14:89591215-90085493	-	protein_coding	2.02855
ENSG00000053371.12_3	AKR7A2	chr1:19630459-19638640	-	protein_coding	44.1762
ENSG00000053372.4_2	MRTO4	chr1:19578033-19586622	+	protein_coding	52.5494
ENSG00000053501.12_2	USE1	chr19:17326155-17330638	+	protein_coding	15.9808
ENSG00000053747.15_3	LAMA3	chr18:21269407-21535030	+	protein_coding	1.2973
ENSG00000053770.11_3	AP5M1	chr14:57735627-57765460	+	protein_coding	0.607301
ENSG00000053900.10_2	ANAPC4	chr4:25378835-25420120	+	protein_coding	1.15407
ENSG00000053918.15_3	KCNQ1	chr11:2465914-2870339	+	protein_coding	1.79494
ENSG00000054116.11_2	TRAPPC3	chr1:36602171-36621654	-	protein_coding	15.0393
ENSG00000054118.13_3	THRAP3	chr1:36690017-36770958	+	protein_coding	74.2225
ENSG00000054148.17_3	PHPT1	chr9:139743176-139745479	+	protein_coding	72.9105
ENSG00000054267.21_3	ARID4B	chr1:235294949-235491534	-	protein_coding	1.27586
ENSG00000054277.13_3	OPN3	chr1:241753404-241840678	-	protein_coding	0.680011
ENSG00000054282.15_2	SDCCAG8	chr1:243419336-243663394	+	protein_coding	2.78668
ENSG00000054392.12_3	HHAT	chr1:210501596-210849638	+	protein_coding	0.73477
ENSG00000054523.17_3	KIF1B	chr1:10270863-10441661	+	protein_coding	2.11321
ENSG00000054598.6_2	FOXC1	chr6:1610207-1614132	+	protein_coding	27.7468
ENSG00000054611.13_2	TBC1D22A	chr22:47158514-47571342	+	protein_coding	7.09354
ENSG00000054654.16_3	SYNE2	chr14:64319701-64693151	+	protein_coding	0.778297
ENSG00000054690.13_2	PLEKHH1	chr14:68000018-68056329	+	protein_coding	1.05853
ENSG00000054793.13_3	ATP9A	chr20:50213053-50385173	-	protein_coding	2.31579
ENSG00000054965.10_2	FAM168A	chr11:73111532-73309234	-	protein_coding	7.70009
ENSG00000054967.12_2	RELT	chr11:73087309-73108519	+	protein_coding	2.89421
ENSG00000054983.16_3	GALC	chr14:88304164-88460009	-	protein_coding	0.4203
ENSG00000055044.10_2	NOP58	chr2:203130439-203168389	+	protein_coding	27.9941
ENSG00000055070.16_2	SZRD1	chr1:16679070-16724640	+	protein_coding	45.18
ENSG00000055118.14_2	KCNH2	chr7:150642049-150675403	-	protein_coding	4.55654
ENSG00000055130.15_2	CUL1	chr7:148395006-148498128	+	protein_coding	24.8499
ENSG00000055147.18_3	FAM114A2	chr5:153369688-153418496	-	protein_coding	2.36746
ENSG00000055163.19_3	CYFIP2	chr5:156693089-156822603	+	protein_coding	6.22733
ENSG00000055208.18_3	TAB2	chr6:149539777-149732749	+	protein_coding	3.78871
ENSG00000055211.12_2	GINM1	chr6:149887430-149912884	+	protein_coding	8.62011
ENSG00000055332.16_3	EIF2AK2	chr2:37326353-37384208	-	protein_coding	1.72692
ENSG00000055483.19_4	USP36	chr17:76783463-76837523	-	protein_coding	5.26611
ENSG00000055609.17_3	KMT2C	chr7:151832007-152133090	-	protein_coding	1.22613
ENSG00000055917.15_2	PUM2	chr2:20448452-20551995	-	protein_coding	3.0385
ENSG00000055950.16_3	MRPL43	chr10:102729215-102747272	-	protein_coding	14.594
ENSG00000056050.6_3	HPF1	chr4:170650616-170679104	-	protein_coding	13.9405
ENSG00000056097.15_2	ZFR	chr5:32354456-32444867	-	protein_coding	9.72181
ENSG00000056277.15_2	ZNF280C	chrX:129336685-129402873	-	protein_coding	3.80518
ENSG00000056291.17_2	NPFFR2	chr4:72897521-73013784	+	protein_coding	0.247143
ENSG00000056487.15_3	PHF21B	chr22:45277042-45405880	-	protein_coding	1.59136
ENSG00000056558.10_2	TRAF1	chr9:123664671-123691451	-	protein_coding	0.413816
ENSG00000056586.15_3	RC3H2	chr9:125606835-125667620	-	protein_coding	1.27196
ENSG00000056736.9_3	IL17RB	chr3:53880607-53899827	+	protein_coding	2.9694
ENSG00000056972.18_3	TRAF3IP2	chr6:111877657-111927481	-	protein_coding	3.26574
ENSG00000056998.19_2	GYG2	chrX:2746829-2800861	+	protein_coding	4.20558
ENSG00000057019.15_3	DCBLD2	chr3:98514785-98620533	-	protein_coding	1.32956
ENSG00000057252.12_2	SOAT1	chr1:179262849-179327815	+	protein_coding	5.4266
ENSG00000057294.14_3	PKP2	chr12:32943679-33049774	-	protein_coding	1.59669
ENSG00000057608.16_3	GDI2	chr10:5807186-5884095	-	protein_coding	41.4362
ENSG00000057663.14_3	ATG5	chr6:106493298-106773666	-	protein_coding	1.87524
ENSG00000057704.12_3	TMCC3	chr12:94960900-95044338	-	protein_coding	1.30771
ENSG00000057757.9_3	PITHD1	chr1:24104895-24114722	+	protein_coding	19.0367
ENSG00000057935.13_2	MTA3	chr2:42721709-42984087	+	protein_coding	5.30693
ENSG00000058056.8_2	USP13	chr3:179370543-179507189	+	protein_coding	2.43723
ENSG00000058063.15_3	ATP11B	chr3:182511288-182639423	+	protein_coding	1.6054
ENSG00000058091.16_3	CDK14	chr7:90095738-90839905	+	protein_coding	1.05281
ENSG00000058262.9_2	SEC61A1	chr3:127770484-127790526	+	protein_coding	40.1719
ENSG00000058272.16_3	PPP1R12A	chr12:80167343-80329240	-	protein_coding	1.4286
ENSG00000058335.15_2	RASGRF1	chr15:79252289-79383115	-	protein_coding	0.714477
ENSG00000058404.19_3	CAMK2B	chr7:44256749-44374176	-	protein_coding	0.46396
ENSG00000058453.16_3	CROCC	chr1:17066768-17299474	+	protein_coding	3.86446
ENSG00000058600.15_4	POLR3E	chr16:22308696-22346424	+	protein_coding	6.29061
ENSG00000058668.14_3	ATP2B4	chr1:203595689-203713209	+	protein_coding	1.03958
ENSG00000058673.16_3	ZC3H11A	chr1:203764782-203824127	+	protein_coding	0.676525
ENSG00000058729.10_3	RIOK2	chr5:96496571-96518964	-	protein_coding	2.84968
ENSG00000058799.14_2	YIPF1	chr1:54317392-54355507	-	protein_coding	8.60883
ENSG00000058804.11_2	NDC1	chr1:54231133-54304533	-	protein_coding	8.9021
ENSG00000059122.16_2	FLYWCH1	chr16:2961938-3001209	+	protein_coding	7.32163
ENSG00000059145.18_4	UNKL	chr16:1413206-1464752	-	protein_coding	1.50059
ENSG00000059377.16_2	TBXAS1	chr7:139476850-139720125	+	protein_coding	0.603285
ENSG00000059573.8_2	ALDH18A1	chr10:97365686-97416463	-	protein_coding	55.3694
ENSG00000059588.9_2	TARBP1	chr1:234527059-234614849	-	protein_coding	2.78971
ENSG00000059691.11_3	GATB	chr4:152591656-152682175	-	protein_coding	5.32517
ENSG00000059728.10_3	MXD1	chr2:70124820-70170077	+	protein_coding	0.459571
ENSG00000059758.7_3	CDK17	chr12:96672039-96794338	-	protein_coding	0.923893
ENSG00000059769.19_3	DNAJC25	chr9:114393632-114416631	+	protein_coding	1.72716
ENSG00000059804.15_2	SLC2A3	chr12:8071826-8088871	-	protein_coding	0.286674
ENSG00000060069.16_2	CTDP1	chr18:77439801-77516623	+	protein_coding	4.32874
ENSG00000060138.12_2	YBX3	chr12:10851688-10875911	-	protein_coding	35.2518
ENSG00000060237.16_3	WNK1	chr12:861759-1020618	+	protein_coding	1.9878
ENSG00000060339.13_3	CCAR1	chr10:70480769-70552134	+	protein_coding	8.05531
ENSG00000060491.16_3	OGFR	chr20:61436187-61445352	+	protein_coding	12.9861
ENSG00000060642.10_3	PIGV	chr1:27113963-27124889	+	protein_coding	2.90068
ENSG00000060656.19_2	PTPRU	chr1:29563028-29653325	+	protein_coding	56.8879
ENSG00000060688.12_3	SNRNP40	chr1:31732415-31769629	-	protein_coding	33.8744
ENSG00000060749.14_2	QSER1	chr11:32914724-33014862	+	protein_coding	2.46374
ENSG00000060762.18_2	MPC1	chr6:166778407-166796501	-	protein_coding	36.1005
ENSG00000060971.17_3	ACAA1	chr3:38144620-38178733	-	protein_coding	4.17767
ENSG00000060982.14_2	BCAT1	chr12:24962956-25102393	-	protein_coding	3.95454
ENSG00000061273.17_3	HDAC7	chr12:48176505-48226915	-	protein_coding	3.57805
ENSG00000061337.15_3	LZTS1	chr8:20103676-20161474	-	protein_coding	1.20041
ENSG00000061455.10_2	PRDM6	chr5:122424816-122529960	+	protein_coding	1.15301
ENSG00000061656.9_3	SPAG4	chr20:34203814-34208971	+	protein_coding	1.83851
ENSG00000061676.14_2	NCKAP1	chr2:183773843-183903586	-	protein_coding	1.5263
ENSG00000061794.12_3	MRPS35	chr12:27863706-27909228	+	protein_coding	14.0853
ENSG00000061918.12_2	GUCY1B3	chr4:156680144-156728743	+	protein_coding	5.89539
ENSG00000061936.9_3	SFSWAP	chr12:132195626-132284282	+	protein_coding	10.3166
ENSG00000061938.17_4	TNK2	chr3:195590235-195638816	-	protein_coding	2.91356
ENSG00000061987.15_3	MON2	chr12:62860597-62994259	+	protein_coding	0.55099
ENSG00000062038.13_3	CDH3	chr16:68670092-68756519	+	protein_coding	3.69102
ENSG00000062194.15_2	GPBP1	chr5:56469775-56560506	+	protein_coding	4.78841
ENSG00000062282.14_3	DGAT2	chr11:75470557-75512580	+	protein_coding	1.2472
ENSG00000062485.18_3	CS	chr12:56665483-56694176	-	protein_coding	57.2678
ENSG00000062524.15_2	LTK	chr15:41795836-41806085	-	protein_coding	0.961482
ENSG00000062582.13_3	MRPS24	chr7:43906157-43909492	-	protein_coding	32.2117
ENSG00000062598.17_4	ELMO2	chr20:44994688-45061624	-	protein_coding	5.00151
ENSG00000062650.18_3	WAPL	chr10:88195013-88281572	-	protein_coding	4.65449
ENSG00000062716.12_3	VMP1	chr17:57784553-57919616	+	protein_coding	7.02898
ENSG00000062725.9_2	APPBP2	chr17:58520510-58603580	-	protein_coding	1.48036
ENSG00000062822.12_3	POLD1	chr19:50887461-50921275	+	protein_coding	36.6796
ENSG00000063046.17_3	EIF4B	chr12:53399942-53435993	+	protein_coding	98.9176
ENSG00000063169.10_4	BICRA	chr19:48111453-48206534	+	protein_coding	5.44027
ENSG00000063176.15_4	SPHK2	chr19:49122548-49133974	+	protein_coding	3.28219
ENSG00000063177.12_3	RPL18	chr19:49118585-49122793	-	protein_coding	292.726
ENSG00000063180.8_2	CA11	chr19:49141199-49149569	-	protein_coding	20.1783
ENSG00000063241.7_3	ISOC2	chr19:55964352-55973710	-	protein_coding	15.983
ENSG00000063244.12_3	U2AF2	chr19:56165512-56186081	+	protein_coding	127.345
ENSG00000063245.14_3	EPN1	chr19:56186592-56221224	+	protein_coding	14.6125
ENSG00000063322.13_2	MED29	chr19:39881943-39891277	+	protein_coding	5.18114
ENSG00000063438.16_3	AHRR	chr5:304291-438406	+	protein_coding	1.46218
ENSG00000063587.13_3	ZNF275	chrX:152599613-152625568	+	protein_coding	3.27797
ENSG00000063601.16_3	MTMR1	chrX:149861444-149933576	+	protein_coding	8.93344
ENSG00000063660.8_3	GPC1	chr2:241375088-241407495	+	protein_coding	9.47363
ENSG00000063761.15_3	ADCK1	chr14:78266426-78401355	+	protein_coding	3.97942
ENSG00000063854.12_2	HAGH	chr16:1845621-1877195	-	protein_coding	10.3909
ENSG00000063978.15_3	RNF4	chr4:2463947-2627047	+	protein_coding	1.26908
ENSG00000064012.21_4	CASP8	chr2:202098166-202152434	+	protein_coding	1.31269
ENSG00000064042.17_3	LIMCH1	chr4:41361624-41702061	+	protein_coding	0.712956
ENSG00000064102.14_2	INTS13	chr12:27058114-27091259	-	protein_coding	14.1083
ENSG00000064115.10_3	TM7SF3	chr12:27126128-27167367	-	protein_coding	5.17449
ENSG00000064195.7_2	DLX3	chr17:48067369-48072588	-	protein_coding	5.48066
ENSG00000064199.6_2	SPA17	chr11:124543694-124567414	+	protein_coding	5.12077
ENSG00000064205.10_2	WISP2	chr20:43343485-43357150	+	protein_coding	0.00484611
ENSG00000064225.12_3	ST3GAL6	chr3:98451080-98540045	+	protein_coding	1.53504
ENSG00000064300.8_3	NGFR	chr17:47572655-47592379	+	protein_coding	5.53695
ENSG00000064309.14_2	CDON	chr11:125825691-125933230	-	protein_coding	1.86558
ENSG00000064313.11_3	TAF2	chr8:120743015-120845103	-	protein_coding	1.56032
ENSG00000064393.15_2	HIPK2	chr7:139246316-139477577	-	protein_coding	3.34255
ENSG00000064419.13_2	TNPO3	chr7:128594234-128695227	-	protein_coding	23.553
ENSG00000064489.22_3	BORCS8-MEF2B	chr19:19256376-19302967	-	protein_coding	4.04968
ENSG00000064490.13_3	RFXANK	chr19:19303038-19312678	+	protein_coding	20.2807
ENSG00000064545.14_4	TMEM161A	chr19:19229978-19249322	-	protein_coding	14.7349
ENSG00000064547.13_3	LPAR2	chr19:19734477-19739739	-	protein_coding	1.24855
ENSG00000064601.16_2	CTSA	chr20:44518783-44527459	+	protein_coding	14.8424
ENSG00000064607.16_2	SUGP2	chr19:19101697-19144832	-	protein_coding	10.0578
ENSG00000064651.13_3	SLC12A2	chr5:127419458-127525380	+	protein_coding	0.707679
ENSG00000064652.10_2	SNX24	chr5:122179134-122365049	+	protein_coding	3.12574
ENSG00000064655.18_4	EYA2	chr20:45523263-45817492	+	protein_coding	8.50296
ENSG00000064666.14_3	CNN2	chr19:1026580-1039067	+	protein_coding	27.31
ENSG00000064687.12_1	ABCA7	chr19:1040100-1065571	+	protein_coding	6.90018
ENSG00000064692.18_3	SNCAIP	chr5:121647049-121799914	+	protein_coding	0.489044
ENSG00000064703.11_2	DDX20	chr1:112297867-112310638	+	protein_coding	1.87325
ENSG00000064726.9_3	BTBD1	chr15:83685174-83736106	-	protein_coding	10.6647
ENSG00000064763.10_3	FAR2	chr12:29302036-29493913	+	protein_coding	3.37229
ENSG00000064932.15_2	SBNO2	chr19:1107635-1174282	-	protein_coding	9.13336
ENSG00000064933.17_3	PMS1	chr2:190648811-190742355	+	protein_coding	2.29794
ENSG00000064961.18_3	HMG20B	chr19:3572775-3579086	+	protein_coding	42.031
ENSG00000064995.16_2	TAF11	chr6:34845555-34855866	-	protein_coding	29.638
ENSG00000064999.13_3	ANKS1A	chr6:34857042-35059190	+	protein_coding	5.05791
ENSG00000065000.15_3	AP3D1	chr19:2100987-2164464	-	protein_coding	24.0245
ENSG00000065029.14_3	ZNF76	chr6:35226686-35263762	+	protein_coding	6.24077
ENSG00000065054.13_3	SLC9A3R2	chr16:2075357-2089027	+	protein_coding	29.164
ENSG00000065057.7_3	NTHL1	chr16:2089816-2097867	-	protein_coding	24.4641
ENSG00000065060.16_2	UHRF1BP1	chr6:34759792-34850915	+	protein_coding	1.82871
ENSG00000065135.10_3	GNAI3	chr1:110091233-110160943	+	protein_coding	1.57704
ENSG00000065150.18_3	IPO5	chr13:98605912-98676551	+	protein_coding	24.7109
ENSG00000065154.11_2	OAT	chr10:126085872-126107545	-	protein_coding	35.1196
ENSG00000065183.15_2	WDR3	chr1:118472343-118509165	+	protein_coding	11.9936
ENSG00000065243.19_3	PKN2	chr1:89149905-89301938	+	protein_coding	3.0023
ENSG00000065268.10_3	WDR18	chr19:984271-998437	+	protein_coding	48.3353
ENSG00000065308.4_2	TRAM2	chr6:52362200-52441713	-	protein_coding	2.36909
ENSG00000065320.8_2	NTN1	chr17:8924859-9147317	+	protein_coding	10.6029
ENSG00000065328.16_2	MCM10	chr10:13203554-13253104	+	protein_coding	9.38346
ENSG00000065357.19_3	DGKA	chr12:56321103-56347811	+	protein_coding	0.908072
ENSG00000065361.14_3	ERBB3	chr12:56473641-56497289	+	protein_coding	1.0054
ENSG00000065427.14_4	KARS	chr16:75661372-75682541	-	protein_coding	61.3393
ENSG00000065457.10_3	ADAT1	chr16:75630879-75657198	-	protein_coding	1.45995
ENSG00000065485.19_3	PDIA5	chr3:122785909-122944074	+	protein_coding	16.9023
ENSG00000065491.8_2	TBC1D22B	chr6:37225548-37300746	+	protein_coding	7.7614
ENSG00000065518.7_2	NDUFB4	chr3:120315156-120321347	+	protein_coding	48.135
ENSG00000065526.10_2	SPEN	chr1:16174359-16266955	+	protein_coding	13.4411
ENSG00000065534.18_3	MYLK	chr3:123328896-123603178	-	protein_coding	0.696752
ENSG00000065548.17_3	ZC3H15	chr2:187350883-187374090	+	protein_coding	15.0661
ENSG00000065559.14_3	MAP2K4	chr17:11924141-12047147	+	protein_coding	1.65148
ENSG00000065600.12_3	TMEM206	chr1:212537273-212588243	-	protein_coding	19.1304
ENSG00000065613.13_3	SLK	chr10:105726959-105788991	+	protein_coding	3.04874
ENSG00000065615.13_2	CYB5R4	chr6:84569362-84677143	+	protein_coding	0.668089
ENSG00000065621.14_2	GSTO2	chr10:106028631-106064703	+	protein_coding	0.61181
ENSG00000065665.20_3	SEC61A2	chr10:12171636-12211960	+	protein_coding	1.92372
ENSG00000065675.14_2	PRKCQ	chr10:6469105-6622263	-	protein_coding	4.33622
ENSG00000065717.14_3	TLE2	chr19:2997636-3047633	-	protein_coding	7.82987
ENSG00000065802.11_2	ASB1	chr2:239335383-239360891	+	protein_coding	2.42727
ENSG00000065809.13_3	FAM107B	chr10:14560556-14816896	-	protein_coding	1.78583
ENSG00000065833.8_2	ME1	chr6:83920108-84140790	-	protein_coding	5.79265
ENSG00000065882.15_3	TBC1D1	chr4:37892708-38140796	+	protein_coding	4.19682
ENSG00000065883.14_2	CDK13	chr7:39989636-40136733	+	protein_coding	3.48309
ENSG00000065911.11_2	MTHFD2	chr2:74425689-74444692	+	protein_coding	45.3459
ENSG00000065923.9_3	SLC9A7	chrX:46458687-46618607	-	protein_coding	1.60025
ENSG00000065970.8_2	FOXJ2	chr12:8185299-8208099	+	protein_coding	3.03156
ENSG00000065978.18_3	YBX1	chr1:43148098-43168020	+	protein_coding	1402.13
ENSG00000065989.15_2	PDE4A	chr19:10527449-10580307	+	protein_coding	5.64263
ENSG00000066027.11_3	PPP2R5A	chr1:212458879-212535205	+	protein_coding	3.61891
ENSG00000066044.14_3	ELAVL1	chr19:8023463-8070543	-	protein_coding	34.6928
ENSG00000066084.12_2	DIP2B	chr12:50898768-51142450	+	protein_coding	1.96168
ENSG00000066117.14_2	SMARCD1	chr12:50478755-50494495	+	protein_coding	16.2712
ENSG00000066135.12_2	KDM4A	chr1:44115829-44171186	+	protein_coding	17.4273
ENSG00000066136.20_3	NFYC	chr1:41157320-41237275	+	protein_coding	9.85305
ENSG00000066248.14_2	NGEF	chr2:233743396-233877982	-	protein_coding	7.75516
ENSG00000066279.17_3	ASPM	chr1:197053258-197115824	-	protein_coding	3.15156
ENSG00000066322.14_3	ELOVL1	chr1:43829068-43833745	-	protein_coding	20.2846
ENSG00000066379.14_2	ZNRD1	chr6:30026676-30032686	+	protein_coding	7.69511
ENSG00000066382.16_2	MPPED2	chr11:30406040-30608419	-	protein_coding	0.649948
ENSG00000066422.4_2	ZBTB11	chr3:101367733-101396339	-	protein_coding	2.22517
ENSG00000066455.12_2	GOLGA5	chr14:93260576-93306308	+	protein_coding	8.26437
ENSG00000066468.22_3	FGFR2	chr10:123237848-123357972	-	protein_coding	2.32945
ENSG00000066557.5_2	LRRC40	chr1:70610488-70671303	-	protein_coding	5.6913
ENSG00000066583.11_3	ISOC1	chr5:128430444-128449721	+	protein_coding	34.9732
ENSG00000066629.16_3	EML1	chr14:100204030-100408397	+	protein_coding	1.10496
ENSG00000066651.18_3	TRMT11	chr6:126307576-126360422	+	protein_coding	3.19596
ENSG00000066654.13_3	THUMPD1	chr16:20714138-20753406	-	protein_coding	2.12544
ENSG00000066697.14_3	MSANTD3	chr9:103189438-103213993	+	protein_coding	4.59964
ENSG00000066735.14_3	KIF26A	chr14:104605060-104647231	+	protein_coding	8.29777
ENSG00000066739.11_2	ATG2B	chr14:96745539-96830207	-	protein_coding	0.491287
ENSG00000066777.8_3	ARFGEF1	chr8:68085746-68255912	-	protein_coding	1.00761
ENSG00000066827.15_2	ZFAT	chr8:135490031-135725292	-	protein_coding	2.19766
ENSG00000066855.15_2	MTFR1	chr8:66556969-66683496	+	protein_coding	5.75889
ENSG00000066926.10_2	FECH	chr18:55215515-55254004	-	protein_coding	5.67604
ENSG00000066933.15_3	MYO9A	chr15:72114630-72410918	-	protein_coding	0.249675
ENSG00000067057.16_3	PFKP	chr10:3108525-3179904	+	protein_coding	60.229
ENSG00000067064.10_3	IDI1	chr10:1085848-1095110	-	protein_coding	10.1362
ENSG00000067082.14_2	KLF6	chr10:3818188-3827473	-	protein_coding	2.69772
ENSG00000067113.16_3	PLPP1	chr5:54720682-54830878	-	protein_coding	6.14857
ENSG00000067141.16_2	NEO1	chr15:73344051-73597547	+	protein_coding	10.2711
ENSG00000067167.7_2	TRAM1	chr8:71485677-71520622	-	protein_coding	14.4674
ENSG00000067177.14_2	PHKA1	chrX:71798664-71934167	-	protein_coding	3.53531
ENSG00000067182.7_2	TNFRSF1A	chr12:6437923-6451280	-	protein_coding	7.77195
ENSG00000067191.15_2	CACNB1	chr17:37329709-37353956	-	protein_coding	1.52267
ENSG00000067208.14_3	EVI5	chr1:92974253-93257961	-	protein_coding	1.08509
ENSG00000067221.13_3	STOML1	chr15:74271264-74286963	-	protein_coding	0.856821
ENSG00000067225.17_4	PKM	chr15:72491370-72524163	-	protein_coding	192.164
ENSG00000067248.9_2	DHX29	chr5:54552073-54603550	-	protein_coding	2.33805
ENSG00000067334.13_2	DNTTIP2	chr1:94331839-94345474	-	protein_coding	5.41454
ENSG00000067365.14_3	METTL22	chr16:8715540-8743511	+	protein_coding	1.32572
ENSG00000067369.13_3	TP53BP1	chr15:43695259-43802926	-	protein_coding	2.69354
ENSG00000067445.20_4	TRO	chrX:54946895-54957864	+	protein_coding	2.13681
ENSG00000067533.5_2	RRP15	chr1:218458629-218511325	+	protein_coding	3.07456
ENSG00000067560.10_3	RHOA	chr3:49396578-49450431	-	protein_coding	149.355
ENSG00000067596.10_3	DHX8	chr17:41561233-41621831	+	protein_coding	8.35432
ENSG00000067606.16_3	PRKCZ	chr1:1981909-2116834	+	protein_coding	11.7345
ENSG00000067704.9_2	IARS2	chr1:220267444-220321383	+	protein_coding	26.7429
ENSG00000067829.18_3	IDH3G	chrX:153051221-153059978	-	protein_coding	139.628
ENSG00000067836.12_2	ROGDI	chr16:4846969-4852951	-	protein_coding	10.2719
ENSG00000067840.12_2	PDZD4	chrX:153067621-153096020	-	protein_coding	6.74641
ENSG00000067900.7_3	ROCK1	chr18:18526867-18691812	-	protein_coding	2.13915
ENSG00000067955.13_3	CBFB	chr16:67063019-67134961	+	protein_coding	8.27191
ENSG00000067992.12_3	PDK3	chrX:24483338-24557954	+	protein_coding	5.14222
ENSG00000068001.13_3	HYAL2	chr3:50355221-50360337	-	protein_coding	10.1452
ENSG00000068024.16_3	HDAC4	chr2:239969864-240323348	-	protein_coding	0.604864
ENSG00000068028.17_2	RASSF1	chr3:50367213-50378411	-	protein_coding	2.53312
ENSG00000068078.17_3	FGFR3	chr4:1795034-1810599	+	protein_coding	9.90007
ENSG00000068079.7_2	IFI35	chr17:41158742-41166473	+	protein_coding	3.33781
ENSG00000068097.14_3	HEATR6	chr17:58120555-58156292	-	protein_coding	5.85557
ENSG00000068120.14_3	COASY	chr17:40713485-40718295	+	protein_coding	25.197
ENSG00000068137.14_2	PLEKHH3	chr17:40819932-40829012	-	protein_coding	6.68497
ENSG00000068305.17_3	MEF2A	chr15:100105622-100256671	+	protein_coding	1.72508
ENSG00000068308.13_3	OTUD5	chrX:48779305-48815648	-	protein_coding	34.7596
ENSG00000068323.16_2	TFE3	chrX:48886237-48901012	-	protein_coding	14.2734
ENSG00000068354.15_3	TBC1D25	chrX:48397845-48420997	+	protein_coding	4.95097
ENSG00000068366.19_3	ACSL4	chrX:108867473-108976632	-	protein_coding	4.13078
ENSG00000068383.18_2	INPP5A	chr10:134351324-134596984	+	protein_coding	13.421
ENSG00000068394.10_2	GPKOW	chrX:48970327-48980151	-	protein_coding	59.8178
ENSG00000068400.13_3	GRIPAP1	chrX:48830131-48858675	-	protein_coding	9.64424
ENSG00000068438.14_2	FTSJ1	chrX:48334409-48344752	+	protein_coding	19.7181
ENSG00000068489.12_3	PRR11	chr17:57232860-57282066	+	protein_coding	4.67434
ENSG00000068615.17_3	REEP1	chr2:86441116-86565206	-	protein_coding	1.7952
ENSG00000068650.18_3	ATP11A	chr13:113344643-113541482	+	protein_coding	0.751317
ENSG00000068654.15_2	POLR1A	chr2:86247339-86333278	-	protein_coding	7.19283
ENSG00000068697.6_2	LAPTM4A	chr2:20232411-20251789	-	protein_coding	50.1052
ENSG00000068724.15_3	TTC7A	chr2:47143296-47303276	+	protein_coding	3.95698
ENSG00000068745.14_2	IP6K2	chr3:48725436-48777786	-	protein_coding	8.82133
ENSG00000068781.21_3	STON1-GTF2A1L	chr2:48757064-49003656	+	protein_coding	0.613865
ENSG00000068784.12_2	SRBD1	chr2:45615819-45839304	-	protein_coding	6.14431
ENSG00000068796.16_3	KIF2A	chr5:61601989-61833076	+	protein_coding	4.13792
ENSG00000068831.18_3	RASGRP2	chr11:64494383-64512928	-	protein_coding	2.81285
ENSG00000068878.14_2	PSME4	chr2:54091204-54197977	-	protein_coding	2.79207
ENSG00000068885.14_4	IFT80	chr3:159974774-160117668	-	protein_coding	1.43389
ENSG00000068903.19_3	SIRT2	chr19:39369195-39390502	-	protein_coding	11.9402
ENSG00000068912.13_3	ERLEC1	chr2:54014181-54045956	+	protein_coding	5.33036
ENSG00000068971.13_3	PPP2R5B	chr11:64685025-64701945	+	protein_coding	7.32764
ENSG00000068976.13_2	PYGM	chr11:64513861-64527769	-	protein_coding	0.51002
ENSG00000069011.15_2	PITX1	chr5:134363425-134370503	-	protein_coding	16.603
ENSG00000069188.16_2	SDK2	chr17:71330523-71640228	-	protein_coding	6.97837
ENSG00000069248.11_2	NUP133	chr1:229576007-229644088	-	protein_coding	13.6425
ENSG00000069275.12_2	NUCKS1	chr1:205681947-205719404	-	protein_coding	57.858
ENSG00000069329.16_3	VPS35	chr16:46690044-46723430	-	protein_coding	9.92834
ENSG00000069345.11_2	DNAJA2	chr16:46989274-47007699	-	protein_coding	25.8929
ENSG00000069399.14_3	BCL3	chr19:45250962-45263301	+	protein_coding	2.00217
ENSG00000069424.14_2	KCNAB2	chr1:6051526-6161253	+	protein_coding	1.72198
ENSG00000069482.6_2	GAL	chr11:68451247-68458643	+	protein_coding	114.991
ENSG00000069509.5_2	FUNDC1	chrX:44382885-44402247	-	protein_coding	12.0096
ENSG00000069535.13_2	MAOB	chrX:43625858-43741693	-	protein_coding	2.05568
ENSG00000069696.6_2	DRD4	chr11:637293-640706	+	protein_coding	0.63992
ENSG00000069702.10_2	TGFBR3	chr1:92145900-92371892	-	protein_coding	1.16181
ENSG00000069812.11_2	HES2	chr1:6472478-6484730	-	protein_coding	0.406939
ENSG00000069849.10_2	ATP1B3	chr3:141594966-141645356	+	protein_coding	59.796
ENSG00000069869.15_2	NEDD4	chr15:56119120-56285944	-	protein_coding	0.644435
ENSG00000069943.9_2	PIGB	chr15:55611158-55647846	+	protein_coding	0.538897
ENSG00000069956.11_3	MAPK6	chr15:52244303-52359569	+	protein_coding	1.89075
ENSG00000069966.18_2	GNB5	chr15:52407302-52483566	-	protein_coding	1.22507
ENSG00000069974.15_3	RAB27A	chr15:55495164-55611311	-	protein_coding	0.574631
ENSG00000069998.12_2	HDHD5	chr22:17618401-17646177	-	protein_coding	11.4384
ENSG00000070010.18_4	UFD1	chr22:19437433-19466738	-	protein_coding	11.3232
ENSG00000070018.8_2	LRP6	chr12:12268959-12419946	-	protein_coding	1.68857
ENSG00000070047.11_2	PHRF1	chr11:576486-612222	+	protein_coding	14.4221
ENSG00000070061.14_3	ELP1	chr9:111629797-111696396	-	protein_coding	6.81926
ENSG00000070081.15_3	NUCB2	chr11:17229700-17371521	+	protein_coding	4.17318
ENSG00000070087.13_3	PFN2	chr3:149682691-149768575	-	protein_coding	25.5472
ENSG00000070159.13_2	PTPN3	chr9:112137746-112260593	-	protein_coding	1.21692
ENSG00000070182.19_3	SPTB	chr14:65213001-65346601	-	protein_coding	1.22031
ENSG00000070214.15_2	SLC44A1	chr9:108006903-108201452	+	protein_coding	1.79316
ENSG00000070269.13_3	TMEM260	chr14:56955072-57117324	+	protein_coding	0.665426
ENSG00000070366.13_3	SMG6	chr17:1963133-2207065	-	protein_coding	3.30744
ENSG00000070367.15_2	EXOC5	chr14:57667225-57735726	-	protein_coding	1.08145
ENSG00000070371.15_3	CLTCL1	chr22:19166986-19279239	-	protein_coding	2.68082
ENSG00000070404.9_3	FSTL3	chr19:676365-683399	+	protein_coding	3.15718
ENSG00000070413.19_3	DGCR2	chr22:19023795-19109967	-	protein_coding	15.1281
ENSG00000070423.17_2	RNF126	chr19:647526-663277	-	protein_coding	22.7744
ENSG00000070444.14_2	MNT	chr17:2287354-2304412	-	protein_coding	4.62723
ENSG00000070476.14_2	ZXDC	chr3:126156444-126194762	-	protein_coding	5.41384
ENSG00000070495.14_2	JMJD6	chr17:74708914-74722881	-	protein_coding	12.4019
ENSG00000070501.11_2	POLB	chr8:42195972-42229326	+	protein_coding	6.84584
ENSG00000070540.12_2	WIPI1	chr17:66417089-66453654	-	protein_coding	1.2846
ENSG00000070601.9_3	FRMPD1	chr9:37650997-37746901	+	protein_coding	0.685348
ENSG00000070610.14_3	GBA2	chr9:35736863-35749225	-	protein_coding	6.35552
ENSG00000070614.14_3	NDST1	chr5:149865381-149937773	+	protein_coding	4.79513
ENSG00000070669.16_3	ASNS	chr7:97481430-97501854	-	protein_coding	89.3165
ENSG00000070718.11_3	AP3M2	chr8:42010464-42029191	+	protein_coding	3.40063
ENSG00000070731.10_3	ST6GALNAC2	chr17:74561461-74583038	-	protein_coding	0.383631
ENSG00000070756.15_3	PABPC1	chr8:101698044-101735037	-	protein_coding	118.466
ENSG00000070759.16_2	TESK2	chr1:45809555-45956838	-	protein_coding	2.50241
ENSG00000070761.7_2	CFAP20	chr16:58147492-58163354	-	protein_coding	33.8419
ENSG00000070770.8_3	CSNK2A2	chr16:58191811-58231824	-	protein_coding	15.4666
ENSG00000070785.16_3	EIF2B3	chr1:45316194-45452394	-	protein_coding	12.5557
ENSG00000070814.17_3	TCOF1	chr5:149737202-149779871	+	protein_coding	32.9648
ENSG00000070831.15_4	CDC42	chr1:22379120-22419439	+	protein_coding	64.2157
ENSG00000070882.12_3	OSBPL3	chr7:24836158-25021253	-	protein_coding	1.26228
ENSG00000070886.11_3	EPHA8	chr1:22890057-22930087	+	protein_coding	10.2956
ENSG00000070950.9_3	RAD18	chr3:8817088-9005457	-	protein_coding	2.13228
ENSG00000070961.15_2	ATP2B1	chr12:89981826-90103077	-	protein_coding	1.56909
ENSG00000071051.13_3	NCK2	chr2:106361354-106510730	+	protein_coding	4.2789
ENSG00000071054.16_3	MAP4K4	chr2:102313312-102511151	+	protein_coding	7.55647
ENSG00000071073.12_2	MGAT4A	chr2:99235569-99347589	-	protein_coding	0.325265
ENSG00000071082.10_2	RPL31	chr2:101618177-101640494	+	protein_coding	55.3511
ENSG00000071127.16_2	WDR1	chr4:10075963-10118573	-	protein_coding	27.8226
ENSG00000071189.21_2	SNX13	chr7:17830385-17980124	-	protein_coding	0.361813
ENSG00000071205.11_2	ARHGAP10	chr4:148653214-148993931	+	protein_coding	1.40191
ENSG00000071242.11_3	RPS6KA2	chr6:166822852-167319939	-	protein_coding	3.8949
ENSG00000071243.15_2	ING3	chr7:120590803-120617270	+	protein_coding	1.56279
ENSG00000071246.10_3	VASH1	chr14:77228532-77249358	+	protein_coding	6.66183
ENSG00000071282.11_2	LMCD1	chr3:8543393-8616359	+	protein_coding	1.61986
ENSG00000071462.11_4	BUD23	chr7:73097355-73119491	+	protein_coding	16.2892
ENSG00000071537.13_3	SEL1L	chr14:81937893-82000205	-	protein_coding	1.59248
ENSG00000071539.13_3	TRIP13	chr5:892758-919472	+	protein_coding	20.3752
ENSG00000071553.16_3	ATP6AP1	chrX:153656978-153664862	+	protein_coding	43.1818
ENSG00000071564.14_3	TCF3	chr19:1609289-1652604	-	protein_coding	16.3497
ENSG00000071575.11_2	TRIB2	chr2:12857015-12882860	+	protein_coding	2.09019
ENSG00000071626.16_3	DAZAP1	chr19:1407568-1435686	+	protein_coding	42.1388
ENSG00000071655.17_3	MBD3	chr19:1573595-1592800	-	protein_coding	9.14474
ENSG00000071794.15_2	HLTF	chr3:148747914-148804341	-	protein_coding	9.45773
ENSG00000071859.14_2	FAM50A	chrX:153672473-153679002	+	protein_coding	112.447
ENSG00000071889.16_3	FAM3A	chrX:153734490-153744566	-	protein_coding	8.5023
ENSG00000071894.16_3	CPSF1	chr8:145618444-145634733	-	protein_coding	33.2487
ENSG00000071967.11_2	CYBRD1	chr2:172378757-172414643	+	protein_coding	0.677523
ENSG00000071994.10_3	PDCD2	chr6:170884383-170893780	-	protein_coding	9.90581
ENSG00000072041.16_3	SLC6A15	chr12:85253267-85307394	-	protein_coding	4.43405
ENSG00000072042.12_3	RDH11	chr14:68143518-68162531	-	protein_coding	10.072
ENSG00000072062.13_2	PRKACA	chr19:14202500-14228896	-	protein_coding	23.6771
ENSG00000072071.16_2	ADGRL1	chr19:14258555-14316999	-	protein_coding	16.9156
ENSG00000072110.13_4	ACTN1	chr14:69340860-69446157	-	protein_coding	21.8553
ENSG00000072121.15_3	ZFYVE26	chr14:68194091-68283307	-	protein_coding	1.06716
ENSG00000072133.10_2	RPS6KA6	chrX:83313354-83442915	-	protein_coding	0.380141
ENSG00000072134.15_3	EPN2	chr17:19118928-19240028	+	protein_coding	3.32802
ENSG00000072135.12_3	PTPN18	chr2:131113580-131132982	+	protein_coding	12.4596
ENSG00000072163.19_3	LIMS2	chr2:128395956-128439360	-	protein_coding	0.620078
ENSG00000072195.14_1	SPEG	chr2:220299568-220363009	+	protein_coding	0.879354
ENSG00000072210.18_3	ALDH3A2	chr17:19551449-19580911	+	protein_coding	4.81045
ENSG00000072274.12_2	TFRC	chr3:195754054-195809060	-	protein_coding	8.28653
ENSG00000072310.16_3	SREBF1	chr17:17713713-17740316	-	protein_coding	4.30872
ENSG00000072364.12_2	AFF4	chr5:132211071-132299326	-	protein_coding	1.44141
ENSG00000072401.14_2	UBE2D1	chr10:60094735-60130513	+	protein_coding	3.91266
ENSG00000072415.8_3	MPP5	chr14:67707826-67802536	+	protein_coding	1.46925
ENSG00000072422.16_2	RHOBTB1	chr10:62629196-62761198	-	protein_coding	1.80625
ENSG00000072501.17_2	SMC1A	chrX:53401070-53449677	-	protein_coding	37.5742
ENSG00000072506.12_3	HSD17B10	chrX:53458206-53461320	-	protein_coding	260.019
ENSG00000072518.20_2	MARK2	chr11:63606400-63678491	+	protein_coding	12.0026
ENSG00000072571.19_3	HMMR	chr5:162887209-162918951	+	protein_coding	5.2799
ENSG00000072609.17_3	CHFR	chr12:133398773-133532890	-	protein_coding	1.36299
ENSG00000072682.18_3	P4HA2	chr5:131527531-131631008	-	protein_coding	7.31145
ENSG00000072736.18_3	NFATC3	chr16:68118654-68263162	+	protein_coding	2.3854
ENSG00000072756.16_2	TRNT1	chr3:3168600-3192563	+	protein_coding	1.0746
ENSG00000072778.19_2	ACADVL	chr17:7120444-7128592	+	protein_coding	15.9123
ENSG00000072786.12_2	STK10	chr5:171469077-171615390	-	protein_coding	4.38677
ENSG00000072803.17_2	FBXW11	chr5:171288553-171433877	-	protein_coding	4.94423
ENSG00000072840.12_2	EVC	chr4:5712924-5816032	+	protein_coding	1.75053
ENSG00000072849.10_3	DERL2	chr17:5374571-5390131	-	protein_coding	1.42946
ENSG00000072864.14_3	NDE1	chr16:15737124-15820210	+	protein_coding	3.77451
ENSG00000072952.18_3	MRVI1	chr11:10594638-10715535	-	protein_coding	0
ENSG00000072954.6_2	TMEM38A	chr19:16771938-16800840	+	protein_coding	4.09357
ENSG00000072958.8_2	AP1M1	chr19:16308389-16356718	+	protein_coding	6.64454
ENSG00000073008.14_3	PVR	chr19:45147098-45166850	+	protein_coding	10.5299
ENSG00000073050.11_3	XRCC1	chr19:44047192-44084625	-	protein_coding	31.3162
ENSG00000073060.15_2	SCARB1	chr12:125261402-125367214	-	protein_coding	13.3161
ENSG00000073111.13_3	MCM2	chr3:127317066-127341279	+	protein_coding	88.1232
ENSG00000073150.13_3	PANX2	chr22:50609160-50618723	+	protein_coding	18.0492
ENSG00000073169.13_2	SELENOO	chr22:50639408-50656045	+	protein_coding	22.2451
ENSG00000073331.17_3	ALPK1	chr4:113206665-113363776	+	protein_coding	0.508626
ENSG00000073350.13_2	LLGL2	chr17:73521161-73571289	+	protein_coding	2.9376
ENSG00000073417.14_4	PDE8A	chr15:85523671-85682376	+	protein_coding	2.51382
ENSG00000073536.17_2	NLE1	chr17:33455772-33469334	-	protein_coding	13.115
ENSG00000073578.16_3	SDHA	chr5:218356-256815	+	protein_coding	31.5389
ENSG00000073584.18_3	SMARCE1	chr17:38781214-38804760	-	protein_coding	12.2218
ENSG00000073614.12_3	KDM5A	chr12:389295-498620	-	protein_coding	1.74798
ENSG00000073670.13_3	ADAM11	chr17:42836399-42859214	+	protein_coding	8.63185
ENSG00000073711.10_3	PPP2R3A	chr3:135684515-135866733	+	protein_coding	0.635095
ENSG00000073712.14_3	FERMT2	chr14:53323986-53419153	-	protein_coding	2.19533
ENSG00000073792.15_2	IGF2BP2	chr3:185361527-185542844	-	protein_coding	25.7602
ENSG00000073803.13_2	MAP3K13	chr3:185000729-185206885	+	protein_coding	1.20509
ENSG00000073849.14_3	ST6GAL1	chr3:186648274-186796341	+	protein_coding	2.5256
ENSG00000073861.2_2	TBX21	chr17:45810610-45823485	+	protein_coding	0.697712
ENSG00000073921.17_3	PICALM	chr11:85668727-85780924	-	protein_coding	8.53703
ENSG00000073969.18_3	NSF	chr17:44668035-44834830	+	protein_coding	9.73987
ENSG00000074047.21_3	GLI2	chr2:121493199-121750229	+	protein_coding	2.94052
ENSG00000074054.17_3	CLASP1	chr2:122095352-122407163	-	protein_coding	2.27603
ENSG00000074071.14_3	MRPS34	chr16:1821891-1823156	-	protein_coding	356.557
ENSG00000074181.8_2	NOTCH3	chr19:15269849-15311792	-	protein_coding	12.8635
ENSG00000074201.8_2	CLNS1A	chr11:77225981-77348850	-	protein_coding	33.2985
ENSG00000074211.13_2	PPP2R2C	chr4:6322305-6565327	-	protein_coding	2.682
ENSG00000074219.13_3	TEAD2	chr19:49843852-49865714	-	protein_coding	12.9487
ENSG00000074266.19_3	EED	chr11:85955586-85989855	+	protein_coding	2.75154
ENSG00000074317.10_3	SNCB	chr5:176047085-176057557	-	protein_coding	44.4532
ENSG00000074319.12_3	TSG101	chr11:18489883-18548779	-	protein_coding	12.1315
ENSG00000074356.16_2	NCBP3	chr17:3705459-3749545	-	protein_coding	2.62508
ENSG00000074370.17_2	ATP2A3	chr17:3827164-3867758	-	protein_coding	3.76661
ENSG00000074410.13_2	CA12	chr15:63613577-63674360	-	protein_coding	2.88186
ENSG00000074416.13_4	MGLL	chr3:127407905-127542093	-	protein_coding	1.72828
ENSG00000074527.11_2	NTN4	chr12:96051583-96184930	-	protein_coding	0.638009
ENSG00000074582.12_2	BCS1L	chr2:219523487-219528166	+	protein_coding	12.0934
ENSG00000074590.13_3	NUAK1	chr12:106457118-106533811	-	protein_coding	1.46549
ENSG00000074603.18_3	DPP8	chr15:65734801-65810042	-	protein_coding	0.516087
ENSG00000074621.13_4	SLC24A1	chr15:65903704-65953333	+	protein_coding	0.807186
ENSG00000074657.13_3	ZNF532	chr18:56529832-56653712	+	protein_coding	0.929051
ENSG00000074695.5_2	LMAN1	chr18:56995055-57027194	-	protein_coding	8.70303
ENSG00000074696.12_2	HACD3	chr15:65822756-65870690	+	protein_coding	29.2208
ENSG00000074755.14_3	ZZEF1	chr17:3907739-4046314	-	protein_coding	2.04505
ENSG00000074800.13_3	ENO1	chr1:8921061-8939308	-	protein_coding	705.468
ENSG00000074842.7_3	MYDGF	chr19:4641386-4670382	-	protein_coding	77.4834
ENSG00000074855.10_3	ANO8	chr19:17434032-17445638	-	protein_coding	1.99304
ENSG00000074935.13_2	TUBE1	chr6:112391980-112408732	-	protein_coding	2.00587
ENSG00000074964.16_2	ARHGEF10L	chr1:17866330-18024369	+	protein_coding	1.34371
ENSG00000075043.18_3	KCNQ2	chr20:62031563-62104030	-	protein_coding	4.79546
ENSG00000075089.9_3	ACTR6	chr12:100592900-100635643	+	protein_coding	4.59617
ENSG00000075131.9_4	TIPIN	chr15:66628544-66679084	-	protein_coding	13.4494
ENSG00000075142.13_2	SRI	chr7:87834433-87856308	-	protein_coding	13.656
ENSG00000075151.20_3	EIF4G3	chr1:21132785-21503381	-	protein_coding	4.87477
ENSG00000075188.8_3	NUP37	chr12:102466881-102513902	-	protein_coding	10.6023
ENSG00000075218.18_2	GTSE1	chr22:46692638-46726707	+	protein_coding	15.1981
ENSG00000075234.16_3	TTC38	chr22:46663858-46689905	+	protein_coding	17.8264
ENSG00000075239.13_2	ACAT1	chr11:107992243-108018503	+	protein_coding	23.1625
ENSG00000075240.16_3	GRAMD4	chr22:46971909-47075687	+	protein_coding	8.27521
ENSG00000075275.16_3	CELSR1	chr22:46756731-46933067	-	protein_coding	2.51447
ENSG00000075290.7_2	WNT8B	chr10:102222798-102243501	+	protein_coding	0.76219
ENSG00000075292.18_3	ZNF638	chr2:71503691-71662199	+	protein_coding	3.41412
ENSG00000075303.12_2	SLC25A40	chr7:87462883-87505672	-	protein_coding	0.807593
ENSG00000075336.11_3	TIMM21	chr18:71815746-71827765	+	protein_coding	2.06924
ENSG00000075340.22_2	ADD2	chr2:70834750-70995357	-	protein_coding	5.51256
ENSG00000075399.13_4	VPS9D1	chr16:89773542-89787394	-	protein_coding	0.588303
ENSG00000075407.18_3	ZNF37A	chr10:38383262-38439221	+	protein_coding	0.97175
ENSG00000075413.17_4	MARK3	chr14:103851729-103970168	+	protein_coding	6.17738
ENSG00000075415.12_3	SLC25A3	chr12:98987369-99000157	+	protein_coding	33.8218
ENSG00000075420.12_2	FNDC3B	chr3:171757418-172119455	+	protein_coding	0.860073
ENSG00000075426.11_3	FOSL2	chr2:28615315-28640179	+	protein_coding	1.29678
ENSG00000075461.5_2	CACNG4	chr17:64961026-65029514	+	protein_coding	1.13338
ENSG00000075539.14_4	FRYL	chr4:48499378-48782339	-	protein_coding	0.454651
ENSG00000075568.16_2	TMEM131	chr2:98372796-98612354	-	protein_coding	2.66648
ENSG00000075618.17_2	FSCN1	chr7:5632454-5646286	+	protein_coding	101.462
ENSG00000075624.13_3	ACTB	chr7:5566782-5603415	-	protein_coding	698.721
ENSG00000075643.5_3	MOCOS	chr18:33767482-33852120	+	protein_coding	4.25471
ENSG00000075651.15_2	PLD1	chr3:171318195-171528740	-	protein_coding	0.723465
ENSG00000075673.11_2	ATP12A	chr13:25254549-25286631	+	protein_coding	0.617072
ENSG00000075702.16_3	WDR62	chr19:36545783-36596008	+	protein_coding	6.87728
ENSG00000075711.20_3	DLG1	chr3:196769431-197026171	-	protein_coding	2.11009
ENSG00000075785.12_2	RAB7A	chr3:128444965-128533639	+	protein_coding	114.488
ENSG00000075790.10_4	BCAP29	chr7:107220422-107269615	+	protein_coding	1.02917
ENSG00000075856.11_3	SART3	chr12:108916357-108955176	-	protein_coding	9.83876
ENSG00000075891.21_2	PAX2	chr10:102495360-102589698	+	protein_coding	2.50191
ENSG00000075914.12_3	EXOSC7	chr3:45016733-45077558	+	protein_coding	11.8204
ENSG00000075945.12_2	KIFAP3	chr1:169890467-170054349	-	protein_coding	6.66776
ENSG00000075975.15_2	MKRN2	chr3:12598513-12625212	+	protein_coding	10.5091
ENSG00000076003.4_2	MCM6	chr2:136597196-136633996	-	protein_coding	46.9003
ENSG00000076043.9_3	REXO2	chr11:114310108-114321001	+	protein_coding	7.79243
ENSG00000076053.10_3	RBM7	chr11:114270752-114284925	+	protein_coding	1.27693
ENSG00000076067.12_2	RBMS2	chr12:56915713-56989980	+	protein_coding	3.81055
ENSG00000076108.11_2	BAZ2A	chr12:56989380-57030600	-	protein_coding	12.1132
ENSG00000076201.14_2	PTPN23	chr3:47422501-47454931	+	protein_coding	9.8454
ENSG00000076248.10_2	UNG	chr12:109535379-109548797	+	protein_coding	12.8577
ENSG00000076258.9_2	FMO4	chr1:171283347-171311223	+	protein_coding	1.04385
ENSG00000076321.10_3	KLHL20	chr1:173684080-173755840	+	protein_coding	2.91422
ENSG00000076351.12_3	SLC46A1	chr17:26721775-26734215	-	protein_coding	2.40625
ENSG00000076356.6_2	PLXNA2	chr1:208195587-208417665	-	protein_coding	1.0951
ENSG00000076382.16_3	SPAG5	chr17:26904583-26926297	-	protein_coding	13.7952
ENSG00000076513.16_3	ANKRD13A	chr12:110436991-110477568	+	protein_coding	3.48663
ENSG00000076554.15_4	TPD52	chr8:80946980-81143467	-	protein_coding	4.16243
ENSG00000076555.15_3	ACACB	chr12:109554400-109706031	+	protein_coding	0.83117
ENSG00000076604.14_3	TRAF4	chr17:27071002-27077976	+	protein_coding	7.40154
ENSG00000076641.4_2	PAG1	chr8:81880045-82024303	-	protein_coding	0.636131
ENSG00000076650.6_2	GPATCH1	chr19:33571786-33621448	+	protein_coding	3.97425
ENSG00000076662.9_3	ICAM3	chr19:10444452-10450499	-	protein_coding	5.63615
ENSG00000076685.18_3	NT5C2	chr10:104847774-104953063	-	protein_coding	6.27936
ENSG00000076706.16_3	MCAM	chr11:119179239-119192231	-	protein_coding	9.80208
ENSG00000076716.8_2	GPC4	chrX:132434131-132549518	-	protein_coding	15.6522
ENSG00000076770.14_3	MBNL3	chrX:131503345-131623996	-	protein_coding	0.320184
ENSG00000076826.9_2	CAMSAP3	chr19:7660788-7683190	+	protein_coding	11.8812
ENSG00000076864.19_3	RAP1GAP	chr1:21922708-21995856	-	protein_coding	8.65358
ENSG00000076924.11_2	XAB2	chr19:7684411-7694451	-	protein_coding	33.5484
ENSG00000076928.17_3	ARHGEF1	chr19:42387228-42434302	+	protein_coding	8.65291
ENSG00000076944.15_3	STXBP2	chr19:7701767-7712759	+	protein_coding	10.8942
ENSG00000076984.17_2	MAP2K7	chr19:7968728-7979363	+	protein_coding	5.24994
ENSG00000077009.13_2	NMRK2	chr19:3933101-3942414	+	protein_coding	1.46768
ENSG00000077044.10_3	DGKD	chr2:234263153-234380750	+	protein_coding	2.38662
ENSG00000077063.10_3	CTTNBP2	chr7:117350705-117514193	-	protein_coding	0.588749
ENSG00000077092.18_3	RARB	chr3:25215823-25639423	+	protein_coding	0.894722
ENSG00000077097.15_3	TOP2B	chr3:25639396-25706398	-	protein_coding	12.9088
ENSG00000077147.14_2	TM9SF3	chr10:98277866-98347209	-	protein_coding	6.70034
ENSG00000077150.18_3	NFKB2	chr10:104153867-104162286	+	protein_coding	44.5563
ENSG00000077152.9_2	UBE2T	chr1:202300785-202311108	-	protein_coding	90.5525
ENSG00000077232.17_3	DNAJC10	chr2:183580768-183659191	+	protein_coding	1.08707
ENSG00000077235.17_3	GTF3C1	chr16:27470876-27561234	-	protein_coding	13.5852
ENSG00000077238.13_3	IL4R	chr16:27324989-27376099	+	protein_coding	0.906209
ENSG00000077254.14_4	USP33	chr1:78161672-78225537	-	protein_coding	5.62423
ENSG00000077274.8_2	CAPN6	chrX:110488331-110513751	-	protein_coding	0.855296
ENSG00000077312.8_3	SNRPA	chr19:41256542-41271294	+	protein_coding	82.4772
ENSG00000077348.8_2	EXOSC5	chr19:41892279-41903384	-	protein_coding	36.9239
ENSG00000077380.15_3	DYNC1I2	chr2:172543919-172604930	+	protein_coding	15.1479
ENSG00000077454.15_3	LRCH4	chr7:100171634-100183776	-	protein_coding	3.477
ENSG00000077458.12_2	FAM76B	chr11:95502106-95523573	-	protein_coding	0.784412
ENSG00000077463.14_3	SIRT6	chr19:4174106-4182601	-	protein_coding	11.4578
ENSG00000077514.8_3	POLD3	chr11:74204896-74380162	+	protein_coding	6.40716
ENSG00000077522.12_2	ACTN2	chr1:236849754-236927931	+	protein_coding	0.665679
ENSG00000077549.17_3	CAPZB	chr1:19665270-19812033	-	protein_coding	77.1932
ENSG00000077585.13_3	GPR137B	chr1:236305805-236385165	+	protein_coding	3.65047
ENSG00000077684.15_3	JADE1	chr4:129730778-129796379	+	protein_coding	2.91214
ENSG00000077713.18_3	SLC25A43	chrX:118533023-118588441	+	protein_coding	2.87372
ENSG00000077721.15_2	UBE2A	chrX:118708430-118725046	+	protein_coding	7.42902
ENSG00000077782.19_3	FGFR1	chr8:38268656-38326352	-	protein_coding	5.41232
ENSG00000077942.18_3	FBLN1	chr22:45898118-45997015	+	protein_coding	42.6881
ENSG00000077943.7_2	ITGA8	chr10:15555948-15762124	-	protein_coding	0.532913
ENSG00000078043.15_3	PIAS2	chr18:44383187-44500123	-	protein_coding	0.550944
ENSG00000078053.16_3	AMPH	chr7:38423305-38671167	-	protein_coding	3.17797
ENSG00000078061.12_2	ARAF	chrX:47420499-47431319	+	protein_coding	21.5087
ENSG00000078070.12_3	MCCC1	chr3:182733006-182833863	-	protein_coding	6.29932
ENSG00000078081.7_3	LAMP3	chr3:182840001-182881627	-	protein_coding	1.93949
ENSG00000078124.11_3	ACER3	chr11:76571911-76737841	+	protein_coding	0.671316
ENSG00000078140.13_3	UBE2K	chr4:39699664-39784412	+	protein_coding	8.84198
ENSG00000078142.12_3	PIK3C3	chr18:39535171-39667794	+	protein_coding	0.924423
ENSG00000078177.13_3	N4BP2	chr4:40058446-40159872	+	protein_coding	0.249658
ENSG00000078237.6_2	TIGAR	chr12:4416929-4463759	+	protein_coding	3.57496
ENSG00000078246.16_3	TULP3	chr12:2986389-3050306	+	protein_coding	13.4829
ENSG00000078269.14_3	SYNJ2	chr6:158402919-158520208	+	protein_coding	2.06289
ENSG00000078304.19_3	PPP2R5C	chr14:102228135-102394326	+	protein_coding	4.82368
ENSG00000078369.17_2	GNB1	chr1:1716724-1822556	-	protein_coding	43.302
ENSG00000078399.17_3	HOXA9	chr7:27202054-27214799	-	protein_coding	10.4639
ENSG00000078403.16_3	MLLT10	chr10:21813604-22032559	+	protein_coding	2.87953
ENSG00000078487.17_3	ZCWPW1	chr7:99998449-100026615	-	protein_coding	0.563737
ENSG00000078549.14_3	ADCYAP1R1	chr7:31092076-31151093	+	protein_coding	0.749668
ENSG00000078618.21_3	NRDC	chr1:52254863-52344609	-	protein_coding	12.6865
ENSG00000078668.13_3	VDAC3	chr8:42249142-42263415	+	protein_coding	33.5158
ENSG00000078674.17_2	PCM1	chr8:17780349-17887453	+	protein_coding	1.35271
ENSG00000078687.17_3	TNRC6C	chr17:75955322-76104916	+	protein_coding	0.828678
ENSG00000078699.21_2	CBFA2T2	chr20:32077881-32237842	+	protein_coding	1.08199
ENSG00000078747.14_3	ITCH	chr20:32951041-33099198	+	protein_coding	2.51882
ENSG00000078804.12_3	TP53INP2	chr20:33292094-33301243	+	protein_coding	4.24342
ENSG00000078808.16_2	SDF4	chr1:1152288-1167411	-	protein_coding	30.9076
ENSG00000078900.14_3	TP73	chr1:3569084-3652765	+	protein_coding	5.31009
ENSG00000078902.15_2	TOLLIP	chr11:1295601-1330884	-	protein_coding	7.10562
ENSG00000078967.12_3	UBE2D4	chr7:43966037-43995735	+	protein_coding	4.27023
ENSG00000079134.11_3	THOC1	chr18:214520-268050	-	protein_coding	1.81428
ENSG00000079150.17_2	FKBP7	chr2:179328391-179343327	-	protein_coding	3.85965
ENSG00000079156.16_2	OSBPL6	chr2:179059208-179267618	+	protein_coding	1.42417
ENSG00000079215.13_3	SLC1A3	chr5:36606457-36688436	+	protein_coding	2.55272
ENSG00000079246.15_3	XRCC5	chr2:216972187-217071026	+	protein_coding	75.6486
ENSG00000079277.19_4	MKNK1	chr1:47023080-47082515	-	protein_coding	2.96141
ENSG00000079308.16_3	TNS1	chr2:218664512-218867718	-	protein_coding	0.424626
ENSG00000079313.13_3	REXO1	chr19:1815245-1848462	-	protein_coding	12.3556
ENSG00000079332.14_3	SAR1A	chr10:71907045-71930279	-	protein_coding	5.25252
ENSG00000079335.18_3	CDC14A	chr1:100810581-100985833	+	protein_coding	0.464633
ENSG00000079387.13_3	SENP1	chr12:48436681-48500091	-	protein_coding	1.41432
ENSG00000079432.7_3	CIC	chr19:42772689-42799949	+	protein_coding	4.75295
ENSG00000079459.12_3	FDFT1	chr8:11653082-11696818	+	protein_coding	23.9156
ENSG00000079462.7_3	PAFAH1B3	chr19:42801185-42807698	-	protein_coding	42.6868
ENSG00000079482.12_3	OPHN1	chrX:67262186-67653755	-	protein_coding	0.690001
ENSG00000079616.12_2	KIF22	chr16:29802040-29816706	+	protein_coding	52.9023
ENSG00000079691.17_3	CARMIL1	chr6:25279306-25620758	+	protein_coding	3.40669
ENSG00000079739.15_2	PGM1	chr1:64058947-64125916	+	protein_coding	30.4738
ENSG00000079785.14_3	DDX1	chr2:15731302-15771235	+	protein_coding	42.867
ENSG00000079805.16_4	DNM2	chr19:10828755-10944164	+	protein_coding	14.1206
ENSG00000079819.18_3	EPB41L2	chr6:131160487-131384462	-	protein_coding	14.6939
ENSG00000079931.14_2	MOXD1	chr6:132617194-132722684	-	protein_coding	3.52101
ENSG00000079950.13_2	STX7	chr6:132767006-132834337	-	protein_coding	0.723763
ENSG00000079974.17_3	RABL2B	chr22:51205929-51222091	-	protein_coding	2.10817
ENSG00000079999.13_3	KEAP1	chr19:10596796-10614417	-	protein_coding	16.9782
ENSG00000080031.9_3	PTPRH	chr19:55692616-55720874	-	protein_coding	0.664136
ENSG00000080189.14_2	SLC35C2	chr20:44974619-44993097	-	protein_coding	3.46934
ENSG00000080200.9_2	CRYBG3	chr3:97540884-97663807	+	protein_coding	0.813202
ENSG00000080224.17_3	EPHA6	chr3:96533425-97471304	+	protein_coding	1.19259
ENSG00000080345.17_3	RIF1	chr2:152266397-152364527	+	protein_coding	1.53542
ENSG00000080371.5_2	RAB21	chr12:72148654-72194065	+	protein_coding	1.7023
ENSG00000080503.22_3	SMARCA2	chr9:1980290-2193624	+	protein_coding	1.91342
ENSG00000080546.13_2	SESN1	chr6:109307640-109416022	-	protein_coding	2.8188
ENSG00000080561.13_3	MID2	chrX:107068985-107170423	+	protein_coding	5.4557
ENSG00000080603.16_3	SRCAP	chr16:30709530-30752730	+	protein_coding	13.3041
ENSG00000080608.9_2	PUM3	chr9:2720469-2844241	-	protein_coding	14.524
ENSG00000080644.15_4	CHRNA3	chr15:78885394-78913637	-	protein_coding	1.06178
ENSG00000080802.18_2	CNOT4	chr7:135046547-135194875	-	protein_coding	5.17933
ENSG00000080815.18_3	PSEN1	chr14:73603126-73690399	+	protein_coding	3.25187
ENSG00000080819.6_3	CPOX	chr3:98239976-98312567	-	protein_coding	15.7295
ENSG00000080822.16_3	CLDND1	chr3:98216756-98241910	-	protein_coding	2.18786
ENSG00000080823.22_2	MOK	chr14:102690837-102771537	-	protein_coding	1.07641
ENSG00000080824.18_2	HSP90AA1	chr14:102547075-102606036	-	protein_coding	135.34
ENSG00000080839.11_3	RBL1	chr20:35624752-35724398	-	protein_coding	2.31598
ENSG00000080845.17_2	DLGAP4	chr20:34894258-35157040	+	protein_coding	8.36749
ENSG00000080986.12_2	NDC80	chr18:2571510-2616634	+	protein_coding	5.39686
ENSG00000081014.10_3	AP4E1	chr15:51200869-51298097	+	protein_coding	0.6043
ENSG00000081019.13_2	RSBN1	chr1:114304454-114355098	-	protein_coding	1.39613
ENSG00000081026.18_3	MAGI3	chr1:113933371-114228545	+	protein_coding	1.17486
ENSG00000081041.8_2	CXCL2	chr4:74962752-74965010	-	protein_coding	0.399478
ENSG00000081059.19_3	TCF7	chr5:133450402-133487556	+	protein_coding	1.48334
ENSG00000081087.14_3	OSTM1	chr6:108362613-108487058	-	protein_coding	1.28074
ENSG00000081154.11_2	PCNP	chr3:101292939-101313281	+	protein_coding	11.4672
ENSG00000081177.18_2	EXD2	chr14:69658228-69710737	+	protein_coding	3.68765
ENSG00000081181.7_2	ARG2	chr14:68086515-68118437	+	protein_coding	35.8865
ENSG00000081189.15_3	MEF2C	chr5:88012934-88200074	-	protein_coding	0.482086
ENSG00000081307.12_3	UBA5	chr3:132373290-132396941	+	protein_coding	3.87709
ENSG00000081320.10_3	STK17B	chr2:196998290-197041227	-	protein_coding	1.38168
ENSG00000081377.16_2	CDC14B	chr9:99252523-99382112	-	protein_coding	1.32172
ENSG00000081386.12_2	ZNF510	chr9:99518147-99540411	-	protein_coding	0.259066
ENSG00000081479.12_2	LRP2	chr2:169983619-170219195	-	protein_coding	1.0159
ENSG00000081692.12_2	JMJD4	chr1:227918126-227923112	-	protein_coding	16.4152
ENSG00000081721.11_2	DUSP12	chr1:161719548-161727028	+	protein_coding	7.03003
ENSG00000081760.16_3	AACS	chr12:125549925-125627879	+	protein_coding	1.82186
ENSG00000081791.8_3	KIAA0141	chr5:141303373-141321612	+	protein_coding	4.38861
ENSG00000081803.15_4	CADPS2	chr7:121958479-122526813	-	protein_coding	1.10032
ENSG00000081870.11_2	HSPB11	chr1:54382247-54411602	-	protein_coding	6.57778
ENSG00000081913.13_3	PHLPP1	chr18:60382683-60647666	+	protein_coding	3.48069
ENSG00000081985.10_2	IL12RB2	chr1:67773047-67862583	+	protein_coding	1.72536
ENSG00000082014.16_2	SMARCD3	chr7:150935850-150974982	-	protein_coding	10.4497
ENSG00000082068.8_2	WDR70	chr5:37379314-37753537	+	protein_coding	6.0321
ENSG00000082146.12_2	STRADB	chr2:202252581-202345569	+	protein_coding	11.4363
ENSG00000082153.17_3	BZW1	chr2:201675317-201692061	+	protein_coding	3.40227
ENSG00000082212.12_2	ME2	chr18:48405104-48480627	+	protein_coding	2.663
ENSG00000082213.17_4	C5orf22	chr5:31532373-31555165	+	protein_coding	3.46944
ENSG00000082258.12_2	CCNT2	chr2:135675805-135716912	+	protein_coding	0.662498
ENSG00000082269.16_3	FAM135A	chr6:71122644-71270877	+	protein_coding	0.458913
ENSG00000082397.17_4	EPB41L3	chr18:5392380-5630699	-	protein_coding	5.81669
ENSG00000082458.11_2	DLG3	chrX:69664711-69725340	+	protein_coding	6.63722
ENSG00000082497.11_2	SERTAD4	chr1:210406144-210419976	+	protein_coding	1.16331
ENSG00000082512.14_2	TRAF5	chr1:211499957-211548288	+	protein_coding	1.00406
ENSG00000082515.17_3	MRPL22	chr5:154320630-154348971	+	protein_coding	21.3575
ENSG00000082516.8_2	GEMIN5	chr5:154266976-154317769	-	protein_coding	14.3142
ENSG00000082641.15_3	NFE2L1	chr17:46125691-46138849	+	protein_coding	17.0398
ENSG00000082684.14_3	SEMA5B	chr3:122628040-122747452	-	protein_coding	0.587001
ENSG00000082701.14_4	GSK3B	chr3:119540170-119813264	-	protein_coding	4.80462
ENSG00000082781.11_3	ITGB5	chr3:124480795-124620265	-	protein_coding	7.62283
ENSG00000082805.19_3	ERC1	chr12:1099675-1605099	+	protein_coding	0.789786
ENSG00000082898.16_2	XPO1	chr2:61704984-61765761	-	protein_coding	9.55825
ENSG00000082996.19_4	RNF13	chr3:149530495-149679926	+	protein_coding	3.58483
ENSG00000083093.9_2	PALB2	chr16:23614481-23652631	-	protein_coding	2.01858
ENSG00000083097.14_2	DOPEY1	chr6:83777385-83881069	+	protein_coding	0.493757
ENSG00000083099.10_2	LYRM2	chr6:90277863-90348472	-	protein_coding	2.24961
ENSG00000083123.14_2	BCKDHB	chr6:80816364-81055987	+	protein_coding	2.5657
ENSG00000083168.9_3	KAT6A	chr8:41786997-41909508	-	protein_coding	1.13898
ENSG00000083223.17_2	ZCCHC6	chr9:88902648-88969369	-	protein_coding	1.57706
ENSG00000083312.17_2	TNPO1	chr5:72112139-72212560	+	protein_coding	4.72982
ENSG00000083444.16_2	PLOD1	chr1:11994262-12035595	+	protein_coding	38.7945
ENSG00000083457.11_2	ITGAE	chr17:3617922-3704537	-	protein_coding	1.29701
ENSG00000083520.14_2	DIS3	chr13:73326307-73356234	-	protein_coding	6.80923
ENSG00000083535.15_3	PIBF1	chr13:73356197-73590599	+	protein_coding	4.44208
ENSG00000083544.13_3	TDRD3	chr13:60970591-61148012	+	protein_coding	1.11578
ENSG00000083635.7_3	NUFIP1	chr13:45513384-45563618	-	protein_coding	8.4924
ENSG00000083642.18_2	PDS5B	chr13:33160564-33352157	+	protein_coding	1.11057
ENSG00000083720.12_2	OXCT1	chr5:41730167-41870621	-	protein_coding	4.25696
ENSG00000083750.12_3	RRAGB	chrX:55744172-55785207	+	protein_coding	1.31027
ENSG00000083799.17_3	CYLD	chr16:50775961-50835846	+	protein_coding	0.599477
ENSG00000083807.9_4	SLC27A5	chr19:58990879-59023780	-	protein_coding	1.80554
ENSG00000083812.11_3	ZNF324	chr19:58978412-58986803	+	protein_coding	0.705955
ENSG00000083817.8_2	ZNF416	chr19:58082934-58090295	-	protein_coding	1.30598
ENSG00000083828.15_3	ZNF586	chr19:58281023-58331307	+	protein_coding	0.946174
ENSG00000083838.15_3	ZNF446	chr19:58985384-58992597	+	protein_coding	1.95776
ENSG00000083844.10_4	ZNF264	chr19:57702868-57734214	+	protein_coding	0.496673
ENSG00000083845.8_2	RPS5	chr19:58897767-58906173	+	protein_coding	128.246
ENSG00000083857.13_3	FAT1	chr4:187508937-187647876	-	protein_coding	1.73442
ENSG00000083896.12_3	YTHDC1	chr4:69176105-69215807	-	protein_coding	7.71869
ENSG00000083937.8_2	CHMP2B	chr3:87276421-87304698	+	protein_coding	5.31182
ENSG00000084070.11_3	SMAP2	chr1:40810522-40888998	+	protein_coding	22.6642
ENSG00000084072.16_3	PPIE	chr1:40157854-40229586	+	protein_coding	9.81757
ENSG00000084073.8_2	ZMPSTE24	chr1:40723779-40759856	+	protein_coding	6.47376
ENSG00000084090.13_3	STARD7	chr2:96850597-96874563	-	protein_coding	34.7694
ENSG00000084092.6_2	NOA1	chr4:57829536-57844989	-	protein_coding	24.8441
ENSG00000084093.16_2	REST	chr4:57774042-57832844	+	protein_coding	1.51382
ENSG00000084112.14_3	SSH1	chr12:109171968-109251366	-	protein_coding	0.870821
ENSG00000084207.15_2	GSTP1	chr11:67351066-67354131	+	protein_coding	245.548
ENSG00000084234.16_3	APLP2	chr11:129939732-130014706	+	protein_coding	60.2291
ENSG00000084444.13_2	FAM234B	chr12:13197218-13295455	+	protein_coding	6.82736
ENSG00000084463.7_2	WBP11	chr12:14937513-14956474	-	protein_coding	41.2466
ENSG00000084623.11_2	EIF3I	chr1:32687529-32697205	+	protein_coding	463.49
ENSG00000084628.9_2	NKAIN1	chr1:31652592-31712401	-	protein_coding	6.93823
ENSG00000084652.15_2	TXLNA	chr1:32645287-32663886	+	protein_coding	38.5533
ENSG00000084676.15_2	NCOA1	chr2:24714783-24993571	+	protein_coding	1.00103
ENSG00000084693.15_3	AGBL5	chr2:27265232-27293490	+	protein_coding	19.1823
ENSG00000084710.13_2	EFR3B	chr2:25264999-25382006	+	protein_coding	1.17966
ENSG00000084731.14_3	KIF3C	chr2:26149465-26205618	-	protein_coding	6.68758
ENSG00000084733.10_2	RAB10	chr2:26256976-26360323	+	protein_coding	17.5265
ENSG00000084754.10_3	HADHA	chr2:26413504-26467594	-	protein_coding	113.179
ENSG00000084764.10_3	MAPRE3	chr2:27193480-27250064	+	protein_coding	7.82904
ENSG00000084774.13_2	CAD	chr2:27440258-27466811	+	protein_coding	23.922
ENSG00000085063.14_3	CD59	chr11:33719807-33757991	-	protein_coding	6.99502
ENSG00000085117.11_3	CD82	chr11:44585977-44641913	+	protein_coding	1.95728
ENSG00000085185.15_3	BCORL1	chrX:129115083-129192058	+	protein_coding	10.0927
ENSG00000085224.21_4	ATRX	chrX:76760356-77041755	-	protein_coding	0.598665
ENSG00000085231.13_3	AK6	chr5:68646811-68665840	-	protein_coding	8.45968
ENSG00000085274.15_2	MYNN	chr3:169490619-169507504	+	protein_coding	1.34614
ENSG00000085276.17_4	MECOM	chr3:168801287-169381406	-	protein_coding	0.485077
ENSG00000085365.17_2	SCAMP1	chr5:77656407-77774894	+	protein_coding	2.12412
ENSG00000085377.13_3	PREP	chr6:105725440-105850959	-	protein_coding	26.3951
ENSG00000085382.11_3	HACE1	chr6:105175968-105307794	-	protein_coding	0.536695
ENSG00000085415.15_2	SEH1L	chr18:12947132-12987535	+	protein_coding	1.93436
ENSG00000085433.15_3	WDR47	chr1:109512836-109584735	-	protein_coding	1.44052
ENSG00000085449.14_3	WDFY1	chr2:224720433-224810104	-	protein_coding	3.41892
ENSG00000085465.12_2	OVGP1	chr1:111956936-111970399	-	protein_coding	0.941145
ENSG00000085491.15_2	SLC25A24	chr1:108676658-108743471	-	protein_coding	2.5433
ENSG00000085511.19_3	MAP3K4	chr6:161412759-161538417	+	protein_coding	2.11544
ENSG00000085552.16_2	IGSF9	chr1:159896829-159915394	-	protein_coding	0.67602
ENSG00000085563.14_2	ABCB1	chr7:87132949-87342639	-	protein_coding	1.64592
ENSG00000085644.13_2	ZNF213	chr16:3179778-3192806	+	protein_coding	1.31174
ENSG00000085662.13_2	AKR1B1	chr7:134127102-134144036	-	protein_coding	55.583
ENSG00000085719.12_3	CPNE3	chr8:87526656-87573726	+	protein_coding	6.51407
ENSG00000085721.12_2	RRN3	chr16:15153879-15188174	-	protein_coding	6.18464
ENSG00000085733.15_2	CTTN	chr11:70244510-70282690	+	protein_coding	14.2101
ENSG00000085741.12_2	WNT11	chr11:75897369-75921780	-	protein_coding	12.4933
ENSG00000085760.14_2	MTIF2	chr2:55463731-55496483	-	protein_coding	11.2864
ENSG00000085788.13_3	DDHD2	chr8:38082736-38133076	+	protein_coding	1.76829
ENSG00000085831.15_3	TTC39A	chr1:51752930-51810788	-	protein_coding	2.35683
ENSG00000085832.16_4	EPS15	chr1:51819935-51985000	-	protein_coding	3.22811
ENSG00000085840.12_2	ORC1	chr1:52838501-52870131	-	protein_coding	15.8603
ENSG00000085871.8_2	MGST2	chr4:140586922-140661899	+	protein_coding	9.50529
ENSG00000085872.14_3	CHERP	chr19:16628700-16653341	-	protein_coding	19.0677
ENSG00000085978.21_2	ATG16L1	chr2:234118697-234204320	+	protein_coding	3.9233
ENSG00000085982.13_2	USP40	chr2:234384166-234475428	-	protein_coding	1.18697
ENSG00000085998.13_2	POMGNT1	chr1:46654354-46685977	-	protein_coding	6.51164
ENSG00000085999.11_3	RAD54L	chr1:46713360-46744145	+	protein_coding	23.2777
ENSG00000086015.20_2	MAST2	chr1:46252659-46501796	+	protein_coding	8.18393
ENSG00000086061.15_2	DNAJA1	chr9:33025209-33039905	+	protein_coding	70.0293
ENSG00000086062.12_2	B4GALT1	chr9:33104080-33167354	-	protein_coding	13.8691
ENSG00000086065.13_2	CHMP5	chr9:33264877-33282067	+	protein_coding	25.4032
ENSG00000086102.18_2	NFX1	chr9:33290509-33371155	+	protein_coding	6.84301
ENSG00000086189.9_2	DIMT1	chr5:61683081-61699766	-	protein_coding	8.90763
ENSG00000086200.16_3	IPO11	chr5:61699799-61924409	+	protein_coding	3.63252
ENSG00000086232.12_3	EIF2AK1	chr7:6061875-6098861	-	protein_coding	32.8792
ENSG00000086289.11_3	EPDR1	chr7:37723446-37991543	+	protein_coding	1.13274
ENSG00000086300.15_2	SNX10	chr7:26331515-26413949	+	protein_coding	2.23382
ENSG00000086475.14_2	SEPHS1	chr10:13359424-13390298	-	protein_coding	21.1599
ENSG00000086504.15_2	MRPL28	chr16:417384-420527	-	protein_coding	113.743
ENSG00000086506.2_2	HBQ1	chr16:230452-231180	+	protein_coding	35.5838
ENSG00000086544.2_2	ITPKC	chr19:41223008-41246765	+	protein_coding	4.59077
ENSG00000086589.11_2	RBM22	chr5:150070356-150080669	-	protein_coding	16.8232
ENSG00000086598.10_2	TMED2	chr12:124069078-124083124	+	protein_coding	34.3479
ENSG00000086619.13_2	ERO1B	chr1:236378855-236445285	-	protein_coding	1.30633
ENSG00000086666.18_3	ZFAND6	chr15:80351910-80430735	+	protein_coding	3.46855
ENSG00000086712.12_3	TXLNG	chrX:16804550-16862642	+	protein_coding	8.341
ENSG00000086758.15_3	HUWE1	chrX:53559057-53713674	-	protein_coding	18.7243
ENSG00000086827.8_3	ZW10	chr11:113603909-113644533	-	protein_coding	11.4786
ENSG00000086848.14_3	ALG9	chr11:111652919-111742305	-	protein_coding	2.04027
ENSG00000087008.15_2	ACOX3	chr4:8368009-8442450	-	protein_coding	2.68809
ENSG00000087053.18_2	MTMR2	chr11:95566046-95658479	-	protein_coding	3.63059
ENSG00000087074.7_3	PPP1R15A	chr19:49375649-49379314	+	protein_coding	22.3674
ENSG00000087076.8_3	HSD17B14	chr19:49316274-49339935	-	protein_coding	12.5865
ENSG00000087077.13_3	TRIP6	chr7:100464760-100471076	+	protein_coding	28.335
ENSG00000087085.13_3	ACHE	chr7:100487615-100494594	-	protein_coding	1.76779
ENSG00000087086.14_3	FTL	chr19:49468558-49470135	+	protein_coding	864.486
ENSG00000087087.19_4	SRRT	chr7:100472733-100486285	+	protein_coding	59.0418
ENSG00000087088.19_3	BAX	chr19:49458072-49465055	+	protein_coding	26.6029
ENSG00000087095.12_2	NLK	chr17:26368763-26523407	+	protein_coding	1.68071
ENSG00000087111.20_3	PIGS	chr17:26880401-26898890	-	protein_coding	16.7837
ENSG00000087116.14_3	ADAMTS2	chr5:178537852-178772431	-	protein_coding	3.1974
ENSG00000087152.15_2	ATXN7L3	chr17:42269173-42277481	-	protein_coding	9.46671
ENSG00000087157.18_2	PGS1	chr17:76374721-76421195	+	protein_coding	2.49449
ENSG00000087191.12_3	PSMC5	chr17:61904512-61909386	+	protein_coding	35.2608
ENSG00000087206.16_3	UIMC1	chr5:176332006-176449634	-	protein_coding	7.45368
ENSG00000087245.12_3	MMP2	chr16:55423612-55540603	+	protein_coding	13.7682
ENSG00000087253.12_3	LPCAT2	chr16:55542910-55620582	+	protein_coding	1.17847
ENSG00000087258.14_3	GNAO1	chr16:56225259-56391369	+	protein_coding	1.68568
ENSG00000087263.16_2	OGFOD1	chr16:56485402-56513012	+	protein_coding	10.0749
ENSG00000087266.15_3	SH3BP2	chr4:2794750-2842825	+	protein_coding	1.57611
ENSG00000087269.15_2	NOP14	chr4:2939660-2965112	-	protein_coding	47.6506
ENSG00000087274.16_3	ADD1	chr4:2845584-2931803	+	protein_coding	8.59001
ENSG00000087299.11_2	L2HGDH	chr14:50704281-50779266	-	protein_coding	2.98402
ENSG00000087301.8_3	TXNDC16	chr14:52897308-53019240	-	protein_coding	1.46981
ENSG00000087302.8_2	C14orf166	chr14:52456193-52477409	+	protein_coding	21.1709
ENSG00000087303.17_3	NID2	chr14:52471521-52535946	-	protein_coding	10.2625
ENSG00000087338.4_2	GMCL1	chr2:70056774-70108528	+	protein_coding	2.96705
ENSG00000087365.15_3	SF3B2	chr11:65818200-65836779	+	protein_coding	61.4384
ENSG00000087448.9_2	KLHL42	chr12:27932953-27955973	+	protein_coding	1.64173
ENSG00000087460.24_3	GNAS	chr20:57414773-57486247	+	protein_coding	79.1964
ENSG00000087470.17_2	DNM1L	chr12:32832134-32898584	+	protein_coding	5.25295
ENSG00000087495.16_2	PHACTR3	chr20:58152564-58422766	+	protein_coding	2.37724
ENSG00000087502.17_3	ERGIC2	chr12:29490285-29534122	-	protein_coding	3.23704
ENSG00000087510.6_2	TFAP2C	chr20:55204358-55214339	+	protein_coding	6.6789
ENSG00000087586.17_2	AURKA	chr20:54944445-54967393	-	protein_coding	27.0282
ENSG00000087842.10_2	PIR	chrX:15402921-15511687	-	protein_coding	11.8386
ENSG00000087884.14_3	AAMDC	chr11:77532155-77629478	+	protein_coding	12.6089
ENSG00000087903.12_3	RFX2	chr19:5993175-6199583	-	protein_coding	3.63022
ENSG00000087995.15_2	METTL2A	chr17:60501228-60528183	+	protein_coding	9.65001
ENSG00000088002.11_2	SULT2B1	chr19:49055332-49102682	+	protein_coding	4.18711
ENSG00000088035.15_2	ALG6	chr1:63833261-63904233	+	protein_coding	6.27486
ENSG00000088038.17_3	CNOT3	chr19:54641444-54659419	+	protein_coding	35.5917
ENSG00000088179.8_3	PTPN4	chr2:120517207-120741394	+	protein_coding	0.392303
ENSG00000088205.12_2	DDX18	chr2:118572226-118589955	+	protein_coding	9.40793
ENSG00000088247.17_4	KHSRP	chr19:6413359-6424805	-	protein_coding	125.899
ENSG00000088256.8_2	GNA11	chr19:3094408-3124002	+	protein_coding	14.0713
ENSG00000088280.18_3	ASAP3	chr1:23755056-23811061	-	protein_coding	6.34652
ENSG00000088298.12_2	EDEM2	chr20:33703160-33735167	-	protein_coding	20.8858
ENSG00000088305.18_2	DNMT3B	chr20:31350191-31397162	+	protein_coding	21.8247
ENSG00000088325.15_2	TPX2	chr20:30327074-30389608	+	protein_coding	82.8592
ENSG00000088356.5_2	PDRG1	chr20:30532145-30539895	-	protein_coding	17.341
ENSG00000088367.21_3	EPB41L1	chr20:34679426-34820721	+	protein_coding	4.14759
ENSG00000088387.18_3	DOCK9	chr13:99445683-99738879	-	protein_coding	0.436572
ENSG00000088448.14_3	ANKRD10	chr13:111530887-111567416	-	protein_coding	2.70144
ENSG00000088451.10_2	TGDS	chr13:95226305-95248511	-	protein_coding	4.17263
ENSG00000088538.12_2	DOCK3	chr3:50712672-51421629	+	protein_coding	0.651877
ENSG00000088682.13_3	COQ9	chr16:57481337-57495187	+	protein_coding	19.6596
ENSG00000088727.12_2	KIF9	chr3:47269516-47324941	-	protein_coding	0.810268
ENSG00000088766.11_2	CRLS1	chr20:5986736-6020699	+	protein_coding	4.6658
ENSG00000088808.16_2	PPP1R13B	chr14:104200089-104313927	-	protein_coding	1.96491
ENSG00000088812.17_3	ATRN	chr20:3451687-3631769	+	protein_coding	4.1278
ENSG00000088826.17_2	SMOX	chr20:4101627-4168394	+	protein_coding	5.14596
ENSG00000088832.16_3	FKBP1A	chr20:1349622-1373816	-	protein_coding	36.7747
ENSG00000088833.17_3	NSFL1C	chr20:1422807-1454487	-	protein_coding	20.2041
ENSG00000088836.12_3	SLC4A11	chr20:3208063-3219836	-	protein_coding	4.59037
ENSG00000088854.12_3	C20orf194	chr20:3229951-3388272	-	protein_coding	0.541072
ENSG00000088876.11_3	ZNF343	chr20:2462463-2505348	-	protein_coding	4.29732
ENSG00000088881.20_3	EBF4	chr20:2673524-2740754	+	protein_coding	3.7934
ENSG00000088882.7_2	CPXM1	chr20:2774715-2781283	-	protein_coding	0.554044
ENSG00000088888.17_2	MAVS	chr20:3827446-3856770	+	protein_coding	5.88767
ENSG00000088899.14_2	LZTS3	chr20:3143263-3154238	-	protein_coding	9.20923
ENSG00000088930.7_2	XRN2	chr20:21283942-21370465	+	protein_coding	30.4182
ENSG00000088970.15_3	KIZ	chr20:21106624-21227260	+	protein_coding	2.91135
ENSG00000088986.10_3	DYNLL1	chr12:120907653-120936296	+	protein_coding	79.9294
ENSG00000088992.17_2	TESC	chr12:117476728-117537284	-	protein_coding	11.7434
ENSG00000089006.16_3	SNX5	chr20:17922241-17949623	-	protein_coding	16.5164
ENSG00000089009.15_2	RPL6	chr12:112842994-112856642	-	protein_coding	221.257
ENSG00000089022.13_2	MAPKAPK5	chr12:112279782-112340042	+	protein_coding	2.08144
ENSG00000089048.14_2	ESF1	chr20:13694969-13765532	-	protein_coding	6.09011
ENSG00000089050.15_3	RBBP9	chr20:18467184-18477887	-	protein_coding	2.33188
ENSG00000089053.12_2	ANAPC5	chr12:121746048-121837699	-	protein_coding	11.5297
ENSG00000089057.14_2	SLC23A2	chr20:4833002-4990939	-	protein_coding	4.21162
ENSG00000089060.11_2	SLC8B1	chr12:113736564-113797298	-	protein_coding	2.08482
ENSG00000089063.14_2	TMEM230	chr20:5048878-5093749	-	protein_coding	22.0848
ENSG00000089094.18_3	KDM2B	chr12:121866900-122018920	-	protein_coding	2.60344
ENSG00000089123.15_3	TASP1	chr20:13370039-13619587	-	protein_coding	1.18423
ENSG00000089154.10_2	GCN1	chr12:120565007-120632513	-	protein_coding	18.1848
ENSG00000089157.15_3	RPLP0	chr12:120634489-120639038	-	protein_coding	396.531
ENSG00000089159.16_3	PXN	chr12:120648242-120703574	-	protein_coding	11.4059
ENSG00000089163.4_2	SIRT4	chr12:120740119-120751052	+	protein_coding	4.4357
ENSG00000089177.18_3	KIF16B	chr20:16252749-16554079	-	protein_coding	1.30257
ENSG00000089195.14_2	TRMT6	chr20:5917881-5931204	-	protein_coding	7.28253
ENSG00000089220.4_2	PEBP1	chr12:118573663-118583389	+	protein_coding	254.53
ENSG00000089234.15_3	BRAP	chr12:112079950-112123790	-	protein_coding	6.76933
ENSG00000089248.6_3	ERP29	chr12:112451120-112461255	+	protein_coding	97.236
ENSG00000089280.18_2	FUS	chr16:31191431-31206192	+	protein_coding	66.5666
ENSG00000089289.15_2	IGBP1	chrX:69353299-69386174	+	protein_coding	43.149
ENSG00000089327.14_3	FXYD5	chr19:35645633-35660786	+	protein_coding	74.2122
ENSG00000089335.20_3	ZNF302	chr19:35168544-35177302	+	protein_coding	1.77491
ENSG00000089351.14_3	GRAMD1A	chr19:35485688-35517375	+	protein_coding	19.9051
ENSG00000089486.16_3	CDIP1	chr16:4560676-4588829	-	protein_coding	9.86944
ENSG00000089597.16_2	GANAB	chr11:62392298-62414198	-	protein_coding	96.8399
ENSG00000089639.10_2	GMIP	chr19:19740285-19754476	-	protein_coding	4.17476
ENSG00000089682.16_2	RBM41	chrX:106307650-106362053	-	protein_coding	1.02212
ENSG00000089685.14_3	BIRC5	chr17:76210267-76221717	+	protein_coding	11.1576
ENSG00000089693.10_3	MLF2	chr12:6857162-6876641	-	protein_coding	68.5632
ENSG00000089723.9_2	OTUB2	chr14:94492675-94515276	+	protein_coding	6.90199
ENSG00000089737.16_2	DDX24	chr14:94514637-94547591	-	protein_coding	14.5707
ENSG00000089775.11_2	ZBTB25	chr14:64915824-64971931	-	protein_coding	0.437089
ENSG00000089818.17_2	NECAP1	chr12:8229535-8250455	+	protein_coding	3.29452
ENSG00000089847.12_3	ANKRD24	chr19:4183351-4224811	+	protein_coding	0.655945
ENSG00000089876.11_4	DHX32	chr10:127524906-127585005	-	protein_coding	3.07469
ENSG00000089902.9_2	RCOR1	chr14:103058998-103196913	+	protein_coding	3.28529
ENSG00000089916.17_4	GPATCH2L	chr14:76618259-76720685	+	protein_coding	0.643287
ENSG00000090006.17_2	LTBP4	chr19:41098789-41135723	+	protein_coding	7.04592
ENSG00000090013.9_2	BLVRB	chr19:40953696-40971747	-	protein_coding	49.4153
ENSG00000090020.10_2	SLC9A1	chr1:27425306-27493472	-	protein_coding	4.19977
ENSG00000090054.13_2	SPTLC1	chr9:94794281-94877666	-	protein_coding	8.48462
ENSG00000090060.17_2	PAPOLA	chr14:96967770-97033448	+	protein_coding	7.68167
ENSG00000090061.17_3	CCNK	chr14:99947506-100001381	+	protein_coding	24.5159
ENSG00000090097.21_3	PCBP4	chr3:51991470-52008032	-	protein_coding	7.13897
ENSG00000090238.11_3	YPEL3	chr16:30103635-30108236	-	protein_coding	9.05107
ENSG00000090263.15_3	MRPS33	chr7:140702410-140715028	-	protein_coding	5.87317
ENSG00000090266.12_4	NDUFB2	chr7:140390577-140422590	+	protein_coding	12.3956
ENSG00000090273.13_3	NUDC	chr1:27226729-27273353	+	protein_coding	159.462
ENSG00000090316.15_2	MAEA	chr4:1283639-1333935	+	protein_coding	6.00955
ENSG00000090339.8_2	ICAM1	chr19:10381511-10397291	+	protein_coding	0.512684
ENSG00000090372.14_2	STRN4	chr19:47222764-47250251	-	protein_coding	16.6094
ENSG00000090432.6_2	MUL1	chr1:20825941-20834654	-	protein_coding	10.5273
ENSG00000090447.11_2	TFAP4	chr16:4307187-4323076	-	protein_coding	12.3043
ENSG00000090470.14_3	PDCD7	chr15:65409717-65426174	-	protein_coding	7.40057
ENSG00000090487.10_2	SPG21	chr15:65255362-65282648	-	protein_coding	10.8358
ENSG00000090520.11_3	DNAJB11	chr3:186285192-186303589	+	protein_coding	17.0738
ENSG00000090530.9_3	P3H2	chr3:189674517-189840226	-	protein_coding	0.658558
ENSG00000090534.17_3	THPO	chr3:184089723-184095932	-	protein_coding	0.751166
ENSG00000090539.15_3	CHRD	chr3:184097861-184108524	+	protein_coding	1.81583
ENSG00000090554.12_3	FLT3LG	chr19:49977464-49989488	+	protein_coding	1.14986
ENSG00000090565.15_4	RAB11FIP3	chr16:475619-573011	+	protein_coding	6.33734
ENSG00000090581.9_3	GNPTG	chr16:1401924-1414114	+	protein_coding	5.79433
ENSG00000090615.14_4	GOLGA3	chr12:133345495-133405444	-	protein_coding	4.13192
ENSG00000090621.13_3	PABPC4	chr1:40026488-40042462	-	protein_coding	24.3368
ENSG00000090661.11_2	CERS4	chr19:8271620-8327305	+	protein_coding	6.63931
ENSG00000090674.15_3	MCOLN1	chr19:7587512-7598895	+	protein_coding	6.88417
ENSG00000090686.15_2	USP48	chr1:22004791-22110099	-	protein_coding	4.26157
ENSG00000090776.5_2	EFNB1	chrX:68048840-68061990	+	protein_coding	17.5951
ENSG00000090857.13_2	PDPR	chr16:70147529-70196440	+	protein_coding	3.04299
ENSG00000090861.15_3	AARS	chr16:70286198-70323446	-	protein_coding	119.045
ENSG00000090863.11_3	GLG1	chr16:74481325-74641042	-	protein_coding	9.74005
ENSG00000090889.11_2	KIF4A	chrX:69509940-69640682	+	protein_coding	13.5505
ENSG00000090905.18_3	TNRC6A	chr16:24621530-24838953	+	protein_coding	1.08698
ENSG00000090924.14_3	PLEKHG2	chr19:39903225-39919055	+	protein_coding	3.40353
ENSG00000090932.10_2	DLL3	chr19:39989535-39999121	+	protein_coding	4.11004
ENSG00000090971.4_2	NAT14	chr19:55996371-55998935	+	protein_coding	18.2291
ENSG00000090975.12_3	PITPNM2	chr12:123468027-123634562	-	protein_coding	1.22393
ENSG00000090989.17_2	EXOC1	chr4:56719782-56771200	+	protein_coding	3.17594
ENSG00000091009.7_3	RBM27	chr5:145583163-145668695	+	protein_coding	2.37511
ENSG00000091039.16_3	OSBPL8	chr12:76745577-76953589	-	protein_coding	1.68707
ENSG00000091073.19_3	DTX2	chr7:76090993-76135312	+	protein_coding	4.33272
ENSG00000091127.13_2	PUS7	chr7:105080108-105162714	-	protein_coding	7.41073
ENSG00000091129.19_3	NRCAM	chr7:107788068-108097161	-	protein_coding	1.02596
ENSG00000091136.13_2	LAMB1	chr7:107564244-107643700	-	protein_coding	12.2632
ENSG00000091140.13_2	DLD	chr7:107531415-107572175	+	protein_coding	11.4117
ENSG00000091157.13_3	WDR7	chr18:54318574-54703837	+	protein_coding	0.437576
ENSG00000091164.12_3	TXNL1	chr18:54264439-54318831	-	protein_coding	4.06261
ENSG00000091262.15_2	ABCC6	chr16:16242785-16317379	-	protein_coding	0.704201
ENSG00000091317.7_2	CMTM6	chr3:32522804-32544900	-	protein_coding	5.07036
ENSG00000091409.14_3	ITGA6	chr2:173292082-173371010	+	protein_coding	0.941271
ENSG00000091436.16_2	MAP3K20	chr2:173940163-174132738	+	protein_coding	1.36863
ENSG00000091483.6_2	FH	chr1:241660903-241683061	-	protein_coding	62.9287
ENSG00000091490.10_3	SEL1L3	chr4:25749049-25865382	-	protein_coding	2.84313
ENSG00000091527.15_2	CDV3	chr3:133292574-133309105	+	protein_coding	9.78877
ENSG00000091542.8_2	ALKBH5	chr17:18086392-18113268	+	protein_coding	50.3716
ENSG00000091592.15_3	NLRP1	chr17:5402747-5522744	-	protein_coding	1.11511
ENSG00000091640.7_2	SPAG7	chr17:4862521-4871167	-	protein_coding	22.3415
ENSG00000091651.8_3	ORC6	chr16:46723555-46732306	+	protein_coding	7.32999
ENSG00000091656.15_4	ZFHX4	chr8:77593454-77779521	+	protein_coding	0.856034
ENSG00000091732.15_2	ZC3HC1	chr7:129658126-129691291	-	protein_coding	14.0364
ENSG00000091844.7_2	RGS17	chr6:153325594-153452384	-	protein_coding	0.647928
ENSG00000091947.9_2	TMEM101	chr17:42088556-42101314	-	protein_coding	14.257
ENSG00000091986.15_3	CCDC80	chr3:112315641-112368377	-	protein_coding	1.71267
ENSG00000092010.14_2	PSME1	chr14:24605367-24608176	+	protein_coding	44.6986
ENSG00000092020.10_3	PPP2R3C	chr14:35554673-35591723	-	protein_coding	2.81264
ENSG00000092036.18_4	HAUS4	chr14:23415437-23426370	-	protein_coding	12.2074
ENSG00000092068.19_4	SLC7A8	chr14:23594504-23652883	-	protein_coding	6.96974
ENSG00000092094.10_2	OSGEP	chr14:20914570-20923264	-	protein_coding	15.6459
ENSG00000092096.16_3	SLC22A17	chr14:23815515-23822121	-	protein_coding	2.45029
ENSG00000092098.16_3	RNF31	chr14:24615892-24629870	+	protein_coding	5.68291
ENSG00000092108.20_4	SCFD1	chr14:31091318-31205018	+	protein_coding	3.42509
ENSG00000092140.14_3	G2E3	chr14:31028329-31089269	+	protein_coding	0.867538
ENSG00000092148.12_3	HECTD1	chr14:31569318-31677010	-	protein_coding	1.96043
ENSG00000092199.17_4	HNRNPC	chr14:21677295-21737653	-	protein_coding	93.1369
ENSG00000092201.9_2	SUPT16H	chr14:21819631-21852425	-	protein_coding	36.4627
ENSG00000092203.13_4	TOX4	chr14:21944756-21967319	+	protein_coding	7.76833
ENSG00000092208.16_3	GEMIN2	chr14:39583427-39606177	+	protein_coding	4.23166
ENSG00000092330.15_3	TINF2	chr14:24708849-24711880	-	protein_coding	3.79797
ENSG00000092421.16_2	SEMA6A	chr5:115779312-115910630	-	protein_coding	2.15115
ENSG00000092439.13_4	TRPM7	chr15:50844670-50979012	-	protein_coding	0.93015
ENSG00000092445.11_3	TYRO3	chr15:41849873-41875784	+	protein_coding	6.94608
ENSG00000092470.11_2	WDR76	chr15:44119161-44160617	+	protein_coding	9.29874
ENSG00000092531.9_2	SNAP23	chr15:42783431-42837554	+	protein_coding	2.10774
ENSG00000092621.12_3	PHGDH	chr1:120191034-120286849	+	protein_coding	82.4638
ENSG00000092758.15_3	COL9A3	chr20:61447596-61472511	+	protein_coding	1.70606
ENSG00000092820.17_2	EZR	chr6:159186773-159240444	-	protein_coding	108.606
ENSG00000092841.18_4	MYL6	chr12:56551945-56557280	+	protein_coding	45.6492
ENSG00000092847.11_3	AGO1	chr1:36335409-36396129	+	protein_coding	2.49871
ENSG00000092853.13_2	CLSPN	chr1:36185819-36235568	-	protein_coding	5.85582
ENSG00000092871.16_3	RFFL	chr17:33333009-33416338	-	protein_coding	1.54939
ENSG00000092931.11_3	MFSD11	chr17:74731947-74777531	+	protein_coding	0.703369
ENSG00000092964.17_4	DPYSL2	chr8:26371538-26515694	+	protein_coding	6.0029
ENSG00000092978.10_2	GPATCH2	chr1:217600334-217804424	-	protein_coding	0.808413
ENSG00000093000.18_3	NUP50	chr22:45559722-45583896	+	protein_coding	4.34933
ENSG00000093009.9_2	CDC45	chr22:19466982-19508135	+	protein_coding	47.9735
ENSG00000093010.13_3	COMT	chr22:19929130-19957498	+	protein_coding	12.7578
ENSG00000093144.18_3	ECHDC1	chr6:127609855-127664754	-	protein_coding	3.33191
ENSG00000093167.17_3	LRRFIP2	chr3:37094147-37225180	-	protein_coding	2.95496
ENSG00000093183.13_3	SEC22C	chr3:42589461-42642572	-	protein_coding	1.91826
ENSG00000093217.9_2	XYLB	chr3:38388251-38462839	+	protein_coding	3.88237
ENSG00000094631.18_3	HDAC6	chrX:48659784-48683392	+	protein_coding	7.54479
ENSG00000094804.9_2	CDC6	chr17:38443885-38460909	+	protein_coding	19.6232
ENSG00000094841.13_2	UPRT	chrX:74493920-74524435	+	protein_coding	4.6411
ENSG00000094880.10_2	CDC23	chr5:137523337-137549032	-	protein_coding	14.8501
ENSG00000094914.12_3	AAAS	chr12:53701240-53718648	-	protein_coding	24.8575
ENSG00000094916.15_4	CBX5	chr12:54624724-54673917	-	protein_coding	4.91292
ENSG00000094975.13_2	SUCO	chr1:172501489-172580973	+	protein_coding	0.620785
ENSG00000095002.13_3	MSH2	chr2:47630108-47789450	+	protein_coding	11.3232
ENSG00000095015.5_2	MAP3K1	chr5:56111401-56191979	+	protein_coding	1.36003
ENSG00000095059.15_2	DHPS	chr19:12786531-12792716	-	protein_coding	16.7397
ENSG00000095066.11_4	HOOK2	chr19:12873817-12983554	-	protein_coding	3.36303
ENSG00000095139.13_2	ARCN1	chr11:118443105-118473748	+	protein_coding	22.7611
ENSG00000095203.14_2	EPB41L4B	chr9:111934255-112083244	-	protein_coding	1.26156
ENSG00000095209.11_3	TMEM38B	chr9:108456825-108538893	+	protein_coding	4.50084
ENSG00000095319.14_3	NUP188	chr9:131709978-131769375	+	protein_coding	37.765
ENSG00000095321.16_3	CRAT	chr9:131857089-131873468	-	protein_coding	14.2081
ENSG00000095370.19_2	SH2D3C	chr9:130500596-130541020	-	protein_coding	0.868205
ENSG00000095380.10_2	NANS	chr9:100819021-100845357	+	protein_coding	36.2799
ENSG00000095383.19_2	TBC1D2	chr9:100961281-101018003	-	protein_coding	2.79838
ENSG00000095397.13_3	WHRN	chr9:117164360-117267730	-	protein_coding	5.81498
ENSG00000095485.17_3	CWF19L1	chr10:101992055-102027437	-	protein_coding	7.71768
ENSG00000095539.15_3	SEMA4G	chr10:102729275-102745628	+	protein_coding	2.80246
ENSG00000095564.13_2	BTAF1	chr10:93683526-93790082	+	protein_coding	1.52208
ENSG00000095574.11_2	IKZF5	chr10:124750322-124768333	-	protein_coding	1.1264
ENSG00000095587.8_2	TLL2	chr10:98124363-98273675	-	protein_coding	0.713064
ENSG00000095596.11_2	CYP26A1	chr10:94833232-94837647	+	protein_coding	3.718
ENSG00000095637.21_3	SORBS1	chr10:97071528-97321171	-	protein_coding	0.423534
ENSG00000095713.13_3	CRTAC1	chr10:99624757-99790585	-	protein_coding	3.60965
ENSG00000095739.10_2	BAMBI	chr10:28966271-28971868	+	protein_coding	7.43403
ENSG00000095787.21_3	WAC	chr10:28821422-28912041	+	protein_coding	3.15019
ENSG00000095794.19_4	CREM	chr10:35415719-35501886	+	protein_coding	1.72267
ENSG00000095906.16_3	NUBP2	chr16:1832902-1839192	+	protein_coding	10.5888
ENSG00000095932.6_3	SMIM24	chr19:3473984-3480540	-	protein_coding	0.752198
ENSG00000095951.16_3	HIVEP1	chr6:12008995-12165232	+	protein_coding	0.718834
ENSG00000096060.14_2	FKBP5	chr6:35541362-35696360	-	protein_coding	6.94401
ENSG00000096063.15_3	SRPK1	chr6:35800743-35889119	-	protein_coding	11.7795
ENSG00000096070.19_3	BRPF3	chr6:36164521-36200567	+	protein_coding	2.94041
ENSG00000096080.11_3	MRPS18A	chr6:43639040-43655528	-	protein_coding	82.8004
ENSG00000096092.5_2	TMEM14A	chr6:52535907-52551386	+	protein_coding	11.383
ENSG00000096384.19_2	HSP90AB1	chr6:44213903-44221625	+	protein_coding	730.442
ENSG00000096401.7_2	CDC5L	chr6:44355262-44418163	+	protein_coding	18.4562
ENSG00000096433.10_2	ITPR3	chr6:33588142-33664351	+	protein_coding	10.8779
ENSG00000096654.15_2	ZNF184	chr6:27418522-27440897	-	protein_coding	0.161752
ENSG00000096696.13_3	DSP	chr6:7541808-7586950	+	protein_coding	16.6118
ENSG00000096717.11_2	SIRT1	chr10:69644427-69678147	+	protein_coding	2.45692
ENSG00000096746.17_2	HNRNPH3	chr10:70090931-70102948	+	protein_coding	38.9981
ENSG00000096872.15_2	IFT74	chr9:26947037-27062928	+	protein_coding	2.79086
ENSG00000097007.17_3	ABL1	chr9:133589333-133763062	+	protein_coding	11.8573
ENSG00000097021.19_2	ACOT7	chr1:6324329-6454451	-	protein_coding	57.3333
ENSG00000097033.14_2	SH3GLB1	chr1:87170253-87213867	+	protein_coding	6.28537
ENSG00000097046.12_2	CDC7	chr1:91966450-91991321	+	protein_coding	8.39853
ENSG00000099139.13_3	PCSK5	chr9:78505560-78977255	+	protein_coding	0.920767
ENSG00000099194.5_2	SCD	chr10:102106881-102124591	+	protein_coding	100.396
ENSG00000099203.6_3	TMED1	chr19:10943114-10946994	-	protein_coding	19.3052
ENSG00000099204.18_3	ABLIM1	chr10:116190872-116444762	-	protein_coding	3.4398
ENSG00000099219.13_2	ERMP1	chr9:5765076-5833117	-	protein_coding	2.31314
ENSG00000099246.16_2	RAB18	chr10:27793103-27831166	+	protein_coding	1.24574
ENSG00000099250.17_3	NRP1	chr10:33466420-33625190	-	protein_coding	0.908315
ENSG00000099256.18_2	PRTFDC1	chr10:25137536-25241533	-	protein_coding	8.00274
ENSG00000099260.10_2	PALMD	chr1:100111499-100160097	+	protein_coding	0.467349
ENSG00000099282.9_3	TSPAN15	chr10:71211229-71267425	+	protein_coding	13.3295
ENSG00000099284.13_2	H2AFY2	chr10:71812552-71872036	+	protein_coding	61.1472
ENSG00000099290.15_3	WASHC2A	chr10:51827648-51893266	+	protein_coding	3.70008
ENSG00000099308.10_3	MAST3	chr19:18208603-18262502	+	protein_coding	5.21348
ENSG00000099326.8_2	MZF1	chr19:59073298-59084942	-	protein_coding	1.71295
ENSG00000099330.8_2	OCEL1	chr19:17337013-17340028	+	protein_coding	8.64567
ENSG00000099331.13_3	MYO9B	chr19:17186591-17325346	+	protein_coding	5.33362
ENSG00000099341.11_3	PSMD8	chr19:38865176-38874464	+	protein_coding	119.437
ENSG00000099364.16_3	FBXL19	chr16:30934376-30960104	+	protein_coding	18.0427
ENSG00000099377.13_3	HSD3B7	chr16:30996528-31000473	+	protein_coding	1.95974
ENSG00000099381.17_2	SETD1A	chr16:30968615-30995985	+	protein_coding	20.0723
ENSG00000099385.11_4	BCL7C	chr16:30844947-30906281	-	protein_coding	20.149
ENSG00000099399.5_3	MAGEB2	chrX:30233677-30238206	+	protein_coding	45.7779
ENSG00000099617.3_2	EFNA2	chr19:1286153-1300236	+	protein_coding	6.82453
ENSG00000099622.13_3	CIRBP	chr19:1259383-1274879	+	protein_coding	14.3094
ENSG00000099624.7_3	ATP5D	chr19:1241745-1244825	+	protein_coding	78.1687
ENSG00000099625.12_3	CBARP	chr19:1228286-1238026	-	protein_coding	2.01889
ENSG00000099783.11_3	HNRNPM	chr19:8509651-8553998	+	protein_coding	61.3873
ENSG00000099785.10_2	MARCH2	chr19:8478154-8503901	+	protein_coding	8.53462
ENSG00000099795.6_2	NDUFB7	chr19:14676890-14682874	-	protein_coding	348.206
ENSG00000099797.13_3	TECR	chr19:14627897-14676792	+	protein_coding	48.1815
ENSG00000099800.7_3	TIMM13	chr19:2425622-2427892	-	protein_coding	103.792
ENSG00000099804.8_2	CDC34	chr19:531712-542092	+	protein_coding	53.6938
ENSG00000099810.18_3	MTAP	chr9:21802542-21937650	+	protein_coding	2.91686
ENSG00000099814.15_2	CEP170B	chr14:105331617-105363107	+	protein_coding	3.31185
ENSG00000099817.11_2	POLR2E	chr19:1086578-1095379	-	protein_coding	44.4939
ENSG00000099821.13_2	POLRMT	chr19:617224-633604	-	protein_coding	27.8011
ENSG00000099822.2_2	HCN2	chr19:589893-617159	+	protein_coding	4.06202
ENSG00000099849.14_3	RASSF7	chr11:560404-564021	+	protein_coding	1.63713
ENSG00000099860.8_3	GADD45B	chr19:2476120-2478257	+	protein_coding	24.4609
ENSG00000099864.17_3	PALM	chr19:708939-748329	+	protein_coding	13.0791
ENSG00000099875.14_3	MKNK2	chr19:2037464-2051243	-	protein_coding	16.5507
ENSG00000099889.13_2	ARVCF	chr22:19957419-20004331	-	protein_coding	2.4239
ENSG00000099899.14_4	TRMT2A	chr22:20099389-20104915	-	protein_coding	13.3067
ENSG00000099901.16_3	RANBP1	chr22:20103461-20114880	+	protein_coding	95.7464
ENSG00000099904.15_2	ZDHHC8	chr22:20116979-20135530	+	protein_coding	12.3337
ENSG00000099910.16_3	KLHL22	chr22:20795806-20850170	-	protein_coding	12.3604
ENSG00000099917.17_3	MED15	chr22:20850200-20941919	+	protein_coding	12.3147
ENSG00000099940.11_3	SNAP29	chr22:21213271-21245506	+	protein_coding	17.4667
ENSG00000099942.12_2	CRKL	chr22:21271714-21308037	+	protein_coding	20.5459
ENSG00000099949.18_3	LZTR1	chr22:21333751-21353327	+	protein_coding	11.3822
ENSG00000099953.9_3	MMP11	chr22:24110413-24126503	+	protein_coding	1.65681
ENSG00000099954.18_3	CECR2	chr22:17840839-18037850	+	protein_coding	2.46803
ENSG00000099956.18_4	SMARCB1	chr22:24129150-24176703	+	protein_coding	74.2253
ENSG00000099958.14_2	DERL3	chr22:24176690-24181315	-	protein_coding	1.91737
ENSG00000099968.17_2	BCL2L13	chr22:18111621-18213621	+	protein_coding	10.4537
ENSG00000099974.7_3	DDTL	chr22:24309089-24314721	+	protein_coding	28.8483
ENSG00000099977.13_3	DDT	chr22:24313554-24322660	-	protein_coding	55.1808
ENSG00000099991.17_4	CABIN1	chr22:24407642-24574596	+	protein_coding	20.3067
ENSG00000099992.15_3	TBC1D10A	chr22:30687979-30723035	-	protein_coding	3.15453
ENSG00000099994.10_2	SUSD2	chr22:24577227-24585078	+	protein_coding	1.23464
ENSG00000099995.18_3	SF3A1	chr22:30727977-30752936	-	protein_coding	36.885
ENSG00000099999.14_4	RNF215	chr22:30764800-30817760	-	protein_coding	1.34222
ENSG00000100003.17_3	SEC14L2	chr22:30792846-30821305	+	protein_coding	2.55474
ENSG00000100014.19_4	SPECC1L	chr22:24666785-24813708	+	protein_coding	5.60983
ENSG00000100023.18_3	PPIL2	chr22:22020298-22054304	+	protein_coding	8.8208
ENSG00000100027.14_2	YPEL1	chr22:22051833-22090123	-	protein_coding	0.654849
ENSG00000100028.11_3	SNRPD3	chr22:24951471-25005947	+	protein_coding	120.032
ENSG00000100029.17_2	PES1	chr22:30972612-31003070	-	protein_coding	61.087
ENSG00000100030.14_2	MAPK1	chr22:22108789-22221970	-	protein_coding	5.37337
ENSG00000100031.18_4	GGT1	chr22:24979718-25024972	+	protein_coding	2.3243
ENSG00000100033.16_3	PRODH	chr22:18900290-18924066	-	protein_coding	0.990726
ENSG00000100034.13_3	PPM1F	chr22:22273793-22307209	-	protein_coding	8.44325
ENSG00000100036.12_3	SLC35E4	chr22:31031639-31065003	+	protein_coding	3.15009
ENSG00000100038.19_3	TOP3B	chr22:22311397-22337213	-	protein_coding	6.06774
ENSG00000100053.9_2	CRYBB3	chr22:25595817-25603330	+	protein_coding	0.820743
ENSG00000100056.11_3	ESS2	chr22:19117792-19132197	-	protein_coding	17.6272
ENSG00000100065.14_3	CARD10	chr22:37886400-37915549	-	protein_coding	3.6336
ENSG00000100068.11_3	LRP5L	chr22:25747385-25801344	-	protein_coding	0.830201
ENSG00000100075.9_2	SLC25A1	chr22:19163088-19166343	-	protein_coding	161.068
ENSG00000100077.14_3	GRK3	chr22:25960816-26125261	+	protein_coding	2.08625
ENSG00000100083.18_3	GGA1	chr22:38004482-38029571	+	protein_coding	10.1473
ENSG00000100084.14_3	HIRA	chr22:19318221-19434973	-	protein_coding	22.1622
ENSG00000100092.20_3	SH3BP1	chr22:38030661-38062939	+	protein_coding	18.517
ENSG00000100097.11_2	LGALS1	chr22:38071615-38075813	+	protein_coding	14.0791
ENSG00000100099.20_2	HPS4	chr22:26839389-26879803	-	protein_coding	2.60861
ENSG00000100100.12_3	PIK3IP1	chr22:31677579-31688520	-	protein_coding	1.46289
ENSG00000100104.13_3	SRRD	chr22:26879843-26890624	+	protein_coding	8.74368
ENSG00000100105.17_3	PATZ1	chr22:31721790-31742218	-	protein_coding	7.54046
ENSG00000100106.19_4	TRIOBP	chr22:38093011-38172563	+	protein_coding	3.7375
ENSG00000100109.16_3	TFIP11	chr22:26887191-26908471	-	protein_coding	11.9883
ENSG00000100116.16_3	GCAT	chr22:38203912-38213183	+	protein_coding	22.502
ENSG00000100124.14_3	ANKRD54	chr22:38226862-38245334	-	protein_coding	13.596
ENSG00000100129.17_4	EIF3L	chr22:38244875-38285414	+	protein_coding	96.3233
ENSG00000100138.13_2	SNU13	chr22:42069934-42086508	-	protein_coding	63.8981
ENSG00000100139.13_3	MICALL1	chr22:38301664-38338829	+	protein_coding	13.6503
ENSG00000100142.14_3	POLR2F	chr22:38348614-38437922	+	protein_coding	24.323
ENSG00000100147.13_2	CCDC134	chr22:42196683-42222303	+	protein_coding	6.39642
ENSG00000100150.16_3	DEPDC5	chr22:32149937-32303020	+	protein_coding	1.55597
ENSG00000100151.15_2	PICK1	chr22:38452318-38471708	+	protein_coding	11.2707
ENSG00000100154.14_2	TTC28	chr22:28374002-29075853	-	protein_coding	2.29713
ENSG00000100162.14_2	CENPM	chr22:42334725-42343168	-	protein_coding	18.1484
ENSG00000100167.19_2	SEPT3	chr22:42372276-42394225	+	protein_coding	22.1072
ENSG00000100196.10_2	KDELR3	chr22:38864067-38879452	+	protein_coding	14.9255
ENSG00000100201.20_2	DDX17	chr22:38879445-38903665	-	protein_coding	27.7127
ENSG00000100206.9_2	DMC1	chr22:38914954-38966291	-	protein_coding	3.45471
ENSG00000100207.18_4	TCF20	chr22:42556019-42739622	-	protein_coding	4.57496
ENSG00000100209.9_2	HSCB	chr22:29138019-29153503	+	protein_coding	7.11734
ENSG00000100211.10_2	CBY1	chr22:39052641-39069859	+	protein_coding	25.2218
ENSG00000100216.5_2	TOMM22	chr22:39077953-39081426	+	protein_coding	86.7309
ENSG00000100218.11_2	RSPH14	chr22:23401593-23487208	-	protein_coding	0.61934
ENSG00000100219.16_4	XBP1	chr22:29190543-29196585	-	protein_coding	57.1589
ENSG00000100220.11_2	RTCB	chr22:32783569-32808242	-	protein_coding	67.0263
ENSG00000100221.10_3	JOSD1	chr22:39081548-39097561	-	protein_coding	13.6764
ENSG00000100225.17_2	FBXO7	chr22:32870663-32894816	+	protein_coding	12.9792
ENSG00000100226.15_3	GTPBP1	chr22:39101728-39134304	+	protein_coding	10.842
ENSG00000100227.17_2	POLDIP3	chr22:42979727-43010968	-	protein_coding	18.6903
ENSG00000100228.12_2	RAB36	chr22:23487513-23506537	+	protein_coding	2.37377
ENSG00000100234.11_2	TIMP3	chr22:33197687-33259030	+	protein_coding	16.9463
ENSG00000100239.15_3	PPP6R2	chr22:50781733-50883519	+	protein_coding	17.4359
ENSG00000100241.20_3	SBF1	chr22:50883429-50913453	-	protein_coding	18.6677
ENSG00000100242.15_3	SUN2	chr22:39130730-39190148	-	protein_coding	6.376
ENSG00000100243.20_3	CYB5R3	chr22:43013846-43045574	-	protein_coding	35.6928
ENSG00000100246.12_3	DNAL4	chr22:39174513-39190203	-	protein_coding	8.26949
ENSG00000100258.17_3	LMF2	chr22:50941378-50946120	-	protein_coding	28.1965
ENSG00000100263.13_3	RHBDD3	chr22:29655841-29664198	-	protein_coding	6.59477
ENSG00000100266.18_3	PACSIN2	chr22:43231418-43411151	-	protein_coding	26.7161
ENSG00000100271.16_2	TTLL1	chr22:43435650-43485434	-	protein_coding	15.3026
ENSG00000100276.9_3	RASL10A	chr22:29708922-29715668	-	protein_coding	1.67562
ENSG00000100280.16_2	AP1B1	chr22:29723669-29819168	-	protein_coding	36.7473
ENSG00000100281.13_3	HMGXB4	chr22:35653445-35691800	+	protein_coding	3.85903
ENSG00000100284.20_3	TOM1	chr22:35695268-35743987	+	protein_coding	6.77649
ENSG00000100288.19_3	CHKB	chr22:51017378-51039884	-	protein_coding	3.66611
ENSG00000100290.2_2	BIK	chr22:43506754-43525718	+	protein_coding	2.10465
ENSG00000100292.16_2	HMOX1	chr22:35776354-35790207	+	protein_coding	15.9002
ENSG00000100294.12_2	MCAT	chr22:43528212-43539400	-	protein_coding	22.827
ENSG00000100296.13_3	THOC5	chr22:29901868-29951205	-	protein_coding	14.9286
ENSG00000100297.15_3	MCM5	chr22:35796056-35821423	+	protein_coding	56.0713
ENSG00000100298.15_2	APOBEC3H	chr22:39493229-39500072	+	protein_coding	0.664682
ENSG00000100299.17_2	ARSA	chr22:51061182-51066601	-	protein_coding	5.64358
ENSG00000100300.17_2	TSPO	chr22:43547520-43559248	+	protein_coding	57.174
ENSG00000100302.6_2	RASD2	chr22:35936915-35950048	+	protein_coding	2.99361
ENSG00000100304.12_2	TTLL12	chr22:43562628-43583139	-	protein_coding	45.6858
ENSG00000100307.12_3	CBX7	chr22:39516172-39548679	-	protein_coding	1.18775
ENSG00000100311.16_2	PDGFB	chr22:39619364-39640756	-	protein_coding	0.5596
ENSG00000100312.10_2	ACR	chr22:51176624-51183762	+	protein_coding	0.780788
ENSG00000100314.3_2	CABP7	chr22:30116073-30127828	+	protein_coding	0.44733
ENSG00000100316.15_2	RPL3	chr22:39708887-39716394	-	protein_coding	312.285
ENSG00000100319.12_2	ZMAT5	chr22:30126945-30163000	-	protein_coding	22.9774
ENSG00000100320.22_3	RBFOX2	chr22:36134783-36424473	-	protein_coding	8.97408
ENSG00000100321.14_3	SYNGR1	chr22:39745930-39781593	+	protein_coding	11.9634
ENSG00000100324.13_2	TAB1	chr22:39795746-39833065	+	protein_coding	26.6427
ENSG00000100325.14_3	ASCC2	chr22:30184597-30234293	-	protein_coding	17.9844
ENSG00000100330.15_3	MTMR3	chr22:30279144-30426855	+	protein_coding	2.36045
ENSG00000100335.13_3	MIEF1	chr22:39895437-39914137	+	protein_coding	7.57948
ENSG00000100344.10_3	PNPLA3	chr22:44319619-44360368	+	protein_coding	2.31876
ENSG00000100345.20_2	MYH9	chr22:36677327-36784063	-	protein_coding	61.2435
ENSG00000100347.14_3	SAMM50	chr22:44351301-44406411	+	protein_coding	20.875
ENSG00000100348.9_2	TXN2	chr22:36863083-36878077	-	protein_coding	73.1112
ENSG00000100350.14_3	FOXRED2	chr22:36883237-36903148	-	protein_coding	24.0642
ENSG00000100353.17_2	EIF3D	chr22:36906897-36925483	-	protein_coding	122.478
ENSG00000100354.20_4	TNRC6B	chr22:40440821-40731812	+	protein_coding	1.91969
ENSG00000100359.20_3	SGSM3	chr22:40766595-40806293	+	protein_coding	11.2546
ENSG00000100360.14_3	IFT27	chr22:37154246-37172300	-	protein_coding	3.91552
ENSG00000100362.12_2	PVALB	chr22:37196728-37215523	-	protein_coding	2.40119
ENSG00000100364.18_3	KIAA0930	chr22:45586219-45636650	-	protein_coding	12.6225
ENSG00000100372.14_3	SLC25A17	chr22:41165634-41215403	-	protein_coding	8.84949
ENSG00000100376.11_2	FAM118A	chr22:45704849-45737836	+	protein_coding	5.01542
ENSG00000100379.17_3	KCTD17	chr22:37447776-37459430	+	protein_coding	17.9309
ENSG00000100380.13_3	ST13	chr22:41220539-41253026	-	protein_coding	100.127
ENSG00000100385.13_2	IL2RB	chr22:37521878-37571094	-	protein_coding	0.519337
ENSG00000100387.8_2	RBX1	chr22:41347351-41369313	+	protein_coding	16.2932
ENSG00000100393.12_3	EP300	chr22:41487790-41576083	+	protein_coding	6.45888
ENSG00000100395.14_2	L3MBTL2	chr22:41601209-41627275	+	protein_coding	10.4075
ENSG00000100401.19_3	RANGAP1	chr22:41641615-41682255	-	protein_coding	50.8434
ENSG00000100403.11_2	ZC3H7B	chr22:41697526-41756151	+	protein_coding	12.8975
ENSG00000100410.7_2	PHF5A	chr22:41855721-41864729	-	protein_coding	76.9829
ENSG00000100412.15_2	ACO2	chr22:41865129-41924993	+	protein_coding	68.4874
ENSG00000100413.16_2	POLR3H	chr22:41921808-41940610	-	protein_coding	14.2349
ENSG00000100416.12_2	TRMU	chr22:46726772-46753237	+	protein_coding	5.00486
ENSG00000100417.11_2	PMM1	chr22:41972898-41985894	-	protein_coding	7.52936
ENSG00000100418.7_2	DESI1	chr22:41994032-42017100	-	protein_coding	23.1213
ENSG00000100422.13_2	CERK	chr22:47080308-47134158	-	protein_coding	14.6333
ENSG00000100425.18_2	BRD1	chr22:50166931-50221160	-	protein_coding	6.2637
ENSG00000100426.6_3	ZBED4	chr22:50247490-50283726	+	protein_coding	7.07445
ENSG00000100427.15_3	MLC1	chr22:50497820-50524331	-	protein_coding	0.655345
ENSG00000100429.17_3	HDAC10	chr22:50683612-50689834	-	protein_coding	2.65119
ENSG00000100439.10_2	ABHD4	chr14:23067146-23082121	+	protein_coding	6.40691
ENSG00000100441.9_2	KHNYN	chr14:24898492-24911040	+	protein_coding	4.40965
ENSG00000100442.10_2	FKBP3	chr14:45584803-45604522	-	protein_coding	27.6383
ENSG00000100445.17_3	SDR39U1	chr14:24908972-24912111	-	protein_coding	6.86247
ENSG00000100461.17_3	RBM23	chr14:23362415-23388393	-	protein_coding	4.02797
ENSG00000100462.15_3	PRMT5	chr14:23389720-23398794	-	protein_coding	62.7715
ENSG00000100473.15_2	COCH	chr14:31343720-31364271	+	protein_coding	8.91911
ENSG00000100478.14_4	AP4S1	chr14:31494312-31565656	+	protein_coding	0.199175
ENSG00000100479.12_2	POLE2	chr14:50110273-50155140	-	protein_coding	5.7676
ENSG00000100483.13_3	VCPKMT	chr14:50575350-50583318	-	protein_coding	1.19935
ENSG00000100485.11_2	SOS2	chr14:50583838-50698276	-	protein_coding	0.885794
ENSG00000100503.23_3	NIN	chr14:51186481-51297839	-	protein_coding	1.53167
ENSG00000100504.16_2	PYGL	chr14:51324609-51411454	-	protein_coding	53.521
ENSG00000100505.13_2	TRIM9	chr14:51441980-51562779	-	protein_coding	1.88203
ENSG00000100519.11_3	PSMC6	chr14:53173890-53195305	+	protein_coding	4.00758
ENSG00000100522.8_2	GNPNAT1	chr14:53241912-53258386	-	protein_coding	4.97824
ENSG00000100523.14_3	DDHD1	chr14:53503463-53620000	-	protein_coding	0.564217
ENSG00000100526.19_3	CDKN3	chr14:54863567-54886936	+	protein_coding	11.4862
ENSG00000100528.11_2	CNIH1	chr14:54890278-54908149	-	protein_coding	8.31682
ENSG00000100532.11_2	CGRRF1	chr14:54976530-55006027	+	protein_coding	0.497825
ENSG00000100554.11_3	ATP6V1D	chr14:67761088-67826982	-	protein_coding	4.39822
ENSG00000100564.8_3	PIGH	chr14:68048672-68067004	-	protein_coding	3.02687
ENSG00000100567.12_3	PSMA3	chr14:58711549-58738730	+	protein_coding	12.9184
ENSG00000100568.10_3	VTI1B	chr14:68113792-68141548	-	protein_coding	5.91808
ENSG00000100575.13_2	TIMM9	chr14:58875212-58894332	-	protein_coding	13.4541
ENSG00000100577.18_2	GSTZ1	chr14:77787227-77797940	+	protein_coding	3.57936
ENSG00000100578.14_4	KIAA0586	chr14:58894103-59018007	+	protein_coding	1.18138
ENSG00000100580.7_2	TMED8	chr14:77801364-77843452	-	protein_coding	2.94211
ENSG00000100591.7_3	AHSA1	chr14:77924213-77935817	+	protein_coding	96.5866
ENSG00000100592.15_2	DAAM1	chr14:59655364-59838123	+	protein_coding	1.00389
ENSG00000100593.17_3	ISM2	chr14:77940737-77965193	-	protein_coding	1.1031
ENSG00000100596.6_3	SPTLC2	chr14:77972340-78083116	-	protein_coding	4.43771
ENSG00000100599.15_4	RIN3	chr14:92980118-93155339	+	protein_coding	2.40469
ENSG00000100600.14_3	LGMN	chr14:93170152-93215047	-	protein_coding	31.9678
ENSG00000100601.9_3	ALKBH1	chr14:78138747-78174363	-	protein_coding	7.59365
ENSG00000100603.13_2	SNW1	chr14:78183942-78227550	-	protein_coding	43.0126
ENSG00000100605.16_3	ITPK1	chr14:93403259-93582665	-	protein_coding	23.6663
ENSG00000100612.13_2	DHRS7	chr14:60610838-60636574	-	protein_coding	11.1771
ENSG00000100614.17_3	PPM1A	chr14:60712470-60765805	+	protein_coding	1.68753
ENSG00000100625.8_3	SIX4	chr14:61176246-61191066	-	protein_coding	1.75225
ENSG00000100626.16_3	GALNT16	chr14:69725994-69823750	+	protein_coding	3.90633
ENSG00000100629.16_3	CEP128	chr14:80943326-81425861	-	protein_coding	0.939869
ENSG00000100632.10_2	ERH	chr14:69846840-69865344	-	protein_coding	155.488
ENSG00000100644.16_3	HIF1A	chr14:62162231-62214977	+	protein_coding	4.77227
ENSG00000100647.7_2	SUSD6	chr14:70078313-70181859	+	protein_coding	1.97294
ENSG00000100650.15_3	SRSF5	chr14:70193617-70238722	+	protein_coding	21.0663
ENSG00000100664.10_3	EIF5	chr14:103799881-103811362	+	protein_coding	6.81864
ENSG00000100697.14_2	DICER1	chr14:95552565-95624347	-	protein_coding	1.57959
ENSG00000100711.13_2	ZFYVE21	chr14:104182067-104200005	+	protein_coding	2.53755
ENSG00000100714.15_3	MTHFD1	chr14:64854749-64930175	+	protein_coding	59.202
ENSG00000100722.18_2	ZC3H14	chr14:89029253-89093940	+	protein_coding	2.03641
ENSG00000100726.14_2	TELO2	chr16:1543345-1560458	+	protein_coding	14.1558
ENSG00000100731.15_3	PCNX1	chr14:71374122-71582099	+	protein_coding	1.10763
ENSG00000100744.14_2	GSKIP	chr14:96829789-96853625	+	protein_coding	0.962722
ENSG00000100749.7_3	VRK1	chr14:97263641-97398059	+	protein_coding	24.3279
ENSG00000100764.13_3	PSMC1	chr14:90722839-90741773	+	protein_coding	19.965
ENSG00000100796.17_2	PPP4R3A	chr14:91923955-91976898	-	protein_coding	4.49
ENSG00000100802.14_3	C14orf93	chr14:23455117-23479375	-	protein_coding	2.52755
ENSG00000100804.18_3	PSMB5	chr14:23485752-23504439	-	protein_coding	80.6953
ENSG00000100811.12_3	YY1	chr14:100704635-100749129	+	protein_coding	8.43539
ENSG00000100813.14_3	ACIN1	chr14:23527773-23564823	-	protein_coding	33.4169
ENSG00000100814.17_2	CCNB1IP1	chr14:20779527-20801471	-	protein_coding	17.5072
ENSG00000100815.12_4	TRIP11	chr14:92432335-92507240	-	protein_coding	0.931331
ENSG00000100823.11_3	APEX1	chr14:20923350-20925931	+	protein_coding	95.6501
ENSG00000100836.10_3	PABPN1	chr14:23790498-23795394	+	protein_coding	54.0109
ENSG00000100852.12_3	ARHGAP5	chr14:32545320-32628934	+	protein_coding	0.542387
ENSG00000100865.14_2	CINP	chr14:102807439-102829253	-	protein_coding	10.7732
ENSG00000100867.14_3	DHRS2	chr14:24099324-24114848	+	protein_coding	3.2946
ENSG00000100883.11_3	SRP54	chr14:35451163-35498773	+	protein_coding	20.1146
ENSG00000100888.12_3	CHD8	chr14:21853353-21924285	-	protein_coding	7.7674
ENSG00000100889.11_2	PCK2	chr14:24563262-24579807	+	protein_coding	56.3991
ENSG00000100890.15_3	KIAA0391	chr14:35591052-35746820	+	protein_coding	3.10615
ENSG00000100897.17_3	DCAF11	chr14:24583404-24594451	+	protein_coding	8.93607
ENSG00000100902.10_3	PSMA6	chr14:35747839-35786699	+	protein_coding	14.2699
ENSG00000100906.10_2	NFKBIA	chr14:35870717-35873955	-	protein_coding	25.672
ENSG00000100908.13_2	EMC9	chr14:24608168-24610797	-	protein_coding	13.7821
ENSG00000100911.15_3	PSME2	chr14:24612571-24616779	-	protein_coding	15.0631
ENSG00000100916.13_3	BRMS1L	chr14:36295524-36401531	+	protein_coding	2.29185
ENSG00000100926.14_3	TM9SF1	chr14:24658349-24664893	-	protein_coding	6.41141
ENSG00000100934.14_3	SEC23A	chr14:39501123-39578850	-	protein_coding	5.45399
ENSG00000100938.17_2	GMPR2	chr14:24701628-24708448	+	protein_coding	14.2085
ENSG00000100941.8_2	PNN	chr14:39644387-39652422	+	protein_coding	25.7528
ENSG00000100949.14_2	RABGGTA	chr14:24734744-24740945	-	protein_coding	6.80709
ENSG00000100968.13_2	NFATC4	chr14:24834879-24848810	+	protein_coding	2.35271
ENSG00000100979.14_3	PLTP	chr20:44527260-44540794	-	protein_coding	104.354
ENSG00000100982.11_2	PCIF1	chr20:44563267-44576662	+	protein_coding	18.3416
ENSG00000100983.9_2	GSS	chr20:33516233-33543620	-	protein_coding	60.6906
ENSG00000100985.7_2	MMP9	chr20:44637547-44645200	+	protein_coding	0.492786
ENSG00000100991.11_2	TRPC4AP	chr20:33590207-33680674	-	protein_coding	29.2524
ENSG00000100994.11_3	PYGB	chr20:25228705-25278650	+	protein_coding	12.0243
ENSG00000100997.18_3	ABHD12	chr20:25275379-25371619	-	protein_coding	15.6698
ENSG00000101000.5_3	PROCR	chr20:33759876-33804043	+	protein_coding	51.706
ENSG00000101003.9_2	GINS1	chr20:25388363-25433264	+	protein_coding	8.25488
ENSG00000101004.14_3	NINL	chr20:25433341-25566153	-	protein_coding	2.5771
ENSG00000101017.13_3	CD40	chr20:44746911-44758502	+	protein_coding	3.77021
ENSG00000101019.21_3	UQCC1	chr20:33890369-33999944	-	protein_coding	6.34289
ENSG00000101040.19_3	ZMYND8	chr20:45837859-45985633	-	protein_coding	5.92047
ENSG00000101052.12_2	IFT52	chr20:42219571-42275936	+	protein_coding	6.55148
ENSG00000101057.15_2	MYBL2	chr20:42295659-42345136	+	protein_coding	244.283
ENSG00000101079.20_2	NDRG3	chr20:35280169-35374481	-	protein_coding	26.1448
ENSG00000101084.17_3	C20orf24	chr20:35234137-35240960	+	protein_coding	33.4116
ENSG00000101098.12_2	RIMS4	chr20:43380449-43438979	-	protein_coding	14.0059
ENSG00000101104.12_2	PABPC1L	chr20:43538703-43587676	+	protein_coding	1.20602
ENSG00000101109.11_2	STK4	chr20:43595115-43708600	+	protein_coding	0.833274
ENSG00000101126.15_3	ADNP	chr20:49505456-49547777	-	protein_coding	8.48935
ENSG00000101132.9_2	PFDN4	chr20:52824386-52844591	+	protein_coding	30.264
ENSG00000101138.11_3	CSTF1	chr20:54967427-54981425	+	protein_coding	11.2928
ENSG00000101144.12_2	BMP7	chr20:55743804-55841685	-	protein_coding	15.6346
ENSG00000101146.12_3	RAE1	chr20:55926066-55954267	+	protein_coding	13.3954
ENSG00000101150.17_3	TPD52L2	chr20:62496581-62522898	+	protein_coding	20.5642
ENSG00000101152.10_2	DNAJC5	chr20:62526535-62567384	+	protein_coding	16.7546
ENSG00000101158.13_3	NELFCD	chr20:57556263-57570188	+	protein_coding	17.7621
ENSG00000101161.7_2	PRPF6	chr20:62612488-62664453	+	protein_coding	88.6936
ENSG00000101166.15_2	PRELID3B	chr20:57608200-57617964	-	protein_coding	23.1506
ENSG00000101181.17_3	MTG2	chr20:60758085-60778624	+	protein_coding	5.13773
ENSG00000101182.14_3	PSMA7	chr20:60711791-60718496	-	protein_coding	122.065
ENSG00000101187.15_2	SLCO4A1	chr20:61273797-61317137	+	protein_coding	8.34718
ENSG00000101189.6_2	MRGBP	chr20:61427805-61433090	+	protein_coding	31.4493
ENSG00000101190.12_2	TCFL5	chr20:61472467-61493115	-	protein_coding	9.58991
ENSG00000101191.16_3	DIDO1	chr20:61509090-61569304	-	protein_coding	4.47204
ENSG00000101193.7_2	GID8	chr20:61569471-61579827	+	protein_coding	16.2485
ENSG00000101199.12_3	ARFGAP1	chr20:61904137-61921145	+	protein_coding	7.23082
ENSG00000101204.16_3	CHRNA4	chr20:61974575-62009753	-	protein_coding	1.21707
ENSG00000101210.10_2	EEF1A2	chr20:62119366-62130668	-	protein_coding	615.614
ENSG00000101216.10_2	GMEB2	chr20:62218955-62258394	-	protein_coding	5.22054
ENSG00000101220.17_2	C20orf27	chr20:3734155-3749034	-	protein_coding	74.4963
ENSG00000101224.17_3	CDC25B	chr20:3767419-3786768	+	protein_coding	20.3678
ENSG00000101230.5_2	ISM1	chr20:13202418-13281298	+	protein_coding	0.37163
ENSG00000101236.16_2	RNF24	chr20:3907956-3996229	-	protein_coding	1.14852
ENSG00000101246.19_2	ARFRP1	chr20:62329995-62339377	-	protein_coding	1.74136
ENSG00000101247.17_3	NDUFAF5	chr20:13765596-13802228	+	protein_coding	1.67252
ENSG00000101255.10_3	TRIB3	chr20:343479-378203	+	protein_coding	11.3408
ENSG00000101265.15_2	RASSF2	chr20:4760669-4804291	-	protein_coding	1.50247
ENSG00000101266.17_3	CSNK2A1	chr20:454235-524465	-	protein_coding	33.1606
ENSG00000101290.13_3	CDS2	chr20:5107432-5178533	+	protein_coding	5.99971
ENSG00000101294.16_3	HM13	chr20:30102231-30165726	+	protein_coding	17.7141
ENSG00000101298.13_3	SNPH	chr20:1246960-1289972	+	protein_coding	1.59269
ENSG00000101310.14_3	SEC23B	chr20:18488137-18542059	+	protein_coding	20.8892
ENSG00000101311.15_2	FERMT1	chr20:6055492-6104191	-	protein_coding	1.10587
ENSG00000101331.15_3	CCM2L	chr20:30598253-30619983	+	protein_coding	2.43102
ENSG00000101333.16_2	PLCB4	chr20:9049410-9461889	+	protein_coding	0.331547
ENSG00000101335.9_2	MYL9	chr20:35169887-35179850	+	protein_coding	0.773877
ENSG00000101337.15_3	TM9SF4	chr20:30697309-30755061	+	protein_coding	22.3647
ENSG00000101343.14_2	CRNKL1	chr20:20015012-20036690	-	protein_coding	5.70578
ENSG00000101346.13_3	POFUT1	chr20:30795683-30826470	+	protein_coding	14.5834
ENSG00000101347.8_2	SAMHD1	chr20:35518632-35580246	-	protein_coding	9.03435
ENSG00000101350.7_2	KIF3B	chr20:30865467-30922814	+	protein_coding	2.27569
ENSG00000101361.16_3	NOP56	chr20:2632791-2639039	+	protein_coding	57.944
ENSG00000101363.12_2	MANBAL	chr20:35918041-35945663	+	protein_coding	32.9606
ENSG00000101365.20_3	IDH3B	chr20:2639041-2644865	-	protein_coding	46.2859
ENSG00000101367.8_2	MAPRE1	chr20:31407699-31438211	+	protein_coding	58.7941
ENSG00000101384.11_2	JAG1	chr20:10618332-10654755	-	protein_coding	0.971789
ENSG00000101391.20_3	CDK5RAP1	chr20:31946645-31989367	-	protein_coding	16.9149
ENSG00000101400.5_2	SNTA1	chr20:31995761-32031698	-	protein_coding	26.0322
ENSG00000101407.12_2	TTI1	chr20:36611409-36661870	-	protein_coding	10.3362
ENSG00000101412.12_2	E2F1	chr20:32263489-32274210	-	protein_coding	31.0569
ENSG00000101413.11_2	RPRD1B	chr20:36661948-36756182	+	protein_coding	4.88981
ENSG00000101417.11_2	PXMP4	chr20:32290560-32308125	-	protein_coding	0.937332
ENSG00000101421.3_2	CHMP4B	chr20:32399110-32442172	+	protein_coding	109.024
ENSG00000101439.8_3	CST3	chr20:23607343-23619110	-	protein_coding	40.1573
ENSG00000101442.9_2	ACTR5	chr20:37377085-37401163	+	protein_coding	6.44339
ENSG00000101443.17_2	WFDC2	chr20:44098346-44110172	+	protein_coding	0.602534
ENSG00000101444.12_3	AHCY	chr20:32868074-32899608	-	protein_coding	175.53
ENSG00000101445.9_2	PPP1R16B	chr20:37434348-37551667	+	protein_coding	2.59551
ENSG00000101447.14_2	FAM83D	chr20:37554955-37581749	+	protein_coding	13.8529
ENSG00000101452.14_3	DHX35	chr20:37590942-37668366	+	protein_coding	3.12021
ENSG00000101457.12_3	DNTTIP1	chr20:44420576-44440066	+	protein_coding	51.2418
ENSG00000101463.5_2	SYNDIG1	chr20:24449835-24647252	+	protein_coding	0.327573
ENSG00000101464.10_3	PIGU	chr20:33148346-33286594	-	protein_coding	14.4675
ENSG00000101473.16_2	ACOT8	chr20:44470360-44486045	-	protein_coding	6.23808
ENSG00000101474.11_3	APMAP	chr20:24943561-24973615	-	protein_coding	36.2654
ENSG00000101493.10_3	ZNF516	chr18:74070145-74207146	-	protein_coding	2.51811
ENSG00000101544.8_2	ADNP2	chr18:77866915-77905406	+	protein_coding	4.31703
ENSG00000101546.12_3	RBFA	chr18:77794358-77806397	+	protein_coding	18.4087
ENSG00000101557.14_3	USP14	chr18:158383-214629	+	protein_coding	10.3464
ENSG00000101558.13_2	VAPA	chr18:9913999-9960018	+	protein_coding	5.23403
ENSG00000101574.14_3	METTL4	chr18:2537524-2571508	-	protein_coding	0.301327
ENSG00000101577.9_3	LPIN2	chr18:2916992-3013313	-	protein_coding	1.03464
ENSG00000101596.14_3	SMCHD1	chr18:2655737-2805015	+	protein_coding	0.394049
ENSG00000101608.12_3	MYL12A	chr18:3247479-3256234	+	protein_coding	18.8493
ENSG00000101624.10_3	CEP76	chr18:12661832-12702776	-	protein_coding	1.11177
ENSG00000101639.18_3	CEP192	chr18:12991361-13125051	+	protein_coding	0.910197
ENSG00000101654.17_3	RNMT	chr18:13726659-13764557	+	protein_coding	1.10621
ENSG00000101665.8_2	SMAD7	chr18:46446223-46477081	-	protein_coding	3.58109
ENSG00000101680.14_2	LAMA1	chr18:6941743-7117813	-	protein_coding	2.61065
ENSG00000101695.8_3	RNF125	chr18:29598335-29653176	+	protein_coding	1.96244
ENSG00000101752.11_2	MIB1	chr18:19284918-19450918	+	protein_coding	1.84857
ENSG00000101773.18_3	RBBP8	chr18:20378224-20606451	+	protein_coding	4.92145
ENSG00000101782.14_3	RIOK3	chr18:21032787-21066567	+	protein_coding	2.50598
ENSG00000101811.13_2	CSTF2	chrX:100075348-100095921	+	protein_coding	38.4796
ENSG00000101843.18_2	PSMD10	chrX:107327437-107334848	-	protein_coding	21.0646
ENSG00000101844.17_3	ATG4A	chrX:107334898-107397901	+	protein_coding	3.951
ENSG00000101849.15_4	TBL1X	chrX:9431335-9687783	+	protein_coding	14.4399
ENSG00000101856.9_2	PGRMC1	chrX:118370208-118378429	+	protein_coding	115.562
ENSG00000101868.10_2	POLA1	chrX:24712036-25015103	+	protein_coding	11.6843
ENSG00000101871.14_3	MID1	chrX:10413350-10851773	-	protein_coding	10.0083
ENSG00000101882.9_2	NKAP	chrX:119054635-119077735	-	protein_coding	4.69156
ENSG00000101888.11_2	NXT2	chrX:108779010-108787919	+	protein_coding	1.66382
ENSG00000101901.11_3	ALG13	chrX:110909039-111003877	+	protein_coding	3.56937
ENSG00000101911.12_3	PRPS2	chrX:12809474-12842341	+	protein_coding	30.0413
ENSG00000101928.12_2	MOSPD1	chrX:134021656-134049297	-	protein_coding	3.59874
ENSG00000101935.9_3	AMMECR1	chrX:109437414-109683461	-	protein_coding	2.36994
ENSG00000101938.14_2	CHRDL1	chrX:109917084-110039047	-	protein_coding	0.189183
ENSG00000101940.17_2	WDR13	chrX:48448430-48467255	+	protein_coding	6.32599
ENSG00000101945.16_2	SUV39H1	chrX:48553945-48567403	+	protein_coding	23.9894
ENSG00000101955.14_3	SRPX	chrX:38008589-38080177	-	protein_coding	7.96559
ENSG00000101966.12_3	XIAP	chrX:122993574-123047829	+	protein_coding	1.40871
ENSG00000101972.18_3	STAG2	chrX:123094062-123556514	+	protein_coding	8.548
ENSG00000101974.14_2	ATP11C	chrX:138808505-139027435	-	protein_coding	3.61577
ENSG00000101986.11_2	ABCD1	chrX:152990323-153010216	+	protein_coding	12.2199
ENSG00000101997.12_2	CCDC22	chrX:49091927-49106987	+	protein_coding	16.0003
ENSG00000102003.10_3	SYP	chrX:49044257-49056718	-	protein_coding	4.28164
ENSG00000102007.10_2	PLP2	chrX:49028273-49031588	+	protein_coding	99.4265
ENSG00000102024.17_3	PLS3	chrX:114795501-114885181	+	protein_coding	117.48
ENSG00000102030.15_3	NAA10	chrX:153194695-153200676	-	protein_coding	70.9313
ENSG00000102032.12_3	RENBP	chrX:153200716-153210143	-	protein_coding	9.24507
ENSG00000102034.16_2	ELF4	chrX:129198849-129244691	-	protein_coding	27.989
ENSG00000102038.15_3	SMARCA1	chrX:128580478-128657477	-	protein_coding	6.19626
ENSG00000102043.15_3	MTMR8	chrX:63487961-63615311	-	protein_coding	1.00494
ENSG00000102054.17_3	RBBP7	chrX:16857406-16888537	-	protein_coding	28.9869
ENSG00000102078.15_2	SLC25A14	chrX:129473862-129507335	+	protein_coding	4.00272
ENSG00000102081.13_3	FMR1	chrX:146993469-147032645	+	protein_coding	2.64956
ENSG00000102096.9_2	PIM2	chrX:48770459-48776301	-	protein_coding	10.6267
ENSG00000102098.17_3	SCML2	chrX:18257434-18372847	-	protein_coding	2.45839
ENSG00000102100.15_3	SLC35A2	chrX:48760457-48769235	-	protein_coding	4.07953
ENSG00000102103.15_3	PQBP1	chrX:48755195-48760420	+	protein_coding	102.668
ENSG00000102109.8_2	PCSK1N	chrX:48689504-48694035	-	protein_coding	38.8143
ENSG00000102119.10_2	EMD	chrX:153607557-153609883	+	protein_coding	68.9808
ENSG00000102125.15_3	TAZ	chrX:153639854-153650065	+	protein_coding	3.62642
ENSG00000102144.13_2	PGK1	chrX:77320685-77384793	+	protein_coding	147.815
ENSG00000102158.19_2	MAGT1	chrX:77081861-77151090	-	protein_coding	9.92009
ENSG00000102172.15_3	SMS	chrX:21958691-22012953	+	protein_coding	82.5899
[truncated: 10,302 more rows]
